# Supplementary material for: Identification of a novel nucleotide metabolism-related signature for predicting lung adenocarcinoma prognosis
Source: Research Square preprint supplement (doi:10.21203/rs.3.rs-7509527/v1), 2025-10-06
Supplement: Supplementary file 1 [file 2fb7f1b3a34cdc8c008ad563.xlsx]

## Sheet: C1 vs C2
	logFC	AveExpr	T	P.Value	B
FGA	0.718538	2.77018	2.39777	0.0168555	-4.92012
IGHV7-4-1	-0.609144	2.55818	-2.4074	0.0164223	-4.89722
CRABP2	-0.592977	6.2223	-2.54963	0.0110765	-4.54884
MUC5B	0.666961	3.12662	2.57204	0.0103935	-4.49218
SCGB1A1	0.781305	3.21469	2.66829	0.0078676	-4.24329
IGHG1	-0.605511	10.0645	-2.71331	0.00688793	-4.12385
IGHD	0.677669	4.0104	2.72032	0.00674551	-4.10505
MUC21	0.635664	3.14995	2.77368	0.00574669	-3.9606
RNU4-1	-0.63931	0.882254	-2.82931	0.00484952	-3.80709
PSPHP1	-0.77198	2.22359	-2.86172	0.00438737	-3.71628
RNU5B-1	-0.611071	0.514335	-2.9237	0.00361345	-3.53986
SCARNA5	-0.632576	0.791285	-2.9481	0.00334461	-3.46942
RNY1	-0.64884	0.655411	-2.97153	0.00310378	-3.40124
AKR1B10	-0.827785	2.18806	-2.98721	0.00295155	-3.35531
BARX1	0.59402	1.49914	3.03293	0.00254588	-3.22008
MIR3609	-0.590213	0.655645	-3.03911	0.00249512	-3.20163
RNU5A-1	-0.618059	0.593251	-3.05092	0.00240073	-3.1663
RNU4-2	-0.833738	1.27004	-3.13967	0.00178988	-2.89664
MMP7	-0.639604	4.46051	-3.16688	0.00163352	-2.81246
KRT17	-0.702369	3.58429	-3.1746	0.00159151	-2.78845
UCHL1	-0.690971	3.41602	-3.1947	0.00148678	-2.72568
LTF	0.68172	3.59656	3.21481	0.00138842	-2.66251
MMP13	-0.628823	2.20372	-3.23325	0.00130353	-2.60424
IGHA2	0.65707	6.77259	3.24965	0.0012321	-2.55215
SAA1	-0.66648	3.24031	-3.27072	0.00114564	-2.48485
BPIFA1	1.16979	4.07442	3.27776	0.001118	-2.46225
FGG	1.05996	4.00324	3.40072	0.000725053	-2.0604
TCN1	-0.785048	1.9793	-3.40959	0.00070241	-2.03089
PSCA	-0.690577	1.51568	-3.41282	0.000694311	-2.02009
ASCL1	0.743627	1.01421	3.41532	0.00068812	-2.01176
FGFBP1	-0.59019	2.15627	-3.43626	0.000638184	-1.94163
IGFBP2	0.625053	4.33376	3.44214	0.000624782	-1.92186
KRT6A	-0.844852	2.01079	-3.49738	0.000511096	-1.73459
FGL1	0.740402	1.6734	3.50067	0.000504976	-1.72335
SNCG	-0.645411	3.37181	-3.54435	0.000429959	-1.57313
RHOV	-0.604377	3.2742	-3.60035	0.000348997	-1.37793
TFF3	0.997271	4.44722	3.66891	0.000269335	-1.13502
CALCA	1.00085	1.27851	3.6786	0.000259568	-1.10036
RN7SL3	-0.744056	1.9145	-3.75877	0.000190597	-0.810073
KLK12	0.737582	1.04593	3.77261	0.000180594	-0.759337
S100A2	-0.689892	3.47199	-3.7768	0.000177669	-0.743961
MUCL3	0.587973	1.10101	3.86348	0.000126261	-0.422009
MUC4	0.591263	2.27976	3.8814	0.000117558	-0.354599
CSAG1	-0.656074	0.827751	-3.96725	8.32e-05	-0.0275706
MAGEA12	-0.606292	0.721707	-3.99166	7.53e-05	0.0666723
TESC	0.895746	3.94968	3.99289	7.49e-05	0.0714396
BPIFA2	0.599067	1.0975	4.03649	6.26e-05	0.241118
SNORD17	-0.779305	1.58103	-4.04384	6.08e-05	0.269886
AOC1	0.778806	2.25723	4.05207	5.87e-05	0.302163
SERPINA1	0.742839	6.72472	4.05477	5.81e-05	0.312751
EYA2	-0.60114	1.76446	-4.07195	5.41e-05	0.38039
CST6	-0.749293	3.63705	-4.09496	4.91e-05	0.471391
MUC3A	0.60958	1.48401	4.10616	4.69e-05	0.515851
CD1A	0.632165	1.81927	4.11176	4.58e-05	0.538127
KRT81	-0.733759	1.22727	-4.11474	4.52e-05	0.549976
SPDEF	0.67029	3.82901	4.13483	4.16e-05	0.630163
CACNG4	-0.608104	1.70836	-4.19012	3.29e-05	0.852749
NCCRP1	-0.610308	1.3468	-4.19682	3.2e-05	0.879934
PRAME	-0.779968	1.65462	-4.20578	3.08e-05	0.916297
MSMB	1.13707	2.53058	4.21669	2.94e-05	0.960705
SPINK1	1.28491	4.29895	4.24603	2.59e-05	1.08067
GSTA1	0.89547	2.65686	4.27123	2.32e-05	1.18431
KCNN4	-0.633929	3.6512	-4.31556	1.91e-05	1.368
IL20RB	-0.607692	1.39737	-4.32066	1.87e-05	1.38924
BPIFB2	0.827076	1.22158	4.32465	1.84e-05	1.40585
ITGA2	-0.589657	3.63243	-4.32839	1.81e-05	1.42149
IDO1	-0.64737	2.97958	-4.33818	1.73e-05	1.46238
MT-ND6	0.695559	10.2096	4.34245	1.7e-05	1.48026
EREG	-0.774868	1.46797	-4.34413	1.69e-05	1.48728
ERN2	0.73183	1.55089	4.36728	1.53e-05	1.58453
BMP3	0.620288	1.99429	4.38797	1.39e-05	1.6718
SHISA2	0.632514	1.73396	4.39094	1.37e-05	1.68439
SERPIND1	0.729161	1.57754	4.394	1.36e-05	1.69735
LINC02866	0.635773	0.843587	4.4213	1.2e-05	1.81323
MAGEA6	-0.791616	0.952465	-4.44491	1.08e-05	1.91402
MAGEA3	-0.862806	1.08958	-4.48941	8.85e-06	2.10531
HOXB7	-0.613195	2.60667	-4.49402	8.66e-06	2.12525
MMP9	-0.694376	4.2287	-4.55676	6.51e-06	2.39821
CDKN2A	-0.682852	1.92366	-4.56492	6.28e-06	2.43396
B3GNT3	-0.613616	3.85506	-4.60396	5.25e-06	2.60586
HBA2	0.686919	2.53729	4.60587	5.2e-06	2.6143
PTPN13	0.600339	2.73076	4.60746	5.16e-06	2.62134
ELN	0.635542	3.52571	4.61059	5.09e-06	2.63519
GPRC5A	0.587416	5.91899	4.62363	4.79e-06	2.69298
FOSB	0.856119	2.86942	4.62615	4.73e-06	2.70416
SFRP2	-0.842099	5.41075	-4.65352	4.17e-06	2.82602
SLC7A5	-0.610215	4.37659	-4.69167	3.49e-06	2.99695
TNS4	-0.801803	2.04751	-4.697	3.4e-06	3.02094
KLK13	0.642774	0.913318	4.6976	3.39e-06	3.02362
MS4A15	0.850087	1.73938	4.70732	3.24e-06	3.06743
AMIGO2	-0.586542	3.96338	-4.73032	2.91e-06	3.17141
IL33	0.590114	2.80693	4.73961	2.78e-06	3.21356
DSP	-0.692462	4.90059	-4.75461	2.59e-06	3.28176
ARL14	-0.614044	0.805711	-4.75619	2.57e-06	3.28896
PCP4L1	0.912864	2.98486	4.76032	2.52e-06	3.30775
AC091849.2	0.737555	2.08485	4.80905	2e-06	3.5309
CDA	-0.910376	3.32054	-4.80996	1.99e-06	3.5351
MMP28	0.794044	2.51189	4.85033	1.64e-06	3.72156
PRODH	0.641799	1.80357	4.85071	1.64e-06	3.72328
H1-4	-0.688448	0.909186	-4.86093	1.56e-06	3.77076
COL1A2	-0.643335	7.14937	-4.90582	1.26e-06	3.98015
MET	-0.810051	4.71646	-4.91513	1.2e-06	4.0238
CXCL2	0.706832	4.19775	4.91754	1.19e-06	4.03513
OR2I1P	-0.60593	1.93706	-4.92539	1.14e-06	4.07197
FCN3	0.609228	1.94303	4.92757	1.13e-06	4.08223
PRRX2	-0.601867	2.0146	-4.94406	1.04e-06	4.15992
CBR1	0.586189	4.78636	4.94795	1.02e-06	4.17828
GALNT14	-0.637804	2.15402	-4.96072	9.6e-07	4.23862
COL1A1	-0.787618	7.84163	-4.9668	9.31e-07	4.26744
CD207	0.834757	1.85567	4.98453	8.54e-07	4.35154
AGR3	1.06169	4.7611	4.9867	8.45e-07	4.36185
MFAP4	0.740368	4.80843	4.99123	8.26e-07	4.38343
DKK1	-0.874319	1.67473	-4.99211	8.22e-07	4.3876
FXYD4	0.667927	0.910372	4.99408	8.14e-07	4.39698
KLK11	0.988497	2.16738	5.00777	7.61e-07	4.46226
A2M	0.589099	7.04543	5.01939	7.19e-07	4.51776
GGT6	0.68884	1.7694	5.02998	6.82e-07	4.56846
STEAP4	0.700859	3.36746	5.04774	6.24e-07	4.65369
C3	0.765147	6.52231	5.04946	6.19e-07	4.66197
LPCAT1	0.65774	6.54504	5.05324	6.07e-07	4.68016
AIM2	-0.70425	2.19819	-5.05518	6.01e-07	4.68951
EGR1	0.668476	5.73745	5.06032	5.86e-07	4.71424
LINC00973	-0.639571	0.701796	-5.07279	5.51e-07	4.77438
HAS3	0.731242	2.62242	5.07375	5.48e-07	4.77905
MMP1	-1.06369	3.93784	-5.07869	5.35e-07	4.80289
BMP2	0.588078	2.64117	5.10073	4.79e-07	4.90967
SLC7A2	0.898561	2.8304	5.11327	4.49e-07	4.97058
SPP1	-1.01006	6.9698	-5.11338	4.49e-07	4.9711
ACSL5	0.615161	4.82656	5.13623	4e-07	5.08247
ADAMDEC1	-0.682393	2.16575	-5.14431	3.84e-07	5.12193
SLPI	1.0373	7.92562	5.14542	3.82e-07	5.12736
CXCL8	-0.819794	4.02144	-5.15409	3.66e-07	5.1698
GZMB	-0.6579	2.78733	-5.16559	3.45e-07	5.22621
H2BC8	-0.682379	1.4791	-5.1831	3.16e-07	5.3123
MSLN	1.50675	5.13777	5.18427	3.14e-07	5.31803
ACKR1	0.669983	2.34345	5.18642	3.1e-07	5.32864
TMEM45A	-0.603159	2.33201	-5.18825	3.07e-07	5.33766
H3C10	-0.597556	1.92965	-5.1962	2.95e-07	5.37685
VTCN1	-0.745786	1.49255	-5.19644	2.95e-07	5.37804
H2AC8	-0.760114	1.63652	-5.24496	2.3e-07	5.61846
KLK6	-0.698069	0.748653	-5.24685	2.28e-07	5.6279
MMP12	-0.988909	3.46868	-5.27152	2e-07	5.75094
FCER1A	0.760658	1.94648	5.29319	1.79e-07	5.85946
CLDN2	1.13004	2.0462	5.31156	1.63e-07	5.95177
CXCL9	-0.969848	4.44113	-5.32386	1.53e-07	6.01375
ITGA11	-0.602919	2.09016	-5.36269	1.25e-07	6.21018
CLIC6	0.986298	4.45061	5.38628	1.1e-07	6.33017
ADRA2A	0.706156	1.78259	5.39492	1.05e-07	6.37423
H2AC13	-0.637927	1.18328	-5.4171	9.37e-08	6.4876
FKBP10	-0.680634	4.75096	-5.48313	6.6e-08	6.82763
CLU	0.84838	5.1692	5.48655	6.48e-08	6.84534
RETN	0.705329	1.57358	5.49911	6.06e-08	6.91051
GPC4	0.638052	4.42384	5.53253	5.06e-08	7.08445
AL359704.2	0.860579	0.788487	5.54258	4.8e-08	7.13693
CREB3L1	0.835836	4.11	5.5555	4.47e-08	7.20454
CILP	-0.721294	1.80171	-5.56384	4.28e-08	7.24824
DACT2	0.688701	1.13467	5.57077	4.12e-08	7.28458
CTSE	1.35952	4.79877	5.58058	3.91e-08	7.33617
GEM	0.647882	3.92148	5.59699	3.57e-08	7.42256
SDHAP3	0.720212	3.28931	5.59815	3.55e-08	7.42866
DUSP1	0.696176	6.88221	5.60313	3.46e-08	7.45496
MIR3189	0.860565	1.83984	5.61977	3.16e-08	7.54289
C5	0.776591	2.19063	5.64955	2.68e-08	7.70083
PRR15L	0.736874	5.03498	5.65453	2.61e-08	7.72733
LRRC15	-0.753079	2.08698	-5.65889	2.55e-08	7.75052
TMPRSS11E	-0.990717	1.8245	-5.66625	2.45e-08	7.78974
TPPP3	0.86732	3.39824	5.68502	2.21e-08	7.8899
AC073648.6	0.601354	0.820393	5.69702	2.07e-08	7.95411
HNF1B	0.590705	2.38863	5.7206	1.82e-08	8.08063
TNNT1	-1.06302	2.525	-5.72845	1.74e-08	8.12287
GDF15	0.933332	4.68204	5.73016	1.72e-08	8.13204
CLDN18	1.2822	2.50396	5.73211	1.7e-08	8.14256
SOD3	0.673599	3.99988	5.73241	1.7e-08	8.14415
GFRA3	1.10828	2.15894	5.74279	1.61e-08	8.20009
AC022733.1	0.788654	1.07244	5.80384	1.14e-08	8.53086
DCBLD2	-0.706402	3.33781	-5.81415	1.08e-08	8.58706
GBP5	-0.624867	2.14769	-5.82192	1.03e-08	8.62943
ZFP36	0.678203	6.58567	5.82537	1.01e-08	8.64828
FBLN5	0.590216	3.15814	5.83287	9.71e-09	8.68927
EGFL7	0.603234	3.97091	5.83355	9.67e-09	8.69294
ARSL	0.917631	2.68512	5.84651	8.99e-09	8.76389
VWA2	0.612952	2.74157	5.86582	8.07e-09	8.86984
SCUBE2	0.618372	1.36061	5.88323	7.31e-09	8.96562
SERPINE1	-0.83072	4.70256	-5.90617	6.42e-09	9.09217
CAPN9	0.722793	1.44779	5.90686	6.39e-09	9.09601
THBS2	-0.817815	3.42555	-5.91912	5.96e-09	9.16385
COL3A1	-0.837112	7.95152	-5.92543	5.75e-09	9.19878
ORM2	0.865249	1.74867	5.93005	5.6e-09	9.22439
ODC1	0.798027	5.70883	5.94596	5.12e-09	9.31276
KRT16	-0.941057	1.55458	-5.96357	4.63e-09	9.41078
PRR15	-0.89002	1.99124	-5.96499	4.59e-09	9.41873
COL7A1	-0.655367	1.41704	-5.96827	4.51e-09	9.43699
CHRDL1	0.763887	2.13763	5.9759	4.31e-09	9.47956
TMEM156	-0.602039	1.67935	-5.98715	4.04e-09	9.54247
FMO5	0.800963	2.99748	5.9967	3.83e-09	9.59588
CDH3	-0.903695	3.87658	-5.99817	3.79e-09	9.60413
NDNF	0.917984	3.78747	6.00243	3.7e-09	9.62803
RASD1	1.05394	4.68394	6.00259	3.7e-09	9.62888
C7	0.959861	3.1369	6.02041	3.34e-09	9.72891
NR0B2	0.916563	1.4282	6.04145	2.96e-09	9.84733
CERS4	0.659793	3.31033	6.04178	2.95e-09	9.8492
ROS1	0.892113	2.90869	6.04343	2.92e-09	9.85849
SDR16C5	0.814494	3.85148	6.0531	2.76e-09	9.91307
EIF4EBP1	-0.676166	5.37398	-6.05412	2.75e-09	9.91884
LY6K	-0.586808	0.845097	-6.05903	2.67e-09	9.94656
LOX	-0.618421	2.83176	-6.05938	2.67e-09	9.94855
AGPAT2	0.635728	5.92064	6.06124	2.64e-09	9.95908
GJB1	0.895016	1.72335	6.06718	2.55e-09	9.99265
HABP2	0.954934	1.98797	6.07138	2.49e-09	10.0164
AC078925.4	0.788394	1.89332	6.08629	2.28e-09	10.1009
AC025154.2	0.687089	0.997749	6.09138	2.21e-09	10.1298
CD55	0.701268	5.86651	6.11547	1.92e-09	10.2668
PIGR	1.64665	5.97165	6.11564	1.92e-09	10.2678
MMP11	-1.11107	3.80446	-6.1226	1.84e-09	10.3074
HPN	0.828972	3.55245	6.12566	1.81e-09	10.3249
KIF12	0.774835	1.92327	6.12872	1.78e-09	10.3424
CFTR	0.639628	1.26276	6.1316	1.75e-09	10.3588
INHBA	-0.664232	2.65216	-6.14784	1.59e-09	10.4516
PTTG1	-0.612234	3.59592	-6.14817	1.59e-09	10.4535
PFKP	-0.650659	4.04755	-6.15156	1.56e-09	10.4729
CLMP	-0.59639	2.09322	-6.15231	1.55e-09	10.4772
RHOB	0.60582	6.93753	6.17437	1.36e-09	10.6037
ALDH3B1	0.706478	3.89688	6.17611	1.35e-09	10.6137
CDKL2	0.676308	1.83647	6.19153	1.23e-09	10.7024
CAPN8	0.971196	3.70812	6.19897	1.18e-09	10.7452
AQP1	1.10209	5.77508	6.20255	1.15e-09	10.7659
TSPAN7	0.774612	2.20958	6.20887	1.11e-09	10.8023
SCNN1A	0.736799	5.50976	6.21041	1.1e-09	10.8112
FLRT3	0.762161	2.8557	6.23739	9.38e-10	10.9673
PFN2	-0.814686	4.2681	-6.23912	9.29e-10	10.9773
FN1	-0.782421	7.25239	-6.25273	8.56e-10	11.0563
CLIC3	0.871474	3.60141	6.26542	7.94e-10	11.13
ATP13A4	0.9393	2.44299	6.26588	7.92e-10	11.1327
AQP5	1.58527	3.18276	6.26925	7.76e-10	11.1522
EPHB2	-0.591189	1.887	-6.27158	7.65e-10	11.1658
SLC47A1	0.586559	1.44276	6.27301	7.59e-10	11.1742
FOS	0.84229	6.15493	6.27447	7.52e-10	11.1827
CEBPD	0.633838	6.15467	6.27699	7.41e-10	11.1973
RASSF7	0.602704	4.57668	6.29012	6.85e-10	11.2739
RFLNA	-0.610839	1.21125	-6.2909	6.82e-10	11.2784
SERPINB5	-1.01388	1.32945	-6.29088	6.82e-10	11.2783
MACROD2	0.671816	1.16279	6.30187	6.39e-10	11.3425
GJB3	-0.968684	1.85996	-6.31323	5.97e-10	11.409
SRPX2	-0.674857	2.34813	-6.3144	5.93e-10	11.4158
SLC6A8	-0.697893	2.78451	-6.32426	5.59e-10	11.4736
LINC00676	1.16569	0.752437	6.32956	5.41e-10	11.5047
MST1L	0.632028	1.0788	6.33514	5.23e-10	11.5374
SLC44A4	0.933036	4.94661	6.34813	4.84e-10	11.6138
TACC2	0.628434	2.62093	6.34854	4.83e-10	11.6162
RORC	0.626625	3.0482	6.35513	4.64e-10	11.655
OTULINL	0.613377	2.45292	6.36775	4.3e-10	11.7293
FSCN1	-0.836511	4.59836	-6.38349	3.91e-10	11.8223
LOXL2	-0.716582	2.96323	-6.38912	3.78e-10	11.8556
H2BC11	-0.707205	1.48505	-6.40985	3.33e-10	11.9783
VCAN	-0.806502	3.76421	-6.41107	3.31e-10	11.9855
CCT8P1	0.653747	2.03311	6.4161	3.21e-10	12.0154
RHPN2	-0.604678	2.99302	-6.41894	3.15e-10	12.0322
RCAN2	0.65582	2.49535	6.43084	2.93e-10	12.1029
TDRD10	0.643015	1.25034	6.43984	2.78e-10	12.1565
CDCP1	-0.66288	3.56518	-6.46072	2.45e-10	12.281
FAM83E	0.75178	3.64993	6.4813	2.16e-10	12.404
EGLN3	-0.886863	2.82467	-6.49256	2.01e-10	12.4715
FOSL1	-0.913126	2.28348	-6.52359	1.66e-10	12.6579
KRT80	-0.738937	3.68023	-6.52702	1.63e-10	12.6785
SYBU	0.650815	1.79227	6.53436	1.56e-10	12.7228
TST	0.659377	4.63004	6.5444	1.46e-10	12.7833
HP	1.2324	2.22189	6.55123	1.4e-10	12.8246
ERO1B	0.663939	2.18718	6.55364	1.38e-10	12.8391
IGFBP3	-0.872979	5.85356	-6.55543	1.37e-10	12.85
CRLF1	1.55776	3.09291	6.55687	1.35e-10	12.8587
SLC39A8	0.635281	4.08911	6.56282	1.31e-10	12.8946
AHNAK2	-0.829177	2.33903	-6.56601	1.28e-10	12.914
STMN1	-0.643386	4.4335	-6.57699	1.2e-10	12.9805
SLC34A2	1.26643	7.8724	6.57874	1.18e-10	12.9911
TFRC	-0.61973	4.28545	-6.58288	1.15e-10	13.0162
KCNK3	0.663914	1.2469	6.59495	1.07e-10	13.0894
CNGA3	0.707556	0.712899	6.60298	1.02e-10	13.1383
CXCL11	-0.85109	2.05362	-6.61248	9.6e-11	13.1961
TMEM37	0.709677	3.00142	6.632	8.5e-11	13.3151
FBP1	0.679036	4.71483	6.63383	8.4e-11	13.3262
ANKRD65	0.872654	3.29901	6.64109	8.03e-11	13.3706
TENT5A	0.593205	3.24213	6.64685	7.74e-11	13.4058
NGEF	-0.633436	1.52734	-6.65369	7.42e-11	13.4476
ELAPOR1	1.11718	2.76247	6.66016	7.13e-11	13.4873
PDE4D	0.646282	1.97177	6.67235	6.6e-11	13.562
GCLC	-0.935777	2.94525	-6.68627	6.05e-11	13.6475
POSTN	-0.865579	5.35749	-6.68978	5.92e-11	13.669
NINJ2	0.630622	2.80373	6.70902	5.24e-11	13.7874
CCL11	-0.673614	1.49399	-6.73065	4.58e-11	13.921
TNFAIP6	-0.625872	2.0835	-6.75172	4.01e-11	14.0513
HAGLR	0.928563	2.79107	6.75947	3.81e-11	14.0994
TNS1	0.62165	3.87442	6.76697	3.64e-11	14.1459
TGFBI	-0.861899	4.97636	-6.79465	3.05e-11	14.318
PKIB	-0.783877	2.07378	-6.79579	3.03e-11	14.3251
PLA2G12B	0.7851	1.11668	6.8069	2.82e-11	14.3944
SPOCK1	-0.78508	1.36877	-6.8082	2.8e-11	14.4025
CPAMD8	0.723863	1.57033	6.82916	2.45e-11	14.5334
C2	0.684417	2.60305	6.83519	2.36e-11	14.5711
COL5A2	-0.833403	4.63141	-6.83516	2.36e-11	14.571
PLXNA2	0.608925	2.45964	6.83833	2.31e-11	14.5908
APOBEC3B	-0.698024	1.71204	-6.84943	2.15e-11	14.6604
TMEM59L	1.15402	1.77383	6.85041	2.14e-11	14.6665
LINC00261	0.810752	1.42063	6.85587	2.06e-11	14.7008
CXCL10	-1.07399	4.46351	-6.86301	1.97e-11	14.7456
SCTR	1.03068	2.08215	6.87793	1.79e-11	14.8394
FOXA2	1.0239	2.89927	6.88718	1.69e-11	14.8977
MIR3677	0.609763	1.1483	6.89131	1.64e-11	14.9237
SCGB3A1	2.13828	5.39659	6.89548	1.6e-11	14.9499
GADD45G	0.816331	3.48787	6.89942	1.56e-11	14.9748
DSCAM-AS1	1.12542	0.766632	6.90988	1.46e-11	15.0409
TSPAN11	0.802166	1.59394	6.92157	1.35e-11	15.1147
KIT	1.03363	3.04553	6.94424	1.17e-11	15.2583
SEMA3A	-0.750118	1.5589	-6.94617	1.15e-11	15.2706
MMP14	-0.691206	6.10418	-6.95252	1.11e-11	15.3108
CITED2	0.668357	5.34116	6.95856	1.07e-11	15.3492
GLTPD2	0.617054	0.939329	6.95992	1.06e-11	15.3579
ITGB8	-0.79022	1.65134	-6.96615	1.01e-11	15.3974
HMGA2	-0.725861	0.677932	-6.96881	9.97e-12	15.4144
PALLD	-0.588573	3.90948	-6.97484	9.59e-12	15.4527
HMGA1	-0.784538	6.58618	-6.97809	9.39e-12	15.4734
PBK	-0.734933	2.22006	-6.98432	9.02e-12	15.5131
HTR1D	-0.600856	0.897224	-6.99855	8.22e-12	15.6038
MXRA5	-0.84272	3.6176	-7.00889	7.68e-12	15.6699
AK4	-0.711045	2.05455	-7.01245	7.51e-12	15.6927
ESAM	0.6581	3.83971	7.01931	7.18e-12	15.7365
CDK2AP2	0.667272	5.52833	7.02444	6.94e-12	15.7694
RND1	0.90419	2.72282	7.02828	6.77e-12	15.794
ABO	0.806809	2.40886	7.03071	6.66e-12	15.8095
ADGRF5	1.00722	4.66785	7.0349	6.49e-12	15.8364
AURKA	-0.699126	3.04204	-7.03868	6.33e-12	15.8606
NEIL3	-0.617375	1.20878	-7.04294	6.15e-12	15.888
DMBT1	1.43474	2.87093	7.04745	5.97e-12	15.9169
SMIM10L2A	0.645959	1.32765	7.06414	5.36e-12	16.0242
TMPRSS2	0.936831	3.78079	7.06706	5.25e-12	16.043
AL135999.3	1.03632	1.8758	7.07244	5.07e-12	16.0776
CRYM	1.0938	2.17554	7.07385	5.02e-12	16.0867
ZNF750	0.868607	2.04682	7.08255	4.75e-12	16.1427
DSG2	-0.717183	4.91068	-7.08471	4.68e-12	16.1566
ORM1	1.14803	2.18947	7.08823	4.57e-12	16.1793
NFIX	0.737756	3.4644	7.0893	4.54e-12	16.1862
GGH	-0.643565	1.66214	-7.09528	4.37e-12	16.2248
TFAP2A	-0.587912	1.24826	-7.09684	4.32e-12	16.2349
PLEK2	-0.719445	3.51014	-7.10051	4.22e-12	16.2586
MTURN	0.593681	2.53623	7.1022	4.17e-12	16.2695
PKP2	-0.787989	1.61705	-7.10637	4.06e-12	16.2964
COL12A1	-1.04037	3.13325	-7.115	3.83e-12	16.3523
IRX1	0.606184	0.597227	7.13273	3.41e-12	16.4671
ATAD3C	0.614091	1.81279	7.1352	3.35e-12	16.4831
C15orf48	-1.03927	3.29857	-7.13587	3.34e-12	16.4875
COL25A1	0.722091	0.521666	7.1415	3.22e-12	16.524
TMEM158	-0.657303	1.52375	-7.15337	2.98e-12	16.6011
AP003498.2	0.732171	1.95951	7.15972	2.85e-12	16.6423
TSKU	-0.758723	3.99808	-7.16515	2.75e-12	16.6777
TDRP	0.592428	2.91451	7.17918	2.51e-12	16.769
AP000357.2	0.678218	0.783362	7.18132	2.47e-12	16.783
LDHD	0.709203	2.16578	7.18823	2.36e-12	16.8281
UBE2S	-0.684971	2.8465	-7.18926	2.34e-12	16.8348
IRX6	0.738804	0.890897	7.1919	2.3e-12	16.852
MECOM	0.735235	2.82515	7.21767	1.94e-12	17.0205
DOK4	0.761624	3.50547	7.21804	1.94e-12	17.0229
LMO3	1.04704	3.15639	7.21875	1.93e-12	17.0276
CXCL17	1.37777	7.11687	7.22479	1.85e-12	17.0671
TCIM	1.065	6.77533	7.23042	1.78e-12	17.104
RPS29P11	1.03108	2.62691	7.23226	1.76e-12	17.116
CRTAC1	1.05465	2.25481	7.24085	1.66e-12	17.1724
MUC1	1.00037	7.02994	7.25385	1.52e-12	17.2578
AC079467.1	0.674191	0.853432	7.25671	1.5e-12	17.2766
PERP	-0.634072	5.92228	-7.26024	1.46e-12	17.2999
AC079384.1	0.680867	0.582351	7.28029	1.28e-12	17.4319
SULF1	-0.95409	3.99464	-7.30454	1.08e-12	17.5919
FAM3C2P	-0.645092	3.08585	-7.30792	1.06e-12	17.6143
UBE2T	-0.718454	3.51959	-7.337	8.71e-13	17.8069
SEMA3C	-0.770611	3.41339	-7.34073	8.5e-13	17.8316
LMNB1	-0.611252	3.75108	-7.3432	8.36e-13	17.848
ATP13A4-AS1	0.804863	0.881383	7.34509	8.25e-13	17.8606
MBIP	0.740708	4.46702	7.34577	8.21e-13	17.8651
KCNJ15	0.948204	2.13931	7.35111	7.92e-13	17.9006
CCN4	-0.663584	2.2738	-7.35261	7.84e-13	17.9105
ATP2C2	0.673263	2.06406	7.35592	7.67e-13	17.9325
GRAMD2A	0.711698	2.13753	7.36702	7.11e-13	18.0064
ADH1B	1.00565	1.77704	7.37184	6.89e-13	18.0385
C1orf116	1.14578	4.81747	7.3737	6.8e-13	18.0509
CPD	-0.735854	4.71267	-7.38955	6.11e-13	18.1565
STYK1	-0.596692	1.89288	-7.3907	6.06e-13	18.1642
ALDH3A2	0.661252	3.48511	7.39721	5.8e-13	18.2076
COX4I2	0.646729	2.54641	7.43497	4.48e-13	18.4603
PTCSC3	0.838539	1.34464	7.43636	4.44e-13	18.4696
GBP1	-0.825908	3.97173	-7.44623	4.15e-13	18.5359
CST3	0.64086	6.36069	7.44702	4.13e-13	18.5412
SPINK5	1.07451	1.70848	7.45968	3.79e-13	18.6262
MTUS1	0.676131	3.70584	7.46974	3.53e-13	18.6939
TK1	-0.84896	4.87708	-7.48345	3.22e-13	18.7862
BCAM	0.925707	5.58401	7.48707	3.14e-13	18.8106
CSF3R	0.893724	2.57705	7.49172	3.04e-13	18.842
PLAU	-1.11451	5.01305	-7.49461	2.98e-13	18.8615
LINC01614	-0.828346	1.71569	-7.49858	2.9e-13	18.8883
ZBTB16	0.748881	1.07673	7.51317	2.62e-13	18.9869
ADM	-0.931197	3.08961	-7.51643	2.57e-13	19.0089
GJB2	-1.14607	3.33494	-7.54566	2.1e-13	19.207
CAVIN2	0.858647	3.295	7.55824	1.92e-13	19.2924
VEGFD	0.816764	1.21796	7.56452	1.84e-13	19.3351
TWIST1	-0.673561	1.06036	-7.56672	1.81e-13	19.35
C9orf152	0.93406	2.7388	7.57873	1.67e-13	19.4317
C11orf96	0.793364	3.12162	7.58151	1.64e-13	19.4506
PPP1R1B	1.39505	2.8674	7.60061	1.43e-13	19.5809
LAMC2	-1.15598	4.88161	-7.60521	1.39e-13	19.6122
PMAIP1	-0.861945	3.15778	-7.60617	1.38e-13	19.6188
DPYSL2	0.662511	4.35061	7.61765	1.27e-13	19.6973
ST3GAL5	0.732616	2.51798	7.62329	1.23e-13	19.7358
AQP4	1.38881	2.97237	7.6243	1.22e-13	19.7428
CFAP221	0.655007	1.23337	7.62827	1.18e-13	19.7699
B3GNT5	-0.608012	2.22803	-7.62855	1.18e-13	19.7718
EZH2	-0.585737	2.49791	-7.64071	1.09e-13	19.8551
STING1	0.668919	4.45312	7.6631	9.28e-14	20.0087
STEAP2	-0.793247	2.33644	-7.6702	8.83e-14	20.0575
CKS1B	-0.657875	3.6583	-7.67832	8.35e-14	20.1134
TROAP	-0.724595	1.91259	-7.68241	8.11e-14	20.1415
LHFPL3-AS2	0.896528	1.1841	7.68848	7.77e-14	20.1833
ENTPD3	0.704523	2.08457	7.69443	7.46e-14	20.2242
C1orf210	0.660888	3.88048	7.69896	7.22e-14	20.2555
GPC6	-0.788744	1.75437	-7.71956	6.25e-14	20.3976
CDT1	-0.739291	2.68909	-7.73338	5.67e-14	20.4932
STAT1	-0.667355	5.30665	-7.73975	5.43e-14	20.5373
ADAM12	-0.778059	1.79905	-7.74843	5.1e-14	20.5974
SERPINF2	0.873308	2.72949	7.75127	5e-14	20.6171
AC127526.5	0.765309	2.42725	7.75238	4.96e-14	20.6248
CENPM	-0.626001	2.47537	-7.76721	4.47e-14	20.7277
LYPD3	-1.13313	2.27383	-7.77456	4.25e-14	20.7787
GMPR	0.648695	2.21478	7.78923	3.83e-14	20.8807
COL11A1	-1.30396	2.24233	-7.82244	3.03e-14	21.1122
AGER	1.51026	3.72744	7.84045	2.66e-14	21.238
IRX5	0.884489	2.39103	7.84476	2.58e-14	21.2681
CMAHP	0.735599	2.0373	7.86226	2.28e-14	21.3907
C4BPA	1.72175	5.23302	7.87217	2.12e-14	21.4602
SFTPC	2.70361	5.11783	7.87978	2.01e-14	21.5136
VIPR1	0.595437	1.36274	7.8802	2.01e-14	21.5165
PCSK2	1.02839	0.607897	7.88407	1.95e-14	21.5437
PTPRH	-0.935979	1.928	-7.8941	1.82e-14	21.6142
SHE	0.799914	1.69204	7.89584	1.79e-14	21.6265
HILPDA	-0.856788	3.26033	-7.90728	1.65e-14	21.707
AL162511.1	0.67769	0.869914	7.91666	1.55e-14	21.773
GPX8	-0.6695	3.04373	-7.92316	1.48e-14	21.8189
CDCA3	-0.605337	1.62314	-7.93126	1.39e-14	21.876
SLC7A8	0.82907	2.79336	7.94086	1.3e-14	21.9437
LAMP3	1.05757	4.26689	7.94297	1.28e-14	21.9587
PRDM16	0.690891	1.13478	7.94695	1.24e-14	21.9868
TFCP2L1	0.981164	2.70597	7.9495	1.22e-14	22.0048
GPR176	-0.599679	1.73041	-7.95045	1.21e-14	22.0116
RPL26P30	0.742011	0.832889	7.95892	1.14e-14	22.0715
FCGRT	0.605125	5.3635	7.9864	9.37e-15	22.2662
CABLES1	0.661827	2.2778	7.98798	9.27e-15	22.2774
AURKB	-0.843208	2.66402	-7.99695	8.69e-15	22.3411
PNMA2	0.820903	2.16537	8.01158	7.82e-15	22.4451
HLF	0.900209	1.66988	8.02202	7.25e-15	22.5193
CYFIP2	0.610786	2.30934	8.02375	7.16e-15	22.5316
INMT	1.01501	2.52493	8.03322	6.69e-15	22.5991
PER1	0.797325	3.68422	8.07182	5.05e-15	22.8747
FBXO32	-0.78819	3.16449	-8.07415	4.97e-15	22.8914
ACOX2	0.628253	2.12471	8.07601	4.9e-15	22.9047
DSC2	-0.689116	2.36776	-8.07742	4.85e-15	22.9148
RAP1GAP	1.07679	3.53388	8.08518	4.59e-15	22.9703
ECT2	-0.709392	3.34303	-8.08744	4.51e-15	22.9866
CDK6	-0.691542	1.80712	-8.08884	4.47e-15	22.9966
AQP7	0.602839	0.777653	8.09006	4.43e-15	23.0054
SLC14A2	0.831328	0.462771	8.09481	4.28e-15	23.0394
PHYHD1	0.904212	2.18487	8.09729	4.2e-15	23.0572
AC092071.1	0.886313	1.09966	8.10445	3.99e-15	23.1085
CTSH	1.02101	4.83034	8.10591	3.94e-15	23.119
FAM3C	-0.667918	4.24953	-8.10881	3.86e-15	23.1398
LRRK2	1.15766	2.42681	8.1208	3.54e-15	23.226
RPS6KA2	0.676685	3.82999	8.13762	3.13e-15	23.3469
MELTF	-0.848213	1.6615	-8.14604	2.94e-15	23.4076
MLPH	0.949064	4.42199	8.19927	1.99e-15	23.7921
FRMD6	-0.680157	1.92277	-8.22917	1.6e-15	24.0088
AL008729.2	0.747957	2.81133	8.23985	1.48e-15	24.0864
PRRT1B	0.706947	1.22523	8.2408	1.47e-15	24.0933
IQGAP3	-0.72927	2.42239	-8.24185	1.46e-15	24.1009
LRRK2-DT	1.02349	1.4746	8.24584	1.41e-15	24.13
KIF20A	-0.716904	2.53549	-8.24657	1.41e-15	24.1352
WFDC2	1.32144	7.44201	8.26132	1.26e-15	24.2426
NKX2-1	1.26378	4.99883	8.2727	1.16e-15	24.3255
FOXM1	-0.867153	2.60177	-8.28528	1.06e-15	24.4173
NR4A1	1.07686	3.33154	8.29254	1e-15	24.4703
CLUHP3	0.591375	1.64138	8.29768	9.64e-16	24.5079
TPBG	-0.679966	3.6036	-8.32002	8.17e-16	24.6712
KIFC1	-0.851539	3.06493	-8.33122	7.52e-16	24.7533
PGM2L1	-0.641058	2.57973	-8.34698	6.69e-16	24.8689
IRX2	1.36217	2.60543	8.3524	6.42e-16	24.9087
LINC02478	0.74212	1.58937	8.35547	6.28e-16	24.9312
SCNN1G	0.924751	1.84513	8.36167	5.99e-16	24.9768
NRGN	1.259	3.71245	8.37417	5.46e-16	25.0687
KLHL5	-0.631601	3.16005	-8.39854	4.55e-16	25.2482
CCNB1	-0.874996	4.00074	-8.41798	3.94e-16	25.3917
CAT	0.602238	4.71969	8.45737	2.93e-16	25.6832
RNASE1	1.19445	8.36964	8.45721	2.93e-16	25.682
UHRF1	-0.662678	1.97977	-8.45899	2.89e-16	25.6951
CYB5A	0.826309	3.97132	8.45859	2.9e-16	25.6921
MKI67	-0.8314	2.68314	-8.46675	2.73e-16	25.7527
C5orf38	1.07564	1.88524	8.49709	2.17e-16	25.9781
ALOX15B	1.38269	3.4744	8.52212	1.8e-16	26.1645
PIMREG	-0.719524	1.6216	-8.52417	1.77e-16	26.1798
SLC16A1	-0.94366	2.23494	-8.53054	1.69e-16	26.2273
GINS1	-0.7064	2.18496	-8.53462	1.64e-16	26.2577
SFTA2	1.54787	6.08603	8.56025	1.35e-16	26.4492
STXBP1	0.76718	3.02251	8.56546	1.3e-16	26.4882
PCDH7	-0.834724	1.47617	-8.5729	1.22e-16	26.5439
GINS2	-0.709266	2.15178	-8.57798	1.18e-16	26.582
BTBD9	0.642468	2.78514	8.57988	1.16e-16	26.5962
WIF1	1.53495	2.00143	8.59975	9.98e-17	26.7453
KIF18B	-0.765781	1.81025	-8.60268	9.76e-17	26.7672
CDCA2	-0.591099	1.38415	-8.6171	8.75e-17	26.8756
AL137018.1	0.72466	0.464058	8.62036	8.53e-17	26.9001
IGF2BP3	-0.845512	1.08766	-8.62361	8.32e-17	26.9245
CGNL1	0.682351	2.2544	8.62624	8.16e-17	26.9443
ZWINT	-0.795193	3.73613	-8.6529	6.66e-17	27.1451
CENPF	-0.829313	2.37849	-8.65896	6.36e-17	27.1908
HMMR	-0.725089	2.07462	-8.67356	5.68e-17	27.301
MARCKS	-0.622423	5.33912	-8.69349	4.88e-17	27.4517
NPC2	0.947475	6.91741	8.70487	4.47e-17	27.5378
BOK	0.732408	4.09677	8.71425	4.16e-17	27.6089
FAM83D	-0.810358	2.70575	-8.72073	3.96e-17	27.6581
SFTPA2	2.69857	8.14896	8.72481	3.84e-17	27.689
MIR6071	0.73487	0.760387	8.7361	3.52e-17	27.7747
ERO1A	-0.770174	4.76351	-8.74193	3.36e-17	27.819
RND3	-0.854535	3.30562	-8.74333	3.33e-17	27.8296
SPAG5	-0.765067	2.50939	-8.74288	3.34e-17	27.8262
SLC16A11	0.590178	0.894313	8.75	3.16e-17	27.8803
UBTD1	0.709504	4.15244	8.7529	3.09e-17	27.9024
ZNF710	0.734536	3.13732	8.75641	3.01e-17	27.9291
AC023421.1	1.20596	0.646948	8.75604	3.02e-17	27.9263
DSCC1	-0.650773	1.99401	-8.76343	2.85e-17	27.9825
BAIAP2-DT	0.735093	3.56862	8.7699	2.71e-17	28.0318
MCM2	-0.783384	2.69873	-8.78771	2.36e-17	28.1675
RACGAP1	-0.694629	3.13656	-8.80128	2.13e-17	28.271
LINC02489	1.05977	1.4269	8.82573	1.76e-17	28.4579
ARHGAP44	0.59513	1.46612	8.82563	1.76e-17	28.4572
TBC1D2	0.718107	3.76387	8.82737	1.74e-17	28.4705
NUF2	-0.827627	2.13975	-8.85568	1.4e-17	28.6874
VSIG2	1.5059	3.18209	8.85636	1.39e-17	28.6926
AC009244.1	0.74403	0.84913	8.8593	1.36e-17	28.7152
SPHK1	-0.763741	2.09581	-8.86669	1.28e-17	28.7719
SEC14L6	0.775176	1.25628	8.91454	8.83e-18	29.14
ALDH2	0.746475	4.1597	8.91929	8.51e-18	29.1766
KIF14	-0.600813	1.24486	-8.91894	8.53e-18	29.1739
GPD1L	0.739654	3.81282	8.93235	7.68e-18	29.2774
SFTPA1	2.78484	7.86282	8.94126	7.17e-18	29.3461
ARHGAP11A	-0.611391	1.58899	-8.95371	6.5e-18	29.4424
RPL39L	-1.0521	3.68619	-8.97065	5.69e-18	29.5735
RBPMS	0.734015	3.11806	8.97931	5.32e-18	29.6405
EPHX1	1.06794	6.62766	9.01281	4.09e-18	29.9004
AATK	0.585245	1.07348	9.03173	3.52e-18	30.0476
UBE2C	-1.2823	4.51355	-9.04101	3.28e-18	30.1198
IGF2BP2	-0.991507	2.3962	-9.05558	2.92e-18	30.2333
AQP3	1.57436	6.57351	9.06048	2.81e-18	30.2715
HOPX	1.43574	4.60649	9.07991	2.41e-18	30.4231
SPATS2L	-0.606985	3.34337	-9.08392	2.33e-18	30.4545
CCNE1	-0.857914	2.03037	-9.08369	2.34e-18	30.4527
ARNTL2	-0.986918	2.26008	-9.0881	2.26e-18	30.4872
ZNF385B	1.03381	1.3238	9.09832	2.08e-18	30.5671
ANKRD29	0.86175	1.55648	9.1039	1.99e-18	30.6107
PARM1	1.1356	4.77309	9.11602	1.81e-18	30.7056
CIRBP	0.585198	4.97272	9.12175	1.73e-18	30.7505
PLOD2	-1.11341	3.77718	-9.12301	1.71e-18	30.7604
DUOXA1	0.877888	1.64641	9.12862	1.64e-18	30.8043
SPC25	-0.673967	1.82762	-9.12953	1.63e-18	30.8115
ATP8A1	0.852575	2.34619	9.1577	1.3e-18	31.0326
DRAM1	0.961735	4.74713	9.15915	1.29e-18	31.044
CHIA	0.99167	0.924284	9.16329	1.24e-18	31.0766
MID1IP1	0.630625	3.92644	9.17073	1.17e-18	31.1351
SORCS2	0.959696	1.7497	9.18822	1.02e-18	31.2728
LPL	1.2609	2.96086	9.19472	9.69e-19	31.324
RBPMS-AS1	0.630422	1.2146	9.19591	9.6e-19	31.3334
SIAE	0.70075	2.69145	9.237	6.91e-19	31.6578
CLEC3B	0.931005	1.98191	9.26472	5.54e-19	31.8772
DEPDC1B	-0.69876	1.52951	-9.28572	4.68e-19	32.0438
SPC24	-0.701833	1.96288	-9.29006	4.52e-19	32.0782
TCF7L1	0.897761	2.54639	9.30999	3.85e-19	32.2366
CTHRC1	-1.18881	5.10836	-9.32006	3.55e-19	32.3167
PPP1R13B	0.621693	2.7059	9.33689	3.1e-19	32.4507
MCM4	-0.796142	3.74422	-9.33963	3.03e-19	32.4725
ASF1B	-0.803326	3.35414	-9.34613	2.88e-19	32.5244
CENPK	-0.587732	1.42164	-9.35156	2.75e-19	32.5677
E2F8	-0.608884	1.51598	-9.35801	2.61e-19	32.6191
GREM1	-1.1446	2.01734	-9.3674	2.42e-19	32.6941
CDC45	-0.807739	2.08673	-9.39958	1.87e-19	32.9514
GGTLC1	1.69808	2.5049	9.42151	1.56e-19	33.1271
HSD17B6	1.25825	2.68626	9.43053	1.45e-19	33.1994
MCM10	-0.687399	1.3921	-9.4383	1.37e-19	33.2618
STEAP1	-1.2082	3.6915	-9.43767	1.37e-19	33.2568
CENPW	-0.880704	3.0879	-9.44649	1.28e-19	33.3276
CD109	-0.988982	2.08811	-9.46799	1.07e-19	33.5004
FOLR1	1.80343	5.37808	9.49289	8.76e-20	33.701
RPH3AL	0.669125	2.26391	9.50824	7.73e-20	33.8248
ALPL	1.66025	4.20636	9.51307	7.43e-20	33.8638
C8orf34-AS1	0.814126	1.05801	9.522	6.91e-20	33.9359
NCAPG2	-0.680928	2.43162	-9.52286	6.86e-20	33.9429
KIF15	-0.595301	1.36952	-9.53595	6.16e-20	34.0487
ADGRF4	-0.949232	1.23748	-9.54986	5.5e-20	34.1612
DUOX1	1.05238	1.99069	9.55353	5.34e-20	34.1909
CDCA4	-0.674925	2.86716	-9.57143	4.61e-20	34.336
ASPM	-0.758312	1.56858	-9.57694	4.41e-20	34.3806
SKA1	-0.722796	1.53176	-9.58337	4.18e-20	34.4328
ATP11A	1.01531	4.37472	9.58292	4.19e-20	34.4291
PGM2	-0.595765	3.09742	-9.61674	3.18e-20	34.7039
CTSV	-0.887055	1.31763	-9.61649	3.18e-20	34.7019
MTFR2	-0.597568	1.36442	-9.6347	2.74e-20	34.8501
MYBL2	-1.32727	3.89793	-9.64296	2.56e-20	34.9173
PLK1	-0.81314	2.33765	-9.64259	2.57e-20	34.9144
PLK4	-0.607411	1.61214	-9.64808	2.46e-20	34.9591
DTL	-0.678013	2.12058	-9.65516	2.32e-20	35.0169
KNDC1	0.807433	1.08708	9.65503	2.32e-20	35.0157
LGI3	0.802682	0.618261	9.66241	2.18e-20	35.076
CENPE	-0.602652	1.20009	-9.69401	1.68e-20	35.3342
ESYT3	0.7716	1.40643	9.71277	1.44e-20	35.4877
ORC1	-0.711406	1.70752	-9.72222	1.33e-20	35.5651
SKA3	-0.711695	1.71183	-9.73857	1.16e-20	35.6992
CDCA5	-0.927298	2.64886	-9.75979	9.75e-21	35.8735
WDHD1	-0.62503	1.85483	-9.76086	9.66e-21	35.8822
MALL	1.04826	3.09109	9.77128	8.86e-21	35.9679
GTSE1	-0.742553	1.83231	-9.77685	8.46e-21	36.0137
RAD51AP1	-0.786602	2.22409	-9.78067	8.19e-21	36.0451
CDC20	-1.1738	3.92264	-9.87425	3.75e-21	36.8177
BTG2	1.05716	5.53075	9.88709	3.37e-21	36.9242
BIRC5	-1.12014	3.30426	-9.89441	3.17e-21	36.9848
SCGB3A2	2.76282	5.52973	9.90379	2.93e-21	37.0626
PLA2G1B	1.46673	1.75553	9.92929	2.37e-21	37.2744
LTA4H	0.628098	4.77769	9.94065	2.15e-21	37.3689
PXMP4	0.856808	2.79185	9.94706	2.04e-21	37.4223
FAM111B	-0.779167	2.01101	-9.9467	2.05e-21	37.4193
AC129507.2	0.63536	0.822713	9.9516	1.96e-21	37.4601
DEPDC1	-0.728071	1.35756	-9.97135	1.66e-21	37.6246
RAD51	-0.635943	1.69181	-9.97587	1.6e-21	37.6623
MAD2L1	-0.806488	2.12272	-9.98415	1.49e-21	37.7314
MTARC2	0.744049	2.76496	9.98803	1.44e-21	37.7637
CENPI	-0.585323	1.19941	-10.019	1.11e-21	38.0226
KPNA2	-0.853573	3.92239	-10.06	7.86e-22	38.3663
RFC4	-0.740538	2.84437	-10.0822	6.51e-22	38.5526
SNX30	0.862782	2.70713	10.0864	6.29e-22	38.5872
EXO1	-0.780429	1.66377	-10.0994	5.63e-22	38.6966
CDKN3	-0.953365	2.43188	-10.145	3.82e-22	39.0805
SFTA1P	1.2973	2.07283	10.1597	3.37e-22	39.2045
SLC22A3	1.32493	2.92227	10.1611	3.33e-22	39.2169
NEK2	-0.973472	2.46172	-10.1631	3.27e-22	39.2335
GPRC5C	1.07612	3.41287	10.163	3.28e-22	39.2327
ACADSB	0.752413	2.76065	10.1811	2.81e-22	39.3853
NCAPG	-0.839483	1.82851	-10.1802	2.83e-22	39.3777
MMD	-0.820914	3.35739	-10.1801	2.83e-22	39.3768
CENPA	-0.919659	1.97902	-10.1904	2.59e-22	39.464
AC084375.1	0.987745	0.982896	10.1948	2.5e-22	39.5015
NCAPH	-0.74797	1.68893	-10.2072	2.25e-22	39.6065
BUB1B	-0.80125	1.83316	-10.2431	1.65e-22	39.9112
SHCBP1	-0.617093	1.54355	-10.2706	1.31e-22	40.1445
NAPSA	2.21557	6.62433	10.2807	1.2e-22	40.2299
BRCA1	-0.619453	1.53632	-10.2868	1.14e-22	40.2821
UNC13B	0.841275	2.84485	10.2961	1.05e-22	40.3618
KIF11	-0.829755	2.54073	-10.3055	9.68e-23	40.4411
BUB1	-0.855791	2.22871	-10.3074	9.52e-23	40.4574
KCNQ1	1.14244	2.79244	10.3143	8.97e-23	40.5165
HJURP	-0.969686	2.22947	-10.3259	8.11e-23	40.6155
CYP2B7P	1.91001	3.90463	10.358	6.15e-23	40.8898
TMEM163	1.09252	2.25751	10.398	4.36e-23	41.2317
SUSD2	1.86934	3.86138	10.397	4.39e-23	41.2237
CCNB2	-0.943059	2.93692	-10.4153	3.75e-23	41.3803
CDK1	-0.980091	3.16849	-10.4272	3.38e-23	41.4826
IRX3	1.22729	3.6855	10.5028	1.75e-23	42.133
NDC80	-0.876998	2.03977	-10.5093	1.66e-23	42.1889
CEP55	-1.01325	2.88404	-10.6239	6.09e-24	43.1816
CYP4B1	2.05056	3.41218	10.6297	5.79e-24	43.2322
TOP2A	-1.19032	4.13679	-10.6643	4.27e-24	43.5336
MELK	-1.02692	2.48034	-10.676	3.86e-24	43.635
SLC26A9	1.54185	2.33672	10.7028	3.05e-24	43.8688
CDCA8	-0.980179	3.07702	-10.7089	2.89e-24	43.9224
KIF23	-0.802012	1.87291	-10.7479	2.05e-24	44.263
CDC6	-0.927473	2.26388	-10.7806	1.53e-24	44.5497
RRM2	-0.997557	2.67983	-10.7911	1.4e-24	44.6416
CIT	1.19085	1.98699	10.8046	1.24e-24	44.7604
RNF145	0.810593	5.3686	10.8148	1.13e-24	44.8499
CHEK1	-0.812455	2.01154	-10.826	1.02e-24	44.949
PLA2G10	1.41737	2.04462	10.8377	9.24e-25	45.0513
TMEM125	1.08195	5.15645	10.8461	8.58e-25	45.1251
AL663070.1	0.760178	1.14059	10.8599	7.59e-25	45.2469
AHCYL2	1.27325	4.15702	10.867	7.12e-25	45.3097
TNS2	0.760398	3.21693	10.8833	6.16e-25	45.4532
PMM1	0.711642	2.62667	10.8922	5.69e-25	45.532
TPX2	-1.26749	3.802	-10.9016	5.24e-25	45.6144
DLGAP5	-1.01077	2.373	-10.8998	5.32e-25	45.5991
SCNN1B	1.48926	3.43901	10.9475	3.48e-25	46.0207
CKAP2L	-0.735884	1.44988	-10.9979	2.22e-25	46.4674
KIF4A	-1.00062	2.28572	-11.0317	1.64e-25	46.7683
PRR11	-0.860981	1.99749	-11.0437	1.47e-25	46.8752
CENPU	-0.854688	2.45094	-11.1106	8.05e-26	47.4714
CISH	0.952775	3.18564	11.1157	7.69e-26	47.5176
CCNA2	-1.03556	2.78417	-11.1461	5.85e-26	47.7892
TTK	-0.869686	1.66169	-11.1742	4.54e-26	48.0408
MAOA	1.30246	4.18139	11.2489	2.31e-26	48.7118
ABCA3	1.68578	4.36667	11.2944	1.53e-26	49.1218
TRIP13	-1.12318	2.75417	-11.3113	1.31e-26	49.2752
KIF2C	-1.08634	2.63201	-11.337	1.03e-26	49.507
GKN2	1.50128	1.28555	11.3363	1.04e-26	49.501
DLC1	1.05218	2.53864	11.3694	7.7e-27	49.8004
CIP2A	-0.771078	1.6263	-11.4064	5.49e-27	50.1362
PLA2G4F	1.03488	1.4208	11.4155	5.05e-27	50.2185
SFTPD	2.16208	4.06834	11.4208	4.81e-27	50.2668
MCM6	-0.780706	3.87416	-11.4595	3.38e-27	50.6184
STIL	-0.649096	1.53962	-11.536	1.67e-27	51.3162
RFTN1	0.90475	3.60915	11.6383	6.5e-28	52.2532
ATOH8	1.25425	1.67221	11.6702	4.84e-28	52.547
KLF15	1.01031	1.55813	11.696	3.81e-28	52.7847
SLC2A1	-1.45326	4.38482	-11.8562	8.56e-29	54.2657
B3GNT8	1.21372	2.42831	11.9067	5.34e-29	54.735
PEBP4	1.96499	2.61688	11.9302	4.28e-29	54.9538
CALU	-0.76488	5.60107	-11.9492	3.58e-29	55.1304
SELENBP1	1.51192	5.23879	12.1445	5.68e-30	56.9597
ABCC6	0.902696	1.8115	12.209	3.08e-30	57.5673
MFSD2A	1.22781	3.26808	12.3033	1.25e-30	58.4596
SLC22A31	2.06871	4.43474	12.4223	4.02e-31	59.59
ANLN	-1.27609	2.9186	-12.5835	8.53e-32	61.1302
ST6GALNAC4	1.01844	3.88646	12.6569	4.2e-32	61.8347
AK1	0.920345	2.14623	12.8798	4.81e-33	63.9885
PGC	3.8051	4.21574	13.0213	1.2e-33	65.3654
C16orf89	2.68054	5.22003	13.2618	1.12e-34	67.7231
RHOBTB2	1.25993	3.42083	13.4205	2.32e-35	69.2897
SLC46A2	1.1318	1.03859	13.5153	9.01e-36	70.2302
ADGRD1	1.08956	1.44809	13.5035	1.01e-35	70.1131
CACNA2D2	1.98023	2.20573	16.0278	4.42e-47	96.1397
SFTPB	3.64783	9.34754	16.2957	2.51e-48	98.9969

## Sheet: C2 vs C3
	logFC	AveExpr	T	P.Value	B
SFTPB	1.32021	12.3333	16.625	1.2e-36	72.3771
EMC10	0.613568	3.84711	7.11925	3.5e-11	13.9323
DCXR	0.827081	5.17409	6.69617	3.47e-10	11.6713
PBXIP1	0.841034	6.24793	6.69433	3.5e-10	11.6617
PLD3	0.986563	6.82901	6.42328	1.46e-09	10.2543
LRPAP1	0.602907	4.08438	6.30139	2.76e-09	9.63245
GNB4	-0.629271	1.89574	-6.11698	7.09e-09	8.70549
CD300A	-0.844957	2.50396	-6.10886	7.39e-09	8.66503
APOL6	-0.73837	3.31148	-6.05981	9.48e-09	8.42153
FCGR3A	-1.22158	4.60222	-6.02661	1.12e-08	8.25743
SLC7A7	-0.868831	2.7169	-5.85827	2.6e-08	7.43407
TMEM9	0.731998	5.54604	5.77984	3.82e-08	7.05562
LPXN	-0.735661	3.33114	-5.7749	3.92e-08	7.03189
MARCKS	-0.75186	4.72501	-5.77398	3.94e-08	7.02744
GOLIM4	-0.588952	3.71366	-5.75932	4.23e-08	6.95714
GKN2	2.37568	2.87853	5.75719	4.27e-08	6.94692
SAMHD1	-0.835443	3.33694	-5.71901	5.15e-08	6.76436
CLIC4	-0.620624	5.07098	-5.71783	5.18e-08	6.75874
AGA	0.891605	4.17336	5.68026	6.22e-08	6.5799
DOCK11	-0.680286	1.94854	-5.66265	6.78e-08	6.49636
IDUA	0.726878	2.7497	5.6591	6.89e-08	6.47953
COLGALT1	-0.602869	4.36681	-5.65734	6.95e-08	6.47116
CD53	-0.996688	4.72336	-5.62106	8.29e-08	6.29969
PIK3AP1	-0.836882	2.3491	-5.60178	9.1e-08	6.20887
SLC22A31	1.12483	6.20273	5.53334	1.26e-07	5.88812
KRTCAP3	0.845816	5.26215	5.48939	1.56e-07	5.68354
LAIR1	-0.835029	2.33842	-5.46234	1.77e-07	5.55822
EPSTI1	-0.747808	2.16358	-5.46074	1.79e-07	5.55081
LILRB2	-0.708289	1.75234	-5.45579	1.83e-07	5.52793
PLEK	-0.955395	3.41723	-5.44325	1.94e-07	5.46998
FCER1G	-1.00958	5.38765	-5.43212	2.04e-07	5.41865
COTL1	-0.901193	4.25082	-5.43142	2.05e-07	5.41542
RNASE6	-0.879624	4.08403	-5.42428	2.12e-07	5.38255
LAPTM5	-1.02633	5.30216	-5.41405	2.23e-07	5.3355
PPP1R18	-0.730344	3.73588	-5.4022	2.35e-07	5.28104
HCLS1	-0.842316	3.63822	-5.40166	2.36e-07	5.27858
FGD3	-0.648288	1.81419	-5.39967	2.38e-07	5.26942
LILRB1	-0.627629	1.50233	-5.39704	2.41e-07	5.25738
PLXNC1	-0.610466	1.83902	-5.39693	2.41e-07	5.25685
SMPDL3B	1.03134	4.28459	5.39327	2.46e-07	5.24008
NENF	0.625019	5.83155	5.39016	2.49e-07	5.22581
GPRC5C	0.763303	4.36798	5.35901	2.88e-07	5.08329
CYTH4	-0.691974	2.10855	-5.35384	2.96e-07	5.05971
LINC02122	0.775396	0.812291	5.34107	3.14e-07	5.00151
FYB1	-0.745888	1.90188	-5.33423	3.24e-07	4.97033
CYTIP	-0.807331	2.64294	-5.32208	3.43e-07	4.91511
TSTD1	0.676839	5.07659	5.32046	3.46e-07	4.90773
NCKAP1L	-0.808769	2.30044	-5.31818	3.49e-07	4.89737
TNFSF13B	-0.804213	2.46627	-5.31221	3.59e-07	4.87027
SIRPA	-0.879293	3.32719	-5.29947	3.81e-07	4.81254
BCL2A1	-0.978178	3.04337	-5.28029	4.17e-07	4.72573
POLR3H	0.879583	2.48244	5.27133	4.34e-07	4.68527
TCF19	-0.602183	2.51115	-5.26525	4.47e-07	4.65783
PLEKHO1	-0.638899	2.78162	-5.25499	4.68e-07	4.6116
DOCK10	-0.627406	1.59353	-5.25437	4.7e-07	4.60882
LCP2	-0.69932	2.4585	-5.25326	4.72e-07	4.60383
FPR3	-0.976736	3.28783	-5.2502	4.79e-07	4.59005
SIGLEC10	-0.60916	1.38573	-5.24475	4.91e-07	4.56554
RHOBTB2	0.884776	4.5373	5.23258	5.2e-07	4.51083
PLSCR1	-0.621709	3.79424	-5.23072	5.24e-07	4.50248
C1QC	-1.13961	6.67977	-5.23012	5.25e-07	4.49978
PDIA3	0.711324	7.43598	5.22506	5.38e-07	4.47711
CXCL10	-1.28317	3.40666	-5.20546	5.89e-07	4.3893
LILRB3	-0.688358	1.81087	-5.19912	6.06e-07	4.36095
C16orf89	1.31258	7.48211	5.19853	6.08e-07	4.3583
LCP1	-0.965508	4.89205	-5.18985	6.33e-07	4.31955
LRRC25	-0.74787	2.14958	-5.18846	6.37e-07	4.31333
GAL3ST4	-0.629822	1.96219	-5.18295	6.53e-07	4.28876
HAVCR2	-0.851005	2.7932	-5.18147	6.57e-07	4.28217
TFRC	-0.761744	3.67138	-5.18021	6.61e-07	4.27652
FERMT3	-0.845835	3.48924	-5.16552	7.07e-07	4.21112
C3AR1	-0.812824	2.65425	-5.14457	7.78e-07	4.11804
WAS	-0.770994	2.89577	-5.14188	7.88e-07	4.10612
RORC	0.739481	3.66299	5.12028	8.69e-07	4.01046
PLA2G10	1.46717	3.39439	5.11828	8.77e-07	4.00163
BIN2	-0.675325	2.05502	-5.09435	9.78e-07	3.89604
GBP1	-0.906488	3.17497	-5.08901	1e-06	3.87256
CD86	-0.763751	2.43403	-5.08314	1.03e-06	3.8467
CBR1	1.75624	5.57306	5.08094	1.04e-06	3.83701
ARHGAP30	-0.7931	3.0272	-5.06251	1.13e-06	3.7561
AIF1	-0.894016	4.43873	-5.05885	1.15e-06	3.74006
CORO1A	-0.817014	3.74186	-5.05868	1.15e-06	3.73932
IL1B	-0.746871	1.44989	-5.04583	1.22e-06	3.68307
CYBB	-1.10461	4.21489	-5.04451	1.23e-06	3.6773
SAMD9L	-0.819153	2.36569	-5.04098	1.25e-06	3.66184
MPP1	-0.715747	2.40115	-5.02331	1.35e-06	3.58468
PTPRC	-0.917566	3.00037	-5.01736	1.38e-06	3.55878
PIGT	0.586045	3.50572	5.01188	1.42e-06	3.53492
GUCY1A1	-0.598843	1.98096	-5.01155	1.42e-06	3.53347
LSP1	-0.770285	2.93435	-5.00346	1.47e-06	3.49829
IL18BP	-0.616924	2.46959	-4.99918	1.5e-06	3.47966
APOL3	-0.765516	2.58769	-4.99426	1.54e-06	3.45831
MPEG1	-0.901667	3.29725	-4.98648	1.59e-06	3.42452
PCSK2	2.40361	1.85339	4.95777	1.81e-06	3.30029
SYBU	1.2587	2.52832	4.95103	1.86e-06	3.27117
SFTA2	0.887219	7.41795	4.93184	2.03e-06	3.18849
INPP5D	-0.718419	2.34163	-4.92619	2.08e-06	3.16423
SASH3	-0.838679	3.07765	-4.92442	2.1e-06	3.1566
FOLR1	1.46234	7.0151	4.91713	2.17e-06	3.12527
SLC26A9	1.45448	3.77689	4.90349	2.3e-06	3.0668
NQO1	1.62799	5.71081	4.88571	2.49e-06	2.99074
ARHGEF6	-0.683282	2.487	-4.88284	2.52e-06	2.97846
G0S2	-1.15635	3.9496	-4.88271	2.52e-06	2.97793
RUNX3	-0.735688	2.1083	-4.8772	2.58e-06	2.95441
ZNF486	-1.14012	1.93882	-4.8705	2.66e-06	2.92583
LAT2	-0.65197	2.15169	-4.8406	3.03e-06	2.79867
MMP14	-0.746899	5.4397	-4.83381	3.13e-06	2.76987
OASL	-0.76944	1.68571	-4.82659	3.23e-06	2.73928
IRF8	-0.802776	2.54904	-4.81682	3.37e-06	2.69792
GBP5	-0.749052	1.53231	-4.80211	3.59e-06	2.63582
CSF1R	-0.881386	3.7805	-4.80021	3.62e-06	2.62778
C1QB	-1.13484	6.75547	-4.79642	3.68e-06	2.61182
TPM1	-0.606522	2.99188	-4.79538	3.7e-06	2.60742
TAGAP	-0.614406	1.73185	-4.79413	3.72e-06	2.60218
FUOM	-0.671282	2.44344	-4.79202	3.75e-06	2.5933
C1GALT1	-0.648452	2.65878	-4.79008	3.78e-06	2.5851
VCAM1	-0.773916	2.23394	-4.78935	3.8e-06	2.58206
IL4I1	-0.872117	2.24569	-4.78878	3.81e-06	2.57963
SLAMF8	-0.63398	1.43095	-4.78656	3.84e-06	2.57028
C1QA	-1.07623	6.84219	-4.78336	3.9e-06	2.55684
ITGB2	-1.05114	4.53445	-4.78044	3.95e-06	2.54457
MS4A6A	-0.82684	3.09657	-4.77879	3.98e-06	2.53761
IL10RA	-0.692752	2.42208	-4.7648	4.22e-06	2.47891
GSTP1	0.664392	8.76812	4.75638	4.38e-06	2.4436
RENBP	-0.762178	3.02881	-4.74717	4.56e-06	2.40508
IRF5	-0.628607	2.23644	-4.74327	4.64e-06	2.38874
SLC15A3	-0.742593	2.78553	-4.73317	4.84e-06	2.3466
GLIPR2	-0.822252	3.32296	-4.73218	4.87e-06	2.34247
PTAFR	-0.840462	2.79737	-4.72908	4.93e-06	2.32951
ARRDC4	-0.658481	2.68121	-4.72449	5.03e-06	2.3104
CMKLR1	-0.695582	2.01072	-4.72436	5.03e-06	2.30985
PLEKHO2	-0.593537	3.61546	-4.72182	5.09e-06	2.29925
HCK	-0.894583	3.30688	-4.71683	5.2e-06	2.27849
ATP1B1	0.931659	7.8952	4.71396	5.26e-06	2.26653
RAB42	-0.609153	1.78992	-4.71225	5.3e-06	2.25943
ALOX5AP	-1.01684	4.30346	-4.70731	5.42e-06	2.23892
IL2RB	-0.768407	2.25277	-4.69925	5.61e-06	2.20542
GPR137B	-0.641777	3.11888	-4.69899	5.61e-06	2.20434
CD274	-0.65326	1.5383	-4.69853	5.62e-06	2.20245
SIGLEC9	-0.589369	1.45903	-4.69469	5.72e-06	2.1865
BHLHE41	-0.763605	2.13348	-4.6892	5.85e-06	2.16374
PSMB9	-0.79222	3.67234	-4.68635	5.93e-06	2.15193
RARRES1	-0.889609	3.08153	-4.68002	6.09e-06	2.12575
SPI1	-0.904356	4.16284	-4.67549	6.21e-06	2.10701
SCD5	-0.774176	1.93494	-4.65712	6.72e-06	2.0312
ARHGAP9	-0.592053	1.76731	-4.65519	6.77e-06	2.02322
OAS2	-0.85573	3.20195	-4.65418	6.8e-06	2.01906
CCR5	-0.658977	1.90226	-4.65165	6.88e-06	2.00863
GRK3	-0.610435	2.2723	-4.65149	6.88e-06	2.008
DOCK2	-0.618093	1.76261	-4.65086	6.9e-06	2.00539
EVI2B	-0.771094	3.3339	-4.64591	7.05e-06	1.98503
MYO1F	-0.640662	2.27234	-4.64326	7.13e-06	1.97411
GIMAP4	-0.672788	3.75752	-4.64274	7.14e-06	1.97199
SIGLEC14	-0.649297	1.4717	-4.64018	7.22e-06	1.96147
IQGAP2	-0.732618	1.783	-4.63604	7.35e-06	1.94445
STAB1	-0.705636	2.70946	-4.63493	7.38e-06	1.93988
EPHX1	1.07251	7.63812	4.63268	7.45e-06	1.93064
ORM2	1.51099	2.69495	4.62255	7.78e-06	1.88909
HENMT1	-0.654	1.6999	-4.6082	8.27e-06	1.83034
BTK	-0.667259	1.92819	-4.60581	8.36e-06	1.82057
CCL8	-0.875854	1.70085	-4.60476	8.39e-06	1.81628
PALM2AKAP2	-0.603447	2.32728	-4.60436	8.41e-06	1.81468
AOAH	-0.655951	1.8359	-4.59981	8.57e-06	1.7961
MSR1	-0.939369	2.70039	-4.59915	8.6e-06	1.79339
ABI3	-0.608385	2.79832	-4.59545	8.73e-06	1.77828
EBPL	0.61294	4.53487	4.5952	8.74e-06	1.77726
PLIN2	-0.76457	3.52189	-4.58541	9.11e-06	1.73735
SELPLG	-0.746492	3.70727	-4.58466	9.14e-06	1.73428
CCRL2	-0.649625	1.79424	-4.56038	1.01e-05	1.63562
TAP1	-0.693792	4.20653	-4.55834	1.02e-05	1.62732
CD163	-1.05002	3.53517	-4.55606	1.03e-05	1.61808
LILRB4	-0.777988	2.12694	-4.55114	1.05e-05	1.59817
CD6	-0.610151	1.70346	-4.5486	1.06e-05	1.58788
ALCAM	0.625333	5.23863	4.54296	1.09e-05	1.56507
LIMD2	-0.632313	2.58553	-4.54186	1.09e-05	1.56062
NAPSA	0.799514	8.4373	4.53961	1.1e-05	1.5515
CCL4L2	-0.75466	1.78127	-4.5259	1.17e-05	1.49616
AKR1C1	2.26284	3.18864	4.5203	1.2e-05	1.4736
CCL4	-0.76619	2.27937	-4.51965	1.2e-05	1.47098
PAPSS2	-0.809444	4.28162	-4.51789	1.21e-05	1.4639
CD84	-0.668095	1.78861	-4.51767	1.21e-05	1.46299
KCTD12	-0.757781	4.13301	-4.51739	1.21e-05	1.46188
CCL2	-0.971445	4.03828	-4.51383	1.23e-05	1.44754
CPVL	-0.944383	3.1689	-4.50514	1.28e-05	1.41259
ITGAX	-0.827823	2.69753	-4.50494	1.28e-05	1.41181
SNX10	-0.647344	2.51913	-4.50014	1.3e-05	1.39251
HSD11B1	-0.613917	1.94633	-4.49692	1.32e-05	1.3796
CDH15	0.630439	1.34772	4.49486	1.33e-05	1.37135
UBE2L6	-0.653218	5.20133	-4.49367	1.34e-05	1.36657
SLA	-0.649134	2.27277	-4.49277	1.34e-05	1.36295
STMN1	-0.589369	3.83603	-4.48942	1.36e-05	1.34954
RNF145	0.67386	6.10769	4.48137	1.41e-05	1.31729
DDX60	-0.657695	2.43087	-4.46891	1.48e-05	1.26747
ITGA2	-0.997169	2.99402	-4.46848	1.49e-05	1.26575
CST3	0.586449	6.9557	4.46789	1.49e-05	1.26339
WIPF1	-0.588755	2.8453	-4.46289	1.52e-05	1.24345
PILRA	-0.713441	2.44171	-4.46147	1.53e-05	1.23779
CLEC2B	-0.722331	2.24905	-4.46138	1.53e-05	1.23742
NCEH1	-0.609362	3.07429	-4.45943	1.54e-05	1.22964
NCF2	-0.815258	3.64994	-4.45465	1.57e-05	1.21062
ALDH6A1	0.601703	3.02738	4.45372	1.58e-05	1.20689
C1orf162	-0.772482	2.93324	-4.45011	1.6e-05	1.19252
MMP12	-1.35402	2.46127	-4.44793	1.62e-05	1.18386
CLPSL2	0.804899	0.665	4.44781	1.62e-05	1.18338
APBB1IP	-0.618736	2.43943	-4.44692	1.63e-05	1.17982
MS4A4A	-0.804367	2.90556	-4.43571	1.7e-05	1.13527
AKR1C2	2.48187	3.04145	4.43491	1.71e-05	1.13213
CD4	-0.734692	4.50681	-4.42629	1.77e-05	1.09794
ID2	-0.672692	4.24755	-4.41991	1.82e-05	1.07266
HOPX	1.14242	5.90542	4.41746	1.84e-05	1.06295
SLCO2B1	-0.835323	3.03538	-4.41342	1.87e-05	1.04698
GPCPD1	-0.653788	3.59653	-4.4083	1.91e-05	1.02672
CCL3L3	-0.604051	1.05361	-4.40829	1.91e-05	1.02672
CDK2AP2	0.625604	6.15084	4.39623	2e-05	0.979112
BMP5	-0.811712	2.22113	-4.39471	2.02e-05	0.973122
SLC16A12	0.838064	0.804037	4.39354	2.03e-05	0.968498
TYROBP	-0.916711	6.09464	-4.39097	2.05e-05	0.958393
FGL2	-0.730105	2.60252	-4.38863	2.07e-05	0.949145
NEDD4L	0.590167	2.47657	4.38174	2.13e-05	0.922056
TNFAIP3	-0.758349	3.27344	-4.3795	2.15e-05	0.913262
NCF4	-0.709564	2.96944	-4.37608	2.18e-05	0.899819
FYN	-0.608833	2.65694	-4.37586	2.18e-05	0.898953
BATF2	-0.616862	2.23533	-4.36931	2.24e-05	0.873229
FAM83D	-0.779714	1.94579	-4.36877	2.24e-05	0.87111
AVPI1	0.698412	4.46671	4.36781	2.25e-05	0.867356
MNDA	-0.835958	3.10654	-4.36761	2.25e-05	0.866579
DOK2	-0.829429	3.0293	-4.3616	2.31e-05	0.843008
HAPLN3	-0.614886	2.07788	-4.35185	2.4e-05	0.804822
CD96	-0.664148	1.52916	-4.34944	2.43e-05	0.7954
BNIPL	0.974728	2.15328	4.34726	2.45e-05	0.786885
TNFAIP8L2	-0.677034	2.46595	-4.32076	2.73e-05	0.683606
LILRA5	-0.585027	1.27476	-4.31046	2.84e-05	0.643586
GGT6	1.03337	2.48905	4.30945	2.85e-05	0.639655
DAB2	-0.638575	3.13042	-4.30287	2.93e-05	0.614132
CD14	-0.765718	5.49001	-4.29848	2.98e-05	0.59712
TALDO1	0.713691	6.43617	4.28592	3.14e-05	0.548517
TRPV2	-0.616188	2.71461	-4.28107	3.2e-05	0.529798
CSF2RB	-0.675599	2.45016	-4.28085	3.2e-05	0.52896
STAT1	-0.63404	4.68241	-4.27796	3.24e-05	0.517806
CSF1	-0.790701	3.50395	-4.27653	3.26e-05	0.512266
HERC5	-0.594887	1.57427	-4.27539	3.27e-05	0.507868
SLC1A1	-0.835884	2.24051	-4.2703	3.34e-05	0.488276
RTP4	-0.629986	2.06424	-4.26944	3.35e-05	0.484957
IFIT2	-0.705407	2.39428	-4.26416	3.43e-05	0.464635
IFIH1	-0.63446	2.75794	-4.2635	3.43e-05	0.462071
DOCK8	-0.589433	2.11617	-4.25669	3.53e-05	0.435878
SAMD9	-0.607188	1.93283	-4.2547	3.56e-05	0.428254
TNC	-1.39294	3.83265	-4.24803	3.65e-05	0.402622
SAMSN1	-0.640418	1.83113	-4.24392	3.72e-05	0.386862
ZBED2	-0.595841	1.11225	-4.23198	3.9e-05	0.341152
MMD	-0.658571	2.61363	-4.22697	3.98e-05	0.321978
OR2I1P	-0.730267	1.33955	-4.22504	4.01e-05	0.314616
CLEC7A	-0.731319	2.45392	-4.22267	4.04e-05	0.305548
TMEM92	0.723645	3.05268	4.21882	4.11e-05	0.290886
BCAM	0.673937	6.40906	4.21553	4.16e-05	0.278326
AL391427.1	1.06473	1.06009	4.21517	4.17e-05	0.276947
FN1	-0.813104	6.50665	-4.21268	4.21e-05	0.267463
NFAM1	-0.623072	1.80908	-4.20866	4.28e-05	0.252137
CD300C	-0.635884	1.58127	-4.19584	4.5e-05	0.203377
ADRB2	-0.729861	2.04121	-4.19335	4.55e-05	0.193929
ALDH3A2	0.780296	4.13387	4.19239	4.56e-05	0.190253
PARM1	0.836505	5.78715	4.19237	4.56e-05	0.190173
PLA2G7	-0.833929	2.81054	-4.18047	4.78e-05	0.145066
SELENBP1	0.800918	6.52671	4.17959	4.8e-05	0.141738
ABCA1	-0.595908	2.44429	-4.1789	4.81e-05	0.139098
GBP4	-0.711815	2.77155	-4.17864	4.82e-05	0.138136
SLC43A3	-0.659871	3.48638	-4.1784	4.82e-05	0.137215
CDCA5	-0.622889	1.83277	-4.17689	4.85e-05	0.131508
GPNMB	-0.974345	5.01277	-4.16693	5.05e-05	0.0938398
PLAC8	-0.907171	2.0425	-4.15953	5.2e-05	0.0658984
MS4A7	-0.814605	2.91885	-4.15395	5.31e-05	0.044846
ORM1	1.46751	3.33823	4.15309	5.33e-05	0.0416106
VCAN	-0.885977	2.98601	-4.14623	5.48e-05	0.0158017
ARHGAP4	-0.655637	2.84996	-4.14187	5.57e-05	-0.000613748
GZMA	-0.830974	2.98946	-4.13953	5.62e-05	-0.00939592
ITGAL	-0.629488	2.04356	-4.13889	5.64e-05	-0.011818
IGSF6	-0.696914	2.77757	-4.13236	5.78e-05	-0.0363521
MUC1	0.663282	7.90861	4.12943	5.85e-05	-0.0473126
EMP3	-0.632269	4.2067	-4.12878	5.87e-05	-0.0497663
PKDCC	-0.790729	1.85093	-4.12734	5.9e-05	-0.0551545
ODC1	1.38897	6.58067	4.12252	6.01e-05	-0.0732164
RRAGD	-0.604326	2.44602	-4.10439	6.45e-05	-0.141025
WARS1	-0.632808	4.89041	-4.10344	6.48e-05	-0.144559
LHFPL2	-0.608468	2.81728	-4.09478	6.7e-05	-0.176863
KCNE4	1.30052	2.54814	4.08953	6.84e-05	-0.196396
NPAS3	0.751528	0.606782	4.08683	6.91e-05	-0.206435
C1orf53	0.613389	2.904	4.08133	7.06e-05	-0.226891
SLC16A4	1.11845	3.60603	4.07514	7.23e-05	-0.249896
SCNN1A	0.847445	6.22827	4.07108	7.35e-05	-0.264941
TRIM16L	0.828317	1.70876	4.05757	7.74e-05	-0.314952
AC023421.1	1.65233	1.87568	4.05594	7.79e-05	-0.320988
SRGN	-0.769628	6.4824	-4.05007	7.97e-05	-0.342679
RAP1GAP	0.827455	4.50223	4.04854	8.02e-05	-0.348317
ISLR	-0.769713	4.25138	-4.04552	8.11e-05	-0.359451
MKI67	-0.674452	1.92839	-4.04219	8.22e-05	-0.371743
HPN	0.810416	4.3324	4.04117	8.25e-05	-0.375514
NEURL1B	-0.661159	2.59299	-4.04088	8.26e-05	-0.376569
ALOX5	-0.838305	3.66421	-4.0399	8.29e-05	-0.380178
ATAD2	-0.612705	2.42362	-4.03959	8.3e-05	-0.381347
CLMP	-0.588567	1.531	-4.03925	8.31e-05	-0.38258
RASSF2	-0.603695	2.79392	-4.03557	8.43e-05	-0.396135
SLC5A1	-0.668856	0.838338	-4.03503	8.45e-05	-0.39811
SEMA3C	-0.648398	2.70921	-4.02419	8.81e-05	-0.437991
NCOA7	-0.755642	4.31732	-4.02196	8.89e-05	-0.44618
TMEM59L	1.60849	2.95508	4.01058	9.29e-05	-0.487891
TNFAIP2	-0.940258	4.26534	-4.00939	9.33e-05	-0.492267
TGM2	-0.7099	5.63839	-4.00763	9.39e-05	-0.498718
SIGLEC1	-0.815548	2.14556	-4.00698	9.41e-05	-0.501092
SLC6A20	-0.60915	0.708134	-3.9988	9.72e-05	-0.53099
CD7	-0.654971	2.02936	-3.99747	9.76e-05	-0.535858
IRX3	0.739399	4.74871	3.99524	9.85e-05	-0.543999
IL32	-0.726707	4.26864	-3.99317	9.93e-05	-0.551566
IFIT3	-0.718911	3.85665	-3.99058	0.000100263	-0.561
IL7R	-0.840401	3.02556	-3.97526	0.000106316	-0.6168
GMFG	-0.592987	3.9835	-3.97171	0.000107767	-0.629703
PGD	0.753597	6.0878	3.97123	0.000107968	-0.631469
CSTA	-0.701627	2.22525	-3.96433	0.000110846	-0.656507
PKIG	-0.652848	3.82081	-3.95985	0.000112759	-0.672781
CCR1	-0.695982	2.78844	-3.95819	0.000113472	-0.678783
ITGB8	-0.608232	0.940504	-3.95681	0.000114069	-0.683771
RGL1	-0.585229	3.22103	-3.95149	0.000116405	-0.703057
SPN	-0.660612	2.02477	-3.947	0.000118409	-0.719288
LCK	-0.633879	2.1613	-3.94681	0.000118494	-0.719972
FGR	-0.71369	2.78391	-3.93596	0.000123477	-0.759142
HLA-DMB	-0.798428	3.77429	-3.93349	0.00012464	-0.768055
PANX2	0.82743	2.38454	3.93262	0.000125055	-0.771211
KLF15	0.715178	2.45453	3.93178	0.000125449	-0.774206
CLIC3	1.07529	4.46574	3.92859	0.000126979	-0.78573
IRS1	-0.653938	2.07494	-3.92432	0.000129047	-0.80108
TMEM150B	-0.593247	1.3474	-3.91681	0.000132764	-0.828069
CD5	-0.666266	2.04927	-3.91678	0.00013278	-0.828187
CBR3	0.888707	1.59025	3.91469	0.000133835	-0.835706
PNMA2	0.625815	2.90262	3.91021	0.000136119	-0.851784
CD2	-0.751568	3.39407	-3.90758	0.000137474	-0.861197
CXCL11	-0.652061	1.28862	-3.89899	0.000142001	-0.891972
CD52	-0.893359	4.84856	-3.8979	0.000142588	-0.895895
NR0B1	0.995367	0.647759	3.89435	0.000144507	-0.908589
IFI44L	-0.83559	1.72111	-3.88723	0.00014843	-0.934029
SULF1	-0.892979	3.10487	-3.88057	0.000152192	-0.957791
TMPRSS13	0.608426	2.6952	3.87102	0.000157744	-0.991807
GPR34	-0.602536	2.16766	-3.86609	0.000160684	-1.00933
RNU6-403P	1.25053	3.17293	3.86015	0.000164297	-1.03043
NMB	0.734166	3.09429	3.85351	0.000168427	-1.05399
CXCR4	-0.719503	5.1238	-3.85212	0.000169303	-1.05891
GZMB	-0.739073	2.14927	-3.84674	0.000172736	-1.07796
OSGIN1	0.86876	2.03088	3.84429	0.000174321	-1.08662
CXXC4	0.633242	1.42488	3.84417	0.000174402	-1.08706
CYP4F11	0.98847	1.26205	3.83883	0.000177907	-1.10593
SLC2A3	-0.760145	2.97077	-3.83831	0.000178249	-1.10775
PAX7	1.19889	1.03213	3.83479	0.000180604	-1.1202
TGFBI	-0.753906	4.18305	-3.83279	0.00018195	-1.12724
PLBD1	-0.676726	3.26144	-3.83214	0.000182393	-1.12954
MEIS3P2	0.585181	1.10224	3.83121	0.000183023	-1.13281
CDK1	-0.630169	2.31154	-3.83088	0.000183253	-1.134
PKP1	1.44325	2.03734	3.8286	0.000184807	-1.14201
LAG3	-0.603025	1.42832	-3.82717	0.000185795	-1.14707
RSAD2	-0.649731	2.02538	-3.81819	0.000192095	-1.17868
MELK	-0.614015	1.59164	-3.81726	0.000192761	-1.18196
ASF1B	-0.621672	2.63084	-3.8146	0.000194673	-1.19131
CXCL9	-1.0787	3.50268	-3.81335	0.000195579	-1.19571
MGST1	0.72629	5.36771	3.81332	0.000195599	-1.19581
IL2RG	-0.598528	2.24511	-3.80981	0.000198158	-1.20813
GREB1	0.711366	1.07897	3.79672	0.000207991	-1.25401
NEDD9	0.722747	4.0985	3.78371	0.000218229	-1.29952
OAS3	-0.620214	3.50578	-3.78314	0.000218687	-1.30151
ITGAM	-0.700478	2.49047	-3.78097	0.00022044	-1.30906
CA8	0.638324	1.00968	3.77996	0.00022126	-1.31258
TSPAN11	1.0465	2.40081	3.7764	0.000224185	-1.32501
CD37	-0.678841	3.01858	-3.77455	0.000225718	-1.33147
TNNI2	-0.615999	1.22355	-3.7725	0.00022742	-1.33858
MXRA5	-0.764152	2.83658	-3.76832	0.000230947	-1.35314
HK3	-0.779875	2.1846	-3.76602	0.00023291	-1.36116
FASN	0.894981	5.40669	3.76339	0.000235169	-1.37029
PLK2	-0.648358	3.27054	-3.76234	0.000236078	-1.37394
COLEC12	-0.770671	2.7046	-3.76041	0.000237758	-1.38065
WNT4	0.693329	1.61428	3.75604	0.000241595	-1.3958
DSCAM-AS1	1.85864	1.97625	3.75352	0.000243835	-1.40453
MTARC1	0.615009	1.75465	3.75349	0.000243865	-1.40465
CD83	-0.644939	3.58031	-3.74855	0.00024832	-1.42178
TNFRSF19	-0.740371	2.75626	-3.74614	0.000250517	-1.43011
ANGPTL2	-0.638987	3.41723	-3.73655	0.000259461	-1.46329
PDPN	-0.7297	2.5105	-3.73223	0.000263586	-1.4782
SCGB3A2	1.91674	7.97331	3.72872	0.00026698	-1.4903
CDCA7	-0.904762	2.29464	-3.72569	0.000269951	-1.50076
VAV1	-0.617544	2.56789	-3.72311	0.000272502	-1.50965
EGR2	-0.658741	2.12338	-3.72165	0.00027395	-1.51466
UGDH	0.904856	4.86652	3.71534	0.000280317	-1.53638
IRX5	0.644618	3.17948	3.7139	0.000281793	-1.54134
EMILIN1	-0.668084	4.12577	-3.71104	0.000284733	-1.55115
GPR68	-0.746009	2.14443	-3.70442	0.000291666	-1.57388
HGD	1.29663	2.47806	3.70018	0.000296185	-1.58841
TOP2A	-0.77196	3.09471	-3.69415	0.000302733	-1.60906
RNASE2	-0.585602	1.33169	-3.69043	0.00030684	-1.62179
AQP9	-0.706308	1.75051	-3.68948	0.000307893	-1.62502
VSIG4	-0.902572	3.98834	-3.67824	0.000320662	-1.66339
LST1	-0.687792	2.91991	-3.67369	0.000325969	-1.67888
GSR	0.607054	4.93279	3.67155	0.000328503	-1.6862
PLAAT4	-0.901725	5.47174	-3.6685	0.00033213	-1.69656
TPX2	-0.728382	2.71097	-3.66654	0.000334482	-1.70322
KCNJ15	-0.962097	2.65597	-3.65931	0.000343301	-1.72778
ABCG1	-0.629016	2.91154	-3.65911	0.000343556	-1.72848
BCAS1	0.901002	1.67946	3.65079	0.000353983	-1.75668
SELL	-0.721808	2.68796	-3.65013	0.000354821	-1.75891
MYBL2	-0.923546	2.72348	-3.6418	0.000365579	-1.78708
AMIGO2	-0.768465	3.37276	-3.63709	0.000371803	-1.803
UBE2C	-0.945534	3.3683	-3.63401	0.000375925	-1.81339
PIM2	-0.642935	4.39667	-3.62671	0.000385878	-1.83803
OLR1	-0.91944	3.2077	-3.62658	0.000386053	-1.83846
MDK	0.820895	6.64187	3.61544	0.000401711	-1.87592
CYP2B7P	1.08779	5.54678	3.61497	0.000402395	-1.87753
IFI44	-0.83661	3.59276	-3.61214	0.000406464	-1.887
FOXC1	-0.623272	1.62005	-3.60849	0.000411786	-1.89926
ANKRD1	-0.683819	0.902611	-3.59253	0.000435821	-1.95269
IFIT1	-0.864214	2.59865	-3.58438	0.000448611	-1.97992
CD40	-0.649184	3.50806	-3.57754	0.000459609	-2.00271
CDC25B	-0.62595	4.59721	-3.57317	0.000466757	-2.01723
DPYD	-0.69006	3.00337	-3.57238	0.000468073	-2.01988
CD3E	-0.666359	3.01088	-3.57218	0.000468396	-2.02053
TRBD1	-0.99069	2.54834	-3.56927	0.000473247	-2.03023
TRAC	-0.771767	4.68389	-3.56195	0.000485633	-2.05453
RGS1	-0.879817	4.09639	-3.55631	0.000495383	-2.07323
APOE	-0.869506	6.54431	-3.55119	0.000504379	-2.09015
CASP1	-0.593849	2.83209	-3.5491	0.000508107	-2.09707
BHMT2	1.11145	1.58837	3.5477	0.000510617	-2.10171
HMOX1	-0.676723	4.73043	-3.54454	0.000516326	-2.11216
CCN1	-0.826134	5.20173	-3.54243	0.000520164	-2.11912
SLC4A4	-0.626713	2.23013	-3.53982	0.000524954	-2.12774
CACNA2D2	0.911363	3.86523	3.53738	0.000529478	-2.1358
KIFC1	-0.603401	2.30927	-3.52379	0.000555281	-2.18051
SFTA1P	1.00484	3.24106	3.52132	0.000560119	-2.18866
NKG7	-0.713364	2.98627	-3.51858	0.000565506	-2.19765
WFDC2	0.701996	8.56808	3.51633	0.000569959	-2.20502
PHACTR3	0.855024	1.45632	3.5033	0.00059647	-2.24771
HLA-DQA1	-0.918258	4.9235	-3.49896	0.00060555	-2.26189
CD69	-0.673512	2.10885	-3.49878	0.000605935	-2.26249
SIK1B	0.775907	2.44995	3.49543	0.000613033	-2.27342
AURKA	-0.625596	2.39576	-3.49127	0.00062196	-2.28699
FBLN1	-0.738339	4.13191	-3.49089	0.00062279	-2.28824
AMBP	1.06815	1.76187	3.48225	0.00064175	-2.31638
PDE4D	0.66719	2.58686	3.48006	0.000646653	-2.32352
CCDC80	-0.656972	2.91288	-3.47922	0.000648523	-2.32623
MRC2	-0.614169	4.12895	-3.47832	0.000650554	-2.32916
SLC11A1	-0.657232	2.15906	-3.4722	0.000664496	-2.34905
NFKBIZ	-0.649681	3.10833	-3.47039	0.000668677	-2.35493
AC129507.4	0.888076	1.23691	3.46966	0.000670366	-2.35729
AL590666.2	0.663935	1.21173	3.46651	0.000677713	-2.36751
PRR15L	0.671265	5.71852	3.46439	0.000682686	-2.37437
LINC01871	-0.588195	1.69945	-3.46316	0.000685589	-2.37835
SLC5A8	-0.711369	0.853328	-3.45537	0.000704288	-2.40357
ANKRD22	-0.894418	2.23162	-3.45095	0.000715082	-2.41782
GJA1	-0.684512	4.51713	-3.45009	0.000717206	-2.4206
MSLN	1.95836	6.6519	3.44537	0.000728974	-2.43585
SLC14A2	1.04446	1.291	3.44404	0.000732304	-2.44012
SDS	-0.65307	1.72014	-3.43549	0.000754157	-2.46767
ADORA1	-0.644722	1.24091	-3.42581	0.000779609	-2.49875
MX1	-0.768408	3.21663	-3.42478	0.00078237	-2.50206
SPP1	-1.22144	5.97295	-3.41674	0.000804211	-2.52783
HAS3	-0.971503	2.97524	-3.41203	0.000817254	-2.54289
TREM2	-0.769495	4.20729	-3.40609	0.000834009	-2.56187
APOC1	-0.87038	4.50438	-3.40209	0.000845462	-2.57463
PXDN	-0.609729	3.01117	-3.40145	0.000847288	-2.57665
NTN4	-0.627812	3.6026	-3.40051	0.000850023	-2.57967
RTKN2	-0.60837	1.28926	-3.39992	0.000851725	-2.58154
C2	0.683128	3.24979	3.3995	0.000852947	-2.58288
LRP2	-0.670925	1.27097	-3.39885	0.000854839	-2.58495
EPHX3	0.701013	3.20899	3.39834	0.000856334	-2.58659
PGC	2.44947	7.54333	3.39331	0.000871127	-2.6026
APOD	1.21438	4.33507	3.39236	0.000873949	-2.60563
AL365181.3	0.903787	1.62651	3.38203	0.000905157	-2.63843
OSM	-0.651489	1.68377	-3.37749	0.000919204	-2.65282
C5AR1	-0.673677	2.99891	-3.37107	0.000939447	-2.67318
C9orf152	0.631466	3.56164	3.36832	0.000948212	-2.68186
SPOCK2	-0.6629	3.47011	-3.36806	0.000949038	-2.68267
AL365361.1	-0.71041	2.15652	-3.35558	0.000989949	-2.72209
RHBDL1	0.605431	2.08207	3.35164	0.00100318	-2.73449
LRRC31	-0.760604	1.3316	-3.34648	0.00102079	-2.75073
SLPI	1.26651	8.95176	3.34444	0.00102779	-2.75712
MMP7	-1.08002	3.76834	-3.34303	0.00103271	-2.76157
NMRAL2P	0.672722	0.824673	3.34075	0.00104067	-2.76873
PLA2G2A	-1.07244	1.63646	-3.3385	0.00104857	-2.77579
AMN	0.656934	1.74876	3.33269	0.00106922	-2.79399
AC026785.3	0.614006	0.542303	3.32908	0.00108227	-2.80531
CXCL12	-0.587294	2.5054	-3.3261	0.00109315	-2.81464
MMP2	-0.649369	5.47622	-3.32602	0.00109342	-2.81487
APOL1	-0.609748	5.0714	-3.31452	0.00113636	-2.85079
FMO2	-0.654452	2.45457	-3.3123	0.00114481	-2.8577
NPW	0.94607	1.34802	3.31062	0.00115127	-2.86295
GLTPD2	0.675348	1.53423	3.30772	0.00116246	-2.87196
SCNN1B	0.693552	4.68868	3.30572	0.00117025	-2.87819
ABCC3	0.779815	4.77831	3.30271	0.00118208	-2.88756
NBL1	-0.635101	5.11152	-3.29833	0.00119945	-2.90115
RASD1	1.14507	5.69836	3.29775	0.00120177	-2.90295
LINC02257	0.766571	1.76248	3.29725	0.00120378	-2.90451
TRBJ1-6	-0.718083	1.75159	-3.28514	0.00125327	-2.94204
THBS2	-0.730595	2.66979	-3.28464	0.00125535	-2.94358
LGALS4	-1.29223	1.72108	-3.2812	0.00126977	-2.95422
AURKB	-0.6091	1.91345	-3.27793	0.0012836	-2.96431
EIF4EBP1	-0.682032	4.73362	-3.27685	0.0012882	-2.96764
FPR1	-0.585628	2.27763	-3.27532	0.00129478	-2.97238
AL365181.2	0.679384	0.886886	3.27312	0.00130423	-2.97915
SOX9	-0.861062	2.50252	-3.26147	0.00135549	-3.01502
SERPINF1	-0.844834	5.26951	-3.25293	0.00139427	-3.04126
TACC2	0.656362	3.22055	3.25244	0.0013965	-3.04275
CD3D	-0.630942	3.31467	-3.24791	0.00141752	-3.05664
TRBC2	-0.696423	4.52945	-3.24578	0.00142747	-3.06315
PTTG1	-0.642664	3.01112	-3.22993	0.00150381	-3.11157
G6PD	0.711974	4.87679	3.22041	0.00155146	-3.14055
IRS2	0.720313	3.17105	3.20892	0.00161086	-3.17544
OSCAR	-0.679722	2.52964	-3.20821	0.00161461	-3.1776
FXYD4	1.08608	1.62489	3.2069	0.00162151	-3.18156
ALDH3A1	1.40733	2.41699	3.19979	0.00165956	-3.20308
BIRC5	-0.661618	2.33651	-3.19856	0.00166623	-3.20681
GALNT6	-0.788953	2.66177	-3.19843	0.00166693	-3.2072
NRGN	-0.943987	4.46475	-3.19547	0.00168308	-3.21614
SPNS2	-0.621997	2.71662	-3.18348	0.00174992	-3.25227
CCL5	-0.684091	4.36002	-3.18284	0.0017536	-3.25421
BAMBI	-0.862205	2.64712	-3.18075	0.00176552	-3.2605
COL6A3	-0.659024	4.5737	-3.1804	0.0017675	-3.26153
C12orf75	-0.618315	2.07773	-3.17945	0.00177294	-3.26438
FURIN	0.617329	6.10892	3.17758	0.00178373	-3.27001
GPRIN2	-0.642939	2.39032	-3.17721	0.00178589	-3.27113
FBXO2	0.771403	2.67218	3.17461	0.001801	-3.27894
GADD45G	0.614325	4.21941	3.17417	0.00180354	-3.28025
HLA-DPA1	-0.811496	6.34053	-3.16098	0.00188211	-3.31977
COL1A2	-0.741233	6.52176	-3.15769	0.00190226	-3.32963
AKR1C3	1.1831	4.12901	3.15571	0.00191442	-3.33553
LY86	-0.636235	3.04743	-3.15564	0.00191487	-3.33575
SLAMF7	-0.613569	2.72219	-3.15067	0.00194574	-3.35056
CRLF1	1.61716	4.5773	3.14741	0.00196629	-3.36029
C2CD4A	-0.710095	1.61795	-3.14462	0.00198401	-3.3686
AC104031.1	0.692119	1.26533	3.14414	0.00198707	-3.37002
CD8A	-0.592143	2.19857	-3.14223	0.00199931	-3.37571
KCNK5	-0.612772	4.15886	-3.13797	0.00202687	-3.38838
TRBC1	-0.665144	3.90983	-3.13794	0.00202704	-3.38846
S100P	1.91558	6.89063	3.13044	0.00207645	-3.41074
SPON2	-0.617391	2.58229	-3.12465	0.00211532	-3.4279
RASGRF1	-0.660404	1.31874	-3.11641	0.00217175	-3.45225
COL5A2	-0.653704	3.87929	-3.11485	0.00218263	-3.45687
MYO16-AS1	0.638667	0.85986	3.11127	0.00220772	-3.46743
TSKU	0.596438	3.55019	3.1005	0.00228481	-3.49915
IGHD3-3	-0.7051	1.30399	-3.10043	0.00228531	-3.49935
ADRA2A	-0.808285	2.14912	-3.09744	0.00230712	-3.50813
CLU	0.997735	6.00087	3.09689	0.00231116	-3.50974
TFPI2	-1.50226	3.26465	-3.09474	0.00232703	-3.51607
MAOA	0.595377	5.27209	3.08564	0.00239519	-3.54273
GLS	-0.630522	3.74917	-3.08064	0.00243348	-3.55737
CABYR	0.76354	1.33603	3.07826	0.0024519	-3.56433
TNFSF10	-0.649781	4.92838	-3.07667	0.00246424	-3.56896
GPR183	-0.647734	3.39766	-3.07084	0.0025101	-3.58597
CTHRC1	-0.794076	4.06301	-3.05809	0.00261313	-3.62308
ATP13A4-AS1	-0.784256	1.32639	-3.03707	0.00279151	-3.68394
ADAMDEC1	-0.595418	1.53796	-3.03584	0.00280233	-3.6875
COL12A1	-0.614851	2.23435	-3.03514	0.00280841	-3.6895
TSPYL5	-0.648789	2.55748	-3.03418	0.00281694	-3.69229
FUT6	-0.589531	0.902087	-3.02697	0.00288116	-3.71305
TMSB4XP8	-0.753528	4.93232	-3.02632	0.00288705	-3.71493
SLC13A2	-0.785352	0.748113	-3.02576	0.00289211	-3.71654
APBA2	-0.626723	1.66702	-3.01622	0.00297948	-3.74394
CX3CL1	-0.705406	3.60576	-3.01368	0.00300321	-3.75123
MMP9	-0.808978	3.54951	-3.00722	0.00306423	-3.76974
PIGR	-1.34981	6.93269	-3.00487	0.00308673	-3.77647
IFI27	-0.830574	5.31478	-3.00478	0.00308759	-3.77672
CYP27A1	-0.647346	4.53949	-2.99202	0.00321232	-3.81314
C15orf48	-0.727638	2.37807	-2.98789	0.00325362	-3.82488
CYS1	-0.590762	1.35567	-2.9869	0.00326359	-3.82769
ALDH3B1	0.600219	4.5436	2.98184	0.00331513	-3.84208
CCL19	-0.906495	4.21052	-2.96425	0.00349994	-3.89189
HLA-DOA	-0.764316	3.92771	-2.95175	0.00363702	-3.92715
LYZ	-1.03347	6.74343	-2.94818	0.00367704	-3.93718
MYRF	-0.608978	1.63993	-2.94564	0.00370579	-3.94433
ISG15	-0.772777	5.71472	-2.93557	0.00382172	-3.97256
MARCO	-1.01485	4.22871	-2.93301	0.00385177	-3.97974
GALNT3	-0.620766	3.35543	-2.92333	0.00396717	-4.00678
TSPAN7	0.790049	2.9449	2.91784	0.00403394	-4.02207
HLA-DRA	-0.723046	9.99629	-2.89926	0.00426805	-4.07369
FOXA2	0.722877	3.80735	2.89592	0.00431129	-4.08291
COL3A1	-0.765973	7.17432	-2.88722	0.00442619	-4.10696
ACY3	-0.585521	1.67979	-2.87695	0.00456533	-4.13524
SHISA2	-0.824725	2.04225	-2.87555	0.00458465	-4.1391
NMNAT2	-0.669549	1.1444	-2.87057	0.00465379	-4.15277
RNU6-418P	-0.604587	1.65417	-2.86221	0.00477213	-4.1757
CEACAM5	-1.47316	5.53541	-2.85835	0.00482753	-4.18623
HMGB3	0.768745	5.96376	2.85597	0.00486219	-4.19276
EFS	-0.58521	2.18331	-2.84132	0.0050797	-4.23268
SERPINF2	0.656419	3.51194	2.8327	0.00521179	-4.25608
MIR4539	-0.662379	1.44623	-2.82677	0.00530451	-4.27214
TENM1	0.617223	0.787418	2.8231	0.00536275	-4.28209
TOX3	-0.609511	2.23602	-2.82186	0.00538245	-4.28543
ALOX15B	0.874419	4.68046	2.82008	0.00541101	-4.29025
STMN3	-0.606382	3.08617	-2.81786	0.00544669	-4.29624
ZG16B	-0.585847	1.0875	-2.80785	0.00561044	-4.3232
TRBJ1-5	-0.613284	1.60715	-2.80471	0.00566283	-4.33165
ACHE	-0.751717	2.0972	-2.8021	0.0057067	-4.33868
LINC00261	0.683078	2.16167	2.79643	0.00580285	-4.35387
CAPN9	0.736119	2.13371	2.78919	0.00592796	-4.37326
ATOH8	0.585182	2.72489	2.78495	0.00600221	-4.38458
ALDH1A1	-0.739787	4.66554	-2.78302	0.00603637	-4.38973
IER3	-0.622023	4.27159	-2.76744	0.0063184	-4.43121
LTB	-0.624569	3.50549	-2.75847	0.00648623	-4.455
TPSAB1	-0.710657	3.19054	-2.74757	0.00669539	-4.48378
OTULINL	0.627835	3.03564	2.73808	0.00688263	-4.50878
SORCS2	0.591025	2.58364	2.73353	0.0069741	-4.52075
HK2	-0.592762	3.35084	-2.73213	0.00700251	-4.52443
COL5A1	-0.59488	4.1001	-2.72987	0.00704845	-4.53035
MRC1	-0.761776	3.84901	-2.71789	0.00729668	-4.56169
LINC00342	-0.682743	1.93084	-2.70405	0.00759363	-4.59777
HTRA3	-0.618893	3.69728	-2.69826	0.00772084	-4.61279
EGLN3	-0.651356	2.03311	-2.69483	0.00779725	-4.62169
STEAP1	-0.596714	2.6709	-2.69319	0.00783402	-4.62594
POSTN	-0.642388	4.58361	-2.6828	0.0080706	-4.65282
SOX2	-0.764185	2.00271	-2.67448	0.00826459	-4.67426
AL353586.1	0.76047	0.648033	2.67414	0.00827253	-4.67513
HLA-DPB1	-0.654301	5.96958	-2.66225	0.00855734	-4.70566
TAC4	-0.617929	1.06821	-2.65775	0.00866744	-4.71719
LPL	0.777478	4.05673	2.65386	0.00876352	-4.72712
EGR1	-0.677377	6.10187	-2.65054	0.00884644	-4.73561
CES1	0.995683	4.36496	2.64599	0.00896116	-4.74722
GPX2	1.47079	3.58292	2.63711	0.00918898	-4.76983
IGFBP2	0.904264	4.98013	2.63045	0.00936308	-4.78672
SFRP2	-0.978984	4.58749	-2.62821	0.00942223	-4.79238
COL25A1	0.737016	1.20724	2.62707	0.00945247	-4.79527
CD24	-0.692421	5.95414	-2.62527	0.00950049	-4.79983
IGKV2D-29	-1.00339	3.53036	-2.60848	0.00995905	-4.8422
AC025580.1	-0.786151	2.14757	-2.60787	0.00997585	-4.84372
U8	0.635252	0.616893	2.59458	0.0103535	-4.87708
CDH3	-0.695871	3.06361	-2.59177	0.0104347	-4.8841
AC092071.1	0.618173	1.88421	2.57915	0.0108075	-4.91558
IRX6	-0.630179	1.31721	-2.57881	0.0108177	-4.91643
MIR3189	-0.767537	2.32976	-2.57852	0.0108265	-4.91716
SERPINA1	0.854028	7.44904	2.57739	0.0108604	-4.91996
IGHG4	-0.993986	5.56185	-2.57008	0.0110829	-4.93814
AOC1	0.958926	3.02925	2.54294	0.0119446	-5.00516
SCNN1G	0.590832	2.65294	2.53233	0.0122973	-5.03117
PLAU	-0.607915	4.06017	-2.52934	0.0123983	-5.03848
IGHV3-30	-0.907611	5.76711	-2.51013	0.0130659	-5.0853
PEBP4	0.989947	4.28062	2.50533	0.0132374	-5.09693
MCEMP1	-0.69499	1.92755	-2.5007	0.0134049	-5.10814
SLC7A2	0.8927	3.67866	2.49095	0.0137639	-5.13169
INHA	0.903092	1.50058	2.48699	0.0139122	-5.14123
PEG10	-0.840029	2.60813	-2.48278	0.0140713	-5.15136
NR0B2	-0.699185	1.9735	-2.46739	0.014667	-5.18824
TNNC2	-0.791019	1.89782	-2.46738	0.0146673	-5.18826
IGHM	-1.0141	7.76617	-2.46538	0.0147466	-5.19306
TPPP3	-0.711624	3.90431	-2.46067	0.014934	-5.20428
COL1A1	-0.701771	7.11414	-2.46034	0.0149473	-5.20507
BRDT	0.629633	0.846491	2.45957	0.0149784	-5.20692
CPA3	-0.701205	3.59186	-2.43841	0.0158497	-5.25712
GJB2	-0.638351	2.35245	-2.42913	0.016246	-5.27901
VIL1	-0.747304	1.15971	-2.42235	0.0165413	-5.29498
RND1	0.703958	3.53777	2.41582	0.01683	-5.3103
PPP1R14D	-0.901815	2.76228	-2.40335	0.0173935	-5.33944
CST6	-0.721545	2.93425	-2.3982	0.0176309	-5.35143
IGHGP	-0.973325	6.67763	-2.38692	0.0181614	-5.37763
IGHG3	-0.895161	6.91427	-2.37674	0.0186524	-5.40118
SLC7A11	0.604129	1.84744	2.37253	0.0188589	-5.41089
IGLV7-43	-0.804286	3.92346	-2.34962	0.0200177	-5.46344
IGKV1-9	-0.881243	5.55835	-2.34762	0.0201215	-5.468
IGHV3-69-1	-0.600185	2.13501	-2.3347	0.0208056	-5.49741
IGHG2	-0.875543	7.02741	-2.33314	0.0208894	-5.50094
BARX1	1.09344	2.15994	2.32674	0.021237	-5.51544
FABP4	-0.624397	1.78966	-2.32577	0.0212903	-5.51765
AC079384.1	0.594802	1.20888	2.3238	0.0213982	-5.52209
UCHL1	0.975887	3.09413	2.31665	0.0217953	-5.53823
CSF3R	-0.648924	3.11529	-2.30914	0.0222192	-5.55513
LIF	-0.636177	3.09062	-2.30873	0.0222425	-5.55605
TPSB2	-0.656959	3.22908	-2.30361	0.0225359	-5.56754
MFSD4A	-0.627669	2.56402	-2.29862	0.0228252	-5.57872
IRX2	-0.699927	3.48327	-2.29793	0.0228652	-5.58026
IGHV2-5	-0.928091	5.74929	-2.28202	0.0238101	-5.61571
SCEL	0.604962	3.64468	2.28187	0.0238195	-5.61606
AQP3	0.590486	7.86623	2.28155	0.0238391	-5.61678
HLA-DRB1	-0.605276	9.28087	-2.28109	0.0238666	-5.61779
IGKJ5	-0.732753	3.04954	-2.27984	0.0239428	-5.62057
IGHV3-33	-0.875395	5.00935	-2.27441	0.0242743	-5.6326
TFPI	-0.601303	3.76921	-2.26419	0.0249102	-5.6552
IGHV3-7	-0.809877	6.0033	-2.26129	0.0250934	-5.6616
FAM3B	0.607935	2.96266	2.25836	0.0252795	-5.66805
IGLV3-9	-0.815669	3.91596	-2.25663	0.0253897	-5.67185
IGHV3-72	-0.710711	3.43345	-2.24971	0.0258355	-5.68703
IGHJ3P	-0.764649	3.16908	-2.24478	0.0261574	-5.69783
KRT6A	0.826647	1.54436	2.23626	0.0267219	-5.71644
IGKV1-39	-0.680806	2.7264	-2.22773	0.0272977	-5.735
IGHV3-23	-0.79048	6.92777	-2.22679	0.0273623	-5.73706
IGHJ4	-0.808959	3.96894	-2.20575	0.0288319	-5.78253
IGHV3-66	-0.680944	2.92039	-2.20548	0.0288508	-5.78311
IGKV1-17	-0.806586	4.97458	-2.20447	0.0289235	-5.78529
FOXJ1	-0.667816	3.43571	-2.20182	0.0291142	-5.791
IGHV4-34	-0.848871	5.62621	-2.2003	0.029224	-5.79426
SFTPA1	-0.975986	9.74789	-2.19784	0.0294022	-5.79954
LGSN	0.619201	1.98069	2.19598	0.0295372	-5.80351
CCL18	-0.714062	5.68346	-2.18628	0.0302529	-5.82427
IGHJ5	-0.709766	2.82093	-2.17599	0.0310276	-5.84617
TCIM	0.601139	7.6899	2.17542	0.0310713	-5.84739
IGHV3-74	-0.744686	5.05717	-2.17063	0.0314382	-5.85755
IGHV3-15	-0.749681	5.95089	-2.15425	0.0327221	-5.89216
CLDN2	-0.934926	2.70403	-2.14745	0.0332679	-5.90644
IGHV3-13	-0.762536	3.24683	-2.13418	0.0343564	-5.93421
IGKV1-5	-0.788127	7.19803	-2.12938	0.0347582	-5.94423
PCP4	-0.908127	2.37586	-2.12746	0.0349194	-5.94821
IGHV3-49	-0.77632	4.78095	-2.12298	0.0352991	-5.95752
IGHJ3	-0.749815	4.34924	-2.10888	0.0365173	-5.9867
HLA-DQB1	-0.59392	5.44122	-2.08957	0.0382435	-6.02636
TUBB2B	-0.637766	1.43646	-2.08468	0.0386924	-6.03636
C4BPA	-0.743865	6.37057	-2.07938	0.0391829	-6.04715
DMBT1	-0.892792	3.7646	-2.07222	0.0398543	-6.0617
C5	-0.592639	2.65261	-2.06299	0.0407353	-6.0804
AGR2	0.606281	7.41317	2.06169	0.0408599	-6.08301
AC107385.2	-0.638686	1.51174	-2.05838	0.0411807	-6.0897
FABP3	-0.592596	3.03419	-2.05694	0.0413208	-6.0926
IGHV7-4-1	-0.740755	1.95618	-2.04871	0.04213	-6.10916
SYT7	0.58699	3.22874	2.04593	0.0424059	-6.11473
LRRN4	-0.619019	2.66368	-2.04182	0.0428174	-6.12296
SLC1A7	-0.734689	1.75097	-2.031	0.0439164	-6.14456
SHISA3	-0.787555	1.87405	-2.02929	0.044092	-6.14796
IGHV2-26	-0.732971	3.82428	-2.02786	0.0442392	-6.1508
IGHV3-53	-0.657916	3.47243	-2.02471	0.0445661	-6.15706
IGKJ3	-0.597617	2.37505	-2.01683	0.0453909	-6.17266
IGHG1	-0.819508	9.44955	-1.99951	0.0472511	-6.20677
CLDN18	-0.872258	3.28783	-1.99938	0.0472658	-6.20703
IGHV4-39	-0.792732	6.35758	-1.99586	0.0476513	-6.21392
IGHV6-1	-0.708178	4.31313	-1.9947	0.04778	-6.21621
IGKV1D-39	-0.624944	2.97237	-1.99279	0.0479903	-6.21993
B3GNT6	0.686049	2.19873	1.99071	0.0482216	-6.22401
IGKV1D-16	-0.613255	2.49405	-1.98839	0.0484795	-6.22852
IGKV4-1	-0.787806	7.46629	-1.98536	0.048819	-6.23443
IGHV1-18	-0.752607	6.37523	-1.98129	0.0492779	-6.24236

## Sheet: C1 vs C3
	logFC	AveExpr	T	P.Value	B
GKN2	3.87696	1.20619	16.5275	2.1e-47	96.9819
PCSK2	3.432	0.613826	14.6021	3.43e-39	78.2807
POLR3H	1.29223	1.99534	14.259	9.31e-38	75.0174
CACNA2D2	2.89159	1.92845	13.526	9.82e-35	68.1354
AC023421.1	2.85829	0.563315	13.5019	1.23e-34	67.9117
PLA2G10	2.88454	1.90945	12.7114	1.91e-31	60.6529
PGC	6.25458	3.73717	12.683	2.48e-31	60.3948
RHOBTB2	2.14471	3.26809	12.3496	5.17e-30	57.3925
SLC14A2	1.87578	0.397772	11.9064	2.78e-28	53.4579
SLC26A9	2.99633	2.17868	11.5638	5.76e-27	50.4638
KLF15	1.72549	1.43609	11.3302	4.44e-26	48.4478
AC114810.1	0.759267	0.636321	11.2266	1.09e-25	47.5608
PRMT8	0.707228	0.234138	11.1924	1.47e-25	47.2689
CBR1	2.34243	4.81974	11.1288	2.54e-25	46.7275
SFTPB	4.96804	8.80891	11.0962	3.36e-25	46.4503
DSCAM-AS1	2.98406	0.71318	11.0483	5.07e-25	46.044
RNF145	1.48445	5.27846	11.0301	5.93e-25	45.8904
PMM1	1.28968	2.54648	10.9664	1.02e-24	45.3514
ADGRD1	1.57162	1.29402	10.8556	2.63e-24	44.4198
SLC46A2	1.47807	0.866547	10.8333	3.18e-24	44.2327
SYBU	1.90952	1.77564	10.7869	4.72e-24	43.844
AGA	1.20676	3.77472	10.6164	1.99e-23	42.4252
MARCKS	-1.37428	5.39013	-10.5686	2.97e-23	42.0291
PEBP4	2.95493	2.34838	10.5182	4.53e-23	41.6135
C16orf89	3.99313	4.85083	10.3848	1.38e-22	40.5174
MCM6	-1.26358	3.97388	-10.3538	1.78e-22	40.2644
CDH15	1.2102	0.736654	10.3342	2.09e-22	40.1046
AL445253.1	0.872974	0.493682	10.2788	3.31e-22	39.6533
AL353586.1	1.15337	0.193565	10.2731	3.47e-22	39.607
SFTA1P	2.30215	1.92285	10.2356	4.72e-22	39.3022
MMD	-1.47948	3.45053	-10.1944	6.63e-22	38.9681
GREB1	1.06083	0.670506	10.1465	9.82e-22	38.5809
SLC22A31	3.19355	4.15849	10.0305	2.53e-21	37.6483
SELENBP1	2.31283	5.03525	10.0233	2.68e-21	37.59
AL136452.1	0.93735	0.531269	10.0186	2.79e-21	37.5524
AC129507.2	1.14614	0.750709	10.0087	3.02e-21	37.4734
ANLN	-1.85596	3.09786	-9.90296	7.11e-21	36.6297
EPHX1	2.14045	6.52326	9.88014	8.55e-21	36.4483
TOP2A	-1.96228	4.28605	-9.87042	9.25e-21	36.3711
AFF3	0.765965	0.440207	9.8563	1.04e-20	36.2591
FAM83D	-1.59007	2.78763	-9.80388	1.58e-20	35.8441
RPH3AL	1.22319	2.18934	9.73707	2.7e-20	35.317
RBL1	-0.924435	1.89	-9.68189	4.19e-20	34.8834
MTARC1	1.19231	1.14772	9.62384	6.64e-20	34.429
ATOH8	1.83943	1.4972	9.52506	1.45e-19	33.6597
TPX2	-1.99587	3.96821	-9.49443	1.85e-19	33.4221
PLD3	1.49046	6.24479	9.43656	2.91e-19	32.9747
CDK1	-1.61026	3.29181	-9.43503	2.94e-19	32.9629
TSPAN11	1.84867	1.53423	9.41289	3.5e-19	32.7922
SCGB3A2	4.67956	5.19299	9.40255	3.8e-19	32.7125
RRM2	-1.55799	2.81164	-9.39209	4.12e-19	32.632
MELK	-1.64094	2.61315	-9.38121	4.49e-19	32.5484
LINC02122	1.05309	0.462273	9.37585	4.68e-19	32.5071
ODC1	2.187	5.67644	9.36767	4.99e-19	32.4443
CCNA2	-1.6013	2.92224	-9.34572	5.92e-19	32.2758
CORO1C	-0.988549	4.59822	-9.34517	5.94e-19	32.2716
STIL	-0.984222	1.62768	-9.32873	6.76e-19	32.1456
NPAS3	0.973612	0.310946	9.30639	8.04e-19	31.9746
COLGALT1	-1.01451	4.81947	-9.30133	8.36e-19	31.9359
AC236972.3	0.859334	0.375663	9.28314	9.63e-19	31.797
KIF2C	-1.6319	2.78058	-9.27482	1.03e-18	31.7335
AC129507.3	0.756665	0.520663	9.24889	1.26e-18	31.5357
MYBL2	-2.25081	4.05949	-9.24348	1.31e-18	31.4945
CIP2A	-1.19365	1.72901	-9.22976	1.46e-18	31.3902
ABHD14A	0.892317	1.68306	9.21734	1.6e-18	31.2957
ASF1B	-1.425	3.44705	-9.2154	1.63e-18	31.2809
TMEM59L	2.76251	1.69593	9.2002	1.83e-18	31.1655
ST6GALNAC4	1.35058	3.73325	9.19726	1.87e-18	31.1432
NEDD4L	1.06497	1.96718	9.19446	1.91e-18	31.122
BUB1	-1.38852	2.33776	-9.18263	2.09e-18	31.0322
FOLR1	3.26576	5.17467	9.16577	2.38e-18	30.9045
CGAS	-0.997715	2.17761	-9.16067	2.48e-18	30.8658
GPRC5C	1.83942	3.28301	9.13913	2.93e-18	30.7029
ORM1	2.61554	2.10167	9.12601	3.24e-18	30.6038
WNT4	1.27198	0.996612	9.11741	3.46e-18	30.5389
AC084375.1	1.44556	0.844841	9.10815	3.71e-18	30.4691
AK1	1.14415	2.00184	9.06813	5.04e-18	30.1677
ALDH3A2	1.44155	3.42949	9.06439	5.19e-18	30.1396
SPATS2L	-1.09557	3.41211	-9.04885	5.84e-18	30.0228
CEP55	-1.55417	3.02012	-9.04042	6.23e-18	29.9596
ASAH1	1.11561	4.50777	9.02973	6.76e-18	29.8793
RFTN1	1.28393	3.47958	9.02889	6.81e-18	29.8731
PBXIP1	1.26623	5.75392	9.02873	6.81e-18	29.8719
KIF4A	-1.4996	2.42284	-9.0113	7.78e-18	29.7413
KIF23	-1.23626	1.98015	-9.00073	8.43e-18	29.6622
IRX3	1.96669	3.52721	8.97862	9.98e-18	29.4969
DLGAP5	-1.51642	2.51139	-8.95799	1.17e-17	29.3429
CDC6	-1.40012	2.39019	-8.95739	1.17e-17	29.3385
CDCA8	-1.50194	3.20878	-8.95409	1.2e-17	29.3139
CCNB2	-1.44985	3.06332	-8.94879	1.25e-17	29.2744
DTL	-1.14366	2.20359	-8.93094	1.43e-17	29.1414
CHIA	1.51678	0.790765	8.91719	1.59e-17	29.0391
UBE2C	-2.22784	4.6655	-8.91413	1.63e-17	29.0164
CKAP2L	-1.10091	1.55087	-8.89921	1.82e-17	28.9055
ORM2	2.37624	1.71394	8.89584	1.87e-17	28.8805
CDCA5	-1.55019	2.76347	-8.89159	1.93e-17	28.849
TRIP13	-1.62797	2.91239	-8.89134	1.93e-17	28.8471
COL25A1	1.45911	0.451989	8.88891	1.97e-17	28.829
KCNE4	1.80276	1.92744	8.88603	2.01e-17	28.8077
BIRC5	-1.78176	3.44976	-8.85992	2.45e-17	28.6142
SHCBP1	-0.979239	1.62388	-8.83429	2.97e-17	28.4247
CTHRC1	-1.98289	5.25564	-8.80753	3.63e-17	28.2272
MAOA	1.89784	3.9987	8.79993	3.84e-17	28.1711
AATK	0.970989	1.00057	8.79536	3.98e-17	28.1375
DUOX1	1.6326	1.85078	8.7868	4.24e-17	28.0745
HOPX	2.57815	4.44287	8.77645	4.58e-17	27.9983
PRR11	-1.25908	2.1179	-8.77589	4.6e-17	27.9941
CYP2B7P	2.9978	3.6534	8.76429	5.02e-17	27.9088
PLSCR1	-1.10768	4.31775	-8.7631	5.06e-17	27.9001
KIF11	-1.28944	2.65087	-8.76188	5.11e-17	27.8911
CHEK1	-1.21379	2.12317	-8.75674	5.31e-17	27.8534
GTSE1	-1.21728	1.92596	-8.74451	5.82e-17	27.7636
GALNTL6	0.666943	0.218879	8.73765	6.12e-17	27.7133
TNS2	1.1228	3.11143	8.72676	6.64e-17	27.6335
RAD51	-1.01924	1.77381	-8.71475	7.26e-17	27.5455
CENPA	-1.42728	2.10123	-8.70608	7.75e-17	27.4821
SMPDL3B	1.56409	3.66834	8.70139	8.02e-17	27.4478
RBPMS-AS1	1.07392	1.13824	8.68914	8.79e-17	27.3582
BRCA1	-0.970776	1.61791	-8.65695	1.12e-16	27.1234
EPSTI1	-1.32487	2.78638	-8.64563	1.21e-16	27.0409
DUOXA1	1.41599	1.5339	8.64542	1.22e-16	27.0394
RAD51AP1	-1.291	2.32317	-8.62782	1.38e-16	26.9114
ABCC6	1.13763	1.67108	8.59849	1.72e-16	26.6984
CDKN3	-1.48368	2.55826	-8.57362	2.07e-16	26.5182
FAM111B	-1.26062	2.11057	-8.56956	2.13e-16	26.4888
WDHD1	-1.01854	1.93412	-8.56144	2.26e-16	26.4301
HJURP	-1.46122	2.36173	-8.54087	2.63e-16	26.2815
SCNN1B	2.18281	3.23111	8.54056	2.63e-16	26.2793
TCF19	-1.14602	3.08566	-8.52805	2.89e-16	26.189
TMEM91	0.94613	1.55525	8.5228	3e-16	26.1512
RACGAP1	-1.26053	3.2147	-8.51403	3.2e-16	26.088
NCAPH	-1.14472	1.78958	-8.51291	3.23e-16	26.0799
GNA13	-0.838196	4.05082	-8.49753	3.61e-16	25.9692
AC079384.1	1.27567	0.508875	8.46529	4.57e-16	25.7376
GBP1	-1.7324	4.04649	-8.46485	4.59e-16	25.7344
CIT	1.4802	1.80014	8.46391	4.62e-16	25.7277
MYO16-AS1	1.02338	0.427692	8.46019	4.75e-16	25.701
GNMT	0.694086	0.644984	8.44373	5.35e-16	25.5831
PLK4	-0.982189	1.6898	-8.43436	5.73e-16	25.516
PARM1	1.97211	4.63846	8.40385	7.16e-16	25.298
MKI67	-1.50585	2.77689	-8.39642	7.55e-16	25.2449
FRAT1	0.828146	1.77796	8.38243	8.36e-16	25.1452
DCLRE1B	-0.654363	2.18374	-8.3511	1.05e-15	24.9223
GAS2L3	-0.790856	1.27554	-8.35064	1.05e-15	24.919
KPNA2	-1.27412	4.03976	-8.33765	1.16e-15	24.8268
NCAPG	-1.274	1.94232	-8.33605	1.17e-15	24.8154
CALU	-0.977946	5.71897	-8.31316	1.38e-15	24.6531
ALDH6A1	0.972798	2.61225	8.30858	1.43e-15	24.6207
IDUA	1.12288	2.29643	8.30278	1.49e-15	24.5796
CDC45	-1.30742	2.18989	-8.29455	1.58e-15	24.5214
DSCC1	-1.13199	2.07102	-8.29419	1.58e-15	24.5188
SKA3	-1.10281	1.80655	-8.28926	1.64e-15	24.484
KIF15	-0.965214	1.44543	-8.28652	1.67e-15	24.4646
SIL1	0.923897	3.76973	8.28367	1.71e-15	24.4445
STAT1	-1.3014	5.3747	-8.27099	1.87e-15	24.355
CENPW	-1.44185	3.19912	-8.262	1.99e-15	24.2916
GLTPD2	1.2924	0.883325	8.256	2.08e-15	24.2492
TTK	-1.20427	1.78857	-8.25547	2.09e-15	24.2455
C1GALT1	-1.06593	3.12235	-8.23059	2.5e-15	24.0703
CENPU	-1.17591	2.57622	-8.22102	2.68e-15	24.0031
MAD2L1	-1.23809	2.23095	-8.21961	2.7e-15	23.9932
NMD3	-0.801259	3.81881	-8.20925	2.91e-15	23.9204
DDIAS	-0.876412	1.23986	-8.19518	3.22e-15	23.8217
LPL	2.03838	2.79963	8.17586	3.7e-15	23.6864
CDR2	-0.782826	3.44704	-8.16277	4.06e-15	23.5948
SORCS2	1.55072	1.62692	8.15743	4.21e-15	23.5575
NDC80	-1.26007	2.16416	-8.15181	4.39e-15	23.5182
TMEM163	1.55028	2.10103	8.14702	4.54e-15	23.4848
LRPAP1	0.86235	3.77208	8.14648	4.56e-15	23.481
PLK1	-1.26072	2.44581	-8.14433	4.63e-15	23.466
ACADSB	1.09292	2.65485	8.1293	5.15e-15	23.3612
CXCL10	-2.35716	4.55261	-8.11964	5.51e-15	23.2938
UHRF1	-1.14769	2.05858	-8.11382	5.75e-15	23.2533
ATAD2	-1.18273	3.02355	-8.08449	7.07e-15	23.0494
PPP1R18	-1.17017	4.22998	-8.08087	7.26e-15	23.0243
CCDC90B	-0.770939	2.54112	-8.07695	7.46e-15	22.9971
FIGNL1	-0.946822	2.30882	-8.0732	7.66e-15	22.9711
C5orf34	-0.746473	1.15727	-8.06821	7.94e-15	22.9365
DSN1	-0.900603	3.38184	-8.06518	8.11e-15	22.9155
CENPI	-0.875169	1.27978	-8.06072	8.37e-15	22.8845
CDC20	-1.75358	4.08392	-8.05929	8.45e-15	22.8747
ASAP1	-0.967049	2.96905	-8.05442	8.75e-15	22.8409
NEK2	-1.40883	2.59901	-8.05347	8.81e-15	22.8344
ACTN1	-1.06385	4.41495	-8.02541	1.07e-14	22.6403
LINC02478	1.28112	1.50079	7.98862	1.39e-14	22.3867
RAD54L	-0.855074	1.14894	-7.98609	1.42e-14	22.3693
KLHL5	-1.1084	3.23403	-7.98516	1.42e-14	22.3629
CENPK	-0.939069	1.49766	-7.98218	1.45e-14	22.3424
DEPDC1B	-1.10533	1.62075	-7.96804	1.61e-14	22.2452
TMEM9	1.06836	5.14717	7.96026	1.7e-14	22.1917
AC092071.1	1.50449	0.991885	7.9591	1.71e-14	22.1838
AC137932.1	1.03002	1.20367	7.95569	1.75e-14	22.1604
HENMT1	-1.22027	2.30138	-7.93405	2.04e-14	22.012
DCXR	1.24492	4.68856	7.92468	2.17e-14	21.9479
HAPLN3	-1.18968	2.68248	-7.91547	2.32e-14	21.8849
ZNF710	1.12323	3.03841	7.89924	2.6e-14	21.774
FANCI	-0.874244	1.75827	-7.88868	2.79e-14	21.702
B3GNT8	1.50604	2.23768	7.88302	2.91e-14	21.6634
BRIP1	-0.671984	0.944648	-7.88139	2.94e-14	21.6523
BUB1B	-1.14506	1.94729	-7.88134	2.94e-14	21.6519
DBF4	-0.86157	2.16593	-7.87305	3.12e-14	21.5955
PAK3	0.731593	0.380656	7.87078	3.17e-14	21.58
MCUB	-0.992452	2.76222	-7.864	3.32e-14	21.5339
PIP4K2A	-0.934352	3.55127	-7.86071	3.39e-14	21.5115
CYP4B1	2.69333	3.10168	7.85708	3.48e-14	21.4868
EME1	-0.71873	1.04253	-7.83464	4.07e-14	21.3344
SGO1	-0.735136	1.00601	-7.83166	4.15e-14	21.3142
C18orf54	-0.598567	0.891707	-7.83122	4.16e-14	21.3111
SPHK1	-1.24244	2.19287	-7.82408	4.38e-14	21.2627
SEPTIN11	-1.0393	3.73943	-7.8114	4.78e-14	21.1769
SULF1	-1.84707	4.09298	-7.80718	4.92e-14	21.1483
SMC2	-0.8902	2.48339	-7.80478	5e-14	21.132
PAX7	1.5895	0.526688	7.80153	5.11e-14	21.1101
WDR76	-0.863204	1.98656	-7.79966	5.18e-14	21.0974
KIFC1	-1.45494	3.16773	-7.79747	5.26e-14	21.0826
SLC2A1	-1.81059	4.61251	-7.79294	5.42e-14	21.052
ALDH2	1.18957	4.06291	7.78621	5.68e-14	21.0065
TMED6	0.96136	0.810266	7.78297	5.81e-14	20.9846
ZBTB16	1.31071	0.988739	7.76946	6.38e-14	20.8935
PDLIM5	-0.97552	3.40663	-7.76391	6.63e-14	20.8561
CLSPN	-0.84331	1.18601	-7.76374	6.63e-14	20.8549
MCM10	-1.03838	1.48566	-7.75745	6.93e-14	20.8125
EXO1	-1.10725	1.77556	-7.74883	7.35e-14	20.7545
TFRC	-1.38147	4.33521	-7.7456	7.51e-14	20.7328
TRIM59	-0.666285	1.30582	-7.73726	7.96e-14	20.6766
MCM4	-1.20983	3.85202	-7.73203	8.25e-14	20.6415
AURKB	-1.45231	2.76492	-7.72692	8.54e-14	20.6072
SPC24	-1.07572	2.0572	-7.72493	8.66e-14	20.5938
MMP14	-1.4381	6.16766	-7.72465	8.68e-14	20.5919
GNB4	-1.01648	2.32907	-7.7169	9.15e-14	20.5399
CENPM	-1.13727	2.54569	-7.7129	9.4e-14	20.5131
SUSD2	2.47201	3.57962	7.70736	9.77e-14	20.476
LINC02198	0.590252	0.536967	7.70558	9.89e-14	20.464
CLIC3	1.94676	3.53175	7.6906	1.1e-13	20.3637
DEPDC1	-1.04744	1.46073	-7.68748	1.12e-13	20.3428
TUBA1B	-1.04809	4.92853	-7.68265	1.16e-13	20.3105
CHEK2	-0.85622	2.11891	-7.67823	1.19e-13	20.281
NDC1	-0.849736	3.25542	-7.6768	1.2e-13	20.2714
SYNJ2	-0.726726	1.92546	-7.67491	1.22e-13	20.2588
KNL1	-0.787219	1.14534	-7.67216	1.24e-13	20.2404
ATP1B1	1.4683	7.28743	7.66756	1.28e-13	20.2096
IQGAP3	-1.22177	2.51232	-7.66404	1.31e-13	20.1861
SCNN1G	1.51558	1.72847	7.65842	1.36e-13	20.1487
PLIN5	0.713261	0.658646	7.65438	1.4e-13	20.1217
FBXO5	-0.811743	1.83506	-7.65437	1.4e-13	20.1216
STEAP1	-1.80491	3.85751	-7.65265	1.42e-13	20.1102
GINS3	-0.621798	1.33626	-7.63955	1.55e-13	20.0229
KIF18B	-1.24108	1.90793	-7.63883	1.56e-13	20.0181
ZNF367	-0.827007	1.53609	-7.63044	1.65e-13	19.9623
C2	1.36754	2.53581	7.62614	1.7e-13	19.9337
ATP13A3	-0.997011	3.47445	-7.6225	1.74e-13	19.9094
MTFR2	-0.88819	1.44688	-7.61777	1.8e-13	19.878
SHMT1	0.851922	2.43176	7.61356	1.85e-13	19.8501
CNTROB	0.746118	2.89075	7.61108	1.88e-13	19.8336
MCM2	-1.29015	2.79706	-7.5928	2.13e-13	19.7123
SGO2	-0.805805	1.524	-7.59008	2.17e-13	19.6943
SASS6	-0.708507	1.54692	-7.58952	2.18e-13	19.6906
EBPL	0.902027	4.19402	7.58897	2.19e-13	19.6869
ZBTB4	0.748125	4.13863	7.58881	2.19e-13	19.6859
LCN12	0.809361	0.696277	7.57514	2.4e-13	19.5953
RAP1GAP	1.90424	3.40889	7.5747	2.41e-13	19.5924
ORC1	-1.04501	1.80665	-7.56642	2.55e-13	19.5376
LMNB1	-1.14953	3.81671	-7.56332	2.6e-13	19.5172
RHEBL1	-0.785179	1.41834	-7.5601	2.66e-13	19.4959
PHF19	-0.796045	2.58337	-7.55238	2.8e-13	19.4449
DIAPH3	-0.739705	1.09596	-7.55054	2.83e-13	19.4328
PNMA2	1.44672	2.06969	7.54794	2.88e-13	19.4156
WFDC12	0.907745	0.265542	7.53405	3.17e-13	19.324
PDE4D	1.31347	1.90999	7.53136	3.22e-13	19.3063
NCAPG2	-0.990356	2.52727	-7.52486	3.37e-13	19.2634
ORC6	-0.881585	1.55544	-7.51541	3.59e-13	19.2013
AURKA	-1.32472	3.11634	-7.51211	3.67e-13	19.1796
VRK2	-0.649981	2.50849	-7.50873	3.75e-13	19.1574
RND3	-1.34557	3.41768	-7.5079	3.77e-13	19.1519
CENPE	-0.888691	1.2838	-7.50344	3.89e-13	19.1226
CRLF1	3.17492	2.94471	7.49486	4.12e-13	19.0663
ALOX15B	2.25711	3.29929	7.49248	4.19e-13	19.0506
FEN1	-1.0522	4.00964	-7.49208	4.2e-13	19.048
CCN4	-1.23886	2.34576	-7.48966	4.27e-13	19.0321
E2F8	-0.911805	1.59948	-7.48896	4.29e-13	19.0275
FXYD4	1.75401	0.877328	7.4865	4.36e-13	19.0114
CENPF	-1.31104	2.48684	-7.48496	4.4e-13	19.0013
E2F2	-0.813041	1.2616	-7.48473	4.41e-13	18.9998
ACTR3	-0.617563	4.70792	-7.48055	4.53e-13	18.9724
NUF2	-1.2713	2.25076	-7.47557	4.69e-13	18.9398
SPC25	-1.01301	1.91974	-7.4661	5e-13	18.8777
TUBB	-0.914679	7.43718	-7.46012	5.2e-13	18.8386
VAPA	0.674597	4.2108	7.44034	5.93e-13	18.7094
FOXM1	-1.42115	2.71116	-7.43844	6.01e-13	18.697
ZWINT	-1.25483	3.8402	-7.4355	6.13e-13	18.6778
ASPM	-1.103	1.67509	-7.43374	6.2e-13	18.6663
LIMS1	-0.675419	3.53979	-7.43218	6.26e-13	18.6561
OCA2	0.624661	0.295758	7.43203	6.27e-13	18.6552
CCNE1	-1.33669	2.14398	-7.43155	6.29e-13	18.652
BICD1	-0.651002	1.15884	-7.42766	6.46e-13	18.6267
CST3	1.22731	6.2936	7.42584	6.54e-13	18.6148
SEC23A	-0.931498	3.32811	-7.42577	6.54e-13	18.6144
GINS2	-1.1115	2.2452	-7.42457	6.59e-13	18.6065
CDC7	-0.947587	2.06612	-7.4195	6.82e-13	18.5735
CDCA3	-1.02646	1.69683	-7.4174	6.91e-13	18.5598
ADAM12	-1.35426	1.89106	-7.41529	7.01e-13	18.5461
ZWILCH	-0.672961	2.01014	-7.41428	7.06e-13	18.5395
MSRA	0.669872	1.85665	7.40905	7.31e-13	18.5055
SKA1	-1.03999	1.63417	-7.39984	7.77e-13	18.4455
GPX8	-1.13979	3.12488	-7.39403	8.07e-13	18.4078
BAIAP2-DT	1.15475	3.47201	7.39379	8.09e-13	18.4062
SLC25A4	0.770656	3.0832	7.3883	8.39e-13	18.3706
DLC1	1.27014	2.37063	7.38791	8.41e-13	18.368
TACC2	1.2848	2.56145	7.37988	8.87e-13	18.316
SERPINF2	1.52973	2.62698	7.37686	9.05e-13	18.2964
SLC7A8	1.40564	2.69242	7.37373	9.24e-13	18.276
BARD1	-0.718207	1.66381	-7.37252	9.31e-13	18.2682
MTHFD1L	-0.665024	3.09974	-7.37017	9.46e-13	18.253
GPR39	0.916403	1.88467	7.36763	9.62e-13	18.2365
TOPBP1	-0.832763	2.96384	-7.36131	1e-12	18.1956
RFC4	-1.03693	2.95151	-7.35411	1.05e-12	18.149
RORC	1.36611	2.9955	7.35391	1.05e-12	18.1477
KNTC1	-0.938431	1.98128	-7.35237	1.06e-12	18.1377
VCAN	-1.69248	3.83715	-7.3522	1.07e-12	18.1366
LINC00676	2.09335	0.619597	7.35139	1.07e-12	18.1314
AHCYL2	1.59608	3.9583	7.34953	1.08e-12	18.1193
KIF20A	-1.15387	2.62756	-7.34067	1.15e-12	18.0621
FANCD2	-0.640727	1.4891	-7.33435	1.2e-12	18.0212
AUNIP	-0.796136	1.18202	-7.33366	1.2e-12	18.0168
LIMD1	0.625339	1.76947	7.32824	1.25e-12	17.9818
PAK2	-0.660921	4.42987	-7.32682	1.26e-12	17.9727
CENPN	-0.730893	1.64953	-7.32572	1.27e-12	17.9656
HASPIN	-0.670045	1.00738	-7.32523	1.27e-12	17.9624
APOL6	-1.00987	3.6513	-7.32357	1.29e-12	17.9517
HSD17B4	0.649176	3.48066	7.31624	1.35e-12	17.9044
CLIC4	-0.978239	5.47597	-7.3155	1.36e-12	17.8997
KCNQ1	1.47032	2.6171	7.31168	1.39e-12	17.8751
PLA2G1B	1.81736	1.52496	7.30904	1.42e-12	17.858
CKAP2	-0.901602	2.87192	-7.30814	1.42e-12	17.8523
AC008972.1	0.707442	0.729487	7.30661	1.44e-12	17.8424
CDK2AP2	1.29288	5.45964	7.29416	1.56e-12	17.7623
TMPO	-0.901368	3.84846	-7.2878	1.63e-12	17.7215
PPAT	-0.779495	2.3332	-7.2854	1.65e-12	17.706
IRX5	1.52911	2.28563	7.27904	1.73e-12	17.6652
SCNN1A	1.58424	5.44608	7.26902	1.84e-12	17.6009
MCM5	-0.83146	3.26229	-7.26022	1.95e-12	17.5445
TMEM125	1.38818	4.99006	7.25792	1.98e-12	17.5298
RILP	0.889928	2.86976	7.24234	2.19e-12	17.4301
CCSAP	-0.631179	1.78672	-7.24209	2.2e-12	17.4285
INCENP	-0.935822	2.77214	-7.2307	2.37e-12	17.3557
CD109	-1.44611	2.22643	-7.2175	2.58e-12	17.2715
EZH2	-1.02696	2.5666	-7.2171	2.59e-12	17.2689
MXRA5	-1.60687	3.70638	-7.21097	2.69e-12	17.2298
SLC22A3	1.72709	2.72062	7.21063	2.7e-12	17.2277
OTULINL	1.24121	2.39388	7.20387	2.82e-12	17.1846
AC015818.3	0.66238	0.407398	7.20244	2.85e-12	17.1755
NUP205	-0.758168	3.48688	-7.20083	2.88e-12	17.1652
POC1A	-0.889169	2.44462	-7.20044	2.88e-12	17.1627
TICRR	-0.599799	0.784216	-7.18776	3.13e-12	17.0821
ERCC6L	-0.746413	1.16909	-7.18463	3.2e-12	17.0622
XRCC2	-0.841051	1.35901	-7.17721	3.35e-12	17.0151
SEMA3C	-1.41901	3.49848	-7.17469	3.41e-12	16.9991
FCGR3A	-1.5737	5.07491	-7.16904	3.54e-12	16.9632
NT5C3A	-0.723544	3.48879	-7.16652	3.6e-12	16.9472
DAPK2	0.726947	1.13455	7.1651	3.63e-12	16.9382
GINS1	-1.09442	2.27898	-7.15984	3.75e-12	16.9049
NRAS	-0.759044	4.44023	-7.15899	3.78e-12	16.8995
HELLS	-0.833168	1.44149	-7.15889	3.78e-12	16.8989
HMMR	-1.10906	2.17224	-7.15012	4e-12	16.8434
FAM220A	-0.658927	3.54181	-7.14992	4e-12	16.8421
TMEM140	-0.68118	3.39349	-7.14244	4.2e-12	16.7947
YEATS2	-0.760946	2.55714	-7.13816	4.32e-12	16.7677
BFAR	0.660129	4.46025	7.13319	4.46e-12	16.7362
EMC10	0.816522	3.58562	7.12988	4.56e-12	16.7153
CDT1	-1.24616	2.77967	-7.12797	4.62e-12	16.7032
SPAG5	-1.13985	2.61476	-7.12464	4.72e-12	16.6822
TCP11L1	-0.663132	1.65256	-7.12414	4.73e-12	16.6791
HPS3	-0.731902	2.80478	-7.12121	4.82e-12	16.6606
C4orf46	-0.723535	2.1683	-7.11705	4.95e-12	16.6343
MTPN	-0.684192	5.71912	-7.10915	5.21e-12	16.5845
PRDM16-DT	0.640888	0.442807	7.109	5.22e-12	16.5836
PIK3AP1	-1.16041	2.74883	-7.10711	5.28e-12	16.5717
PARPBP	-0.675652	1.04841	-7.10222	5.45e-12	16.5408
ZNF267	-0.694584	2.1917	-7.10198	5.46e-12	16.5393
CHAF1A	-0.760945	2.38208	-7.10068	5.5e-12	16.5312
VCAM1	-1.3579	2.86628	-7.09788	5.6e-12	16.5136
TENT5A	1.16675	3.18241	7.09391	5.75e-12	16.4886
PTTG1	-1.2549	3.65362	-7.08455	6.11e-12	16.4297
PARP12	-0.757698	3.65777	-7.07889	6.33e-12	16.3941
RAB40C	0.981206	3.68067	7.07748	6.39e-12	16.3853
IFIH1	-0.943777	3.12006	-7.06903	6.75e-12	16.3322
DCK	-0.774682	3.34039	-7.06844	6.77e-12	16.3285
PER1	1.27639	3.58129	7.06809	6.79e-12	16.3263
NAPSA	3.01508	6.297	7.06527	6.91e-12	16.3086
PGM2	-0.8217	3.18459	-7.06495	6.93e-12	16.3066
CDCA7	-1.2964	2.76542	-7.06342	6.99e-12	16.297
NBN	-0.760667	3.59165	-7.0611	7.1e-12	16.2825
SNHG8	0.730917	2.49761	7.05658	7.31e-12	16.2542
NCEH1	-1.03055	3.53655	-7.0482	7.71e-12	16.2016
LDHD	1.2837	2.08574	7.04002	8.13e-12	16.1505
LINC00261	1.49383	1.33118	7.03691	8.29e-12	16.131
HAUS6	-0.672053	1.88401	-7.0337	8.46e-12	16.111
SAMD9L	-1.27151	2.8821	-7.02734	8.81e-12	16.0712
ITGAV	-1.1042	4.72695	-7.01684	9.42e-12	16.0057
SLC20A1	-0.871415	4.05659	-7.01567	9.5e-12	15.9984
TRAIP	-0.657652	1.47534	-7.01493	9.54e-12	15.9938
OSBPL3	-0.911405	2.77239	-7.0131	9.65e-12	15.9824
SAMHD1	-0.978854	3.57037	-7.0104	9.82e-12	15.9655
TBC1D2	1.03811	3.6625	7.00473	1.02e-11	15.9302
GMPS	-0.696335	3.33383	-7.00397	1.02e-11	15.9254
AL049767.1	0.773555	0.358424	6.99881	1.06e-11	15.8933
ADI1	0.797126	4.36328	6.99319	1.1e-11	15.8583
ESPL1	-0.95479	1.46712	-6.99318	1.1e-11	15.8583
TSTD1	1.09843	4.60579	6.99281	1.1e-11	15.856
CXXC4	0.971246	1.03645	6.98875	1.13e-11	15.8307
RND1	1.60815	2.61856	6.98623	1.15e-11	15.815
SLC16A12	0.943059	0.605717	6.98529	1.15e-11	15.8092
PKMYT1	-0.921606	1.63816	-6.98435	1.16e-11	15.8033
TACC3	-0.979507	2.93441	-6.98198	1.18e-11	15.7886
B3GNT2	-0.690104	3.9778	-6.98135	1.18e-11	15.7847
POLQ	-0.673828	0.85529	-6.98035	1.19e-11	15.7785
ADA	-0.856281	1.98924	-6.96472	1.31e-11	15.6815
TPM1	-0.977151	3.40717	-6.95962	1.36e-11	15.6498
UNC13B	1.03504	2.71203	6.95848	1.37e-11	15.6428
AC010273.3	0.845919	1.03575	6.958	1.37e-11	15.6398
TK1	-1.41638	4.98223	-6.95788	1.37e-11	15.639
COTL1	-1.11157	4.55398	-6.9577	1.37e-11	15.6379
NEDD9	1.26329	3.51242	6.95384	1.41e-11	15.614
CDCA4	-0.917214	2.96697	-6.95042	1.44e-11	15.5928
TARS1	-0.810118	4.79502	-6.94806	1.46e-11	15.5782
KIF14	-0.870453	1.32952	-6.94615	1.48e-11	15.5664
AGPS	-0.588851	3.14268	-6.94597	1.48e-11	15.5653
GBP2	-1.08229	3.93947	-6.93657	1.57e-11	15.5072
RECQL	-0.882075	2.82086	-6.93295	1.61e-11	15.4848
PSRC1	-0.869271	1.94535	-6.93277	1.61e-11	15.4836
TSPAN7	1.56466	2.13479	6.93144	1.62e-11	15.4754
IGF2BP2	-1.42248	2.537	-6.92344	1.71e-11	15.426
MTHFD2	-0.9089	2.78492	-6.9221	1.72e-11	15.4178
TROAP	-1.19112	2.00372	-6.91735	1.77e-11	15.3885
GGT6	1.72221	1.72858	6.91465	1.8e-11	15.3718
SPDL1	-0.673104	1.93527	-6.91132	1.84e-11	15.3513
SAMD9	-1.16481	2.52066	-6.91102	1.85e-11	15.3494
SLC16A4	1.67618	2.95619	6.9052	1.91e-11	15.3135
SFTPD	2.38843	3.7059	6.90386	1.93e-11	15.3053
KIF20B	-0.765999	1.78102	-6.90089	1.97e-11	15.287
LINC02159	0.860223	0.604444	6.90044	1.97e-11	15.2842
FRMD6	-1.08129	2.01116	-6.89247	2.07e-11	15.2352
UBA6	-0.716145	2.67254	-6.89114	2.09e-11	15.227
WIF1	2.16032	1.78021	6.89069	2.1e-11	15.2243
ATP1B3	-0.774174	5.10167	-6.88819	2.13e-11	15.2089
STAMBPL1	-0.614923	1.26858	-6.88051	2.24e-11	15.1617
MMP12	-2.34293	3.53733	-6.88046	2.24e-11	15.1614
MRPS36	0.674215	3.73815	6.87615	2.3e-11	15.1349
SFTA2	2.43509	5.88287	6.87572	2.31e-11	15.1322
NUP155	-0.8557	2.96631	-6.87445	2.32e-11	15.1245
CD81	0.844222	5.99842	6.87186	2.36e-11	15.1086
OAS2	-1.27716	3.69426	-6.87044	2.38e-11	15.0999
RELL1	-0.856242	2.63742	-6.86505	2.47e-11	15.0668
DONSON	-0.696937	2.38419	-6.85879	2.56e-11	15.0284
RSRC1	-0.609168	2.41987	-6.85498	2.63e-11	15.0051
PDIA3	0.860443	7.21231	6.85036	2.7e-11	14.9768
GBP5	-1.37392	2.19935	-6.84778	2.75e-11	14.961
WDR62	-0.83381	1.23749	-6.84703	2.76e-11	14.9564
PRRT1B	1.06962	1.12914	6.84345	2.82e-11	14.9345
HPRT1	-0.835321	4.68261	-6.83836	2.92e-11	14.9034
MASTL	-0.64142	2.17607	-6.83342	3.01e-11	14.8732
SLC16A11	0.794299	0.806432	6.83126	3.05e-11	14.86
SNX10	-1.11142	3.02555	-6.82958	3.08e-11	14.8497
POGLUT3	-0.809751	3.69289	-6.82713	3.13e-11	14.8348
C6orf120	-0.698218	3.18929	-6.8256	3.16e-11	14.8255
SPINK14	0.589946	0.324544	6.82439	3.18e-11	14.8181
FBXW4	0.709082	3.44535	6.8221	3.23e-11	14.8041
FN1	-1.59552	7.32676	-6.82044	3.26e-11	14.794
FBXO45	-0.69337	2.49591	-6.81952	3.28e-11	14.7883
TGFBI	-1.61581	5.0693	-6.81793	3.31e-11	14.7787
SLC2A5	-0.920984	1.29383	-6.81709	3.33e-11	14.7735
PFKFB4	-0.890167	1.7527	-6.81449	3.38e-11	14.7576
KCNJ11	1.03196	1.24307	6.81215	3.43e-11	14.7434
SMC6	-0.600522	2.30148	-6.81208	3.44e-11	14.743
STEAP2	-1.31371	2.43544	-6.81135	3.45e-11	14.7385
SIAE	0.908836	2.58444	6.79872	3.73e-11	14.6616
TAP1	-1.27063	4.82257	-6.79726	3.77e-11	14.6527
CDC25A	-0.758846	1.26888	-6.79155	3.91e-11	14.618
CDK2	-0.673989	3.00069	-6.78997	3.94e-11	14.6084
C9orf152	1.56553	2.62367	6.78785	4e-11	14.5955
RPS6KA2	1.06218	3.74099	6.77866	4.23e-11	14.5397
BHLHE41	-1.15626	2.58811	-6.77687	4.28e-11	14.5289
HS2ST1	-0.704577	2.94851	-6.77642	4.29e-11	14.5261
MALL	1.34058	2.92955	6.77539	4.32e-11	14.5199
LHFPL2	-0.960942	3.21605	-6.77365	4.37e-11	14.5093
CHID1	0.731217	4.10657	6.77233	4.4e-11	14.5013
TSPAN33	-0.97809	2.45189	-6.77021	4.46e-11	14.4884
RPL39L	-1.54135	3.83312	-6.76767	4.53e-11	14.473
POT1	-0.606313	2.0556	-6.76253	4.68e-11	14.4419
FANCA	-0.659735	1.39319	-6.76085	4.73e-11	14.4317
FRMD5	-0.771801	1.1486	-6.75764	4.82e-11	14.4123
SLC7A7	-0.994862	2.93835	-6.75756	4.83e-11	14.4118
SIRPA	-1.05009	3.59119	-6.74933	5.08e-11	14.3619
RASD1	2.19901	4.58763	6.74587	5.19e-11	14.341
ATP2C1	-0.693289	4.05869	-6.74359	5.26e-11	14.3272
RFC5	-0.68919	2.63082	-6.74183	5.32e-11	14.3166
NCAPD3	-0.70331	2.08588	-6.73965	5.39e-11	14.3034
TPM4	-0.775577	5.2939	-6.73517	5.54e-11	14.2764
BCAM	1.59964	5.47365	6.73459	5.56e-11	14.2729
BACH1	-0.763557	3.14081	-6.72874	5.77e-11	14.2375
ZNF93	-0.642334	1.07033	-6.7285	5.78e-11	14.2361
CRY2	0.762399	2.96897	6.72752	5.81e-11	14.2302
KIF18A	-0.723218	1.49126	-6.72364	5.95e-11	14.2068
UBE2L6	-1.05077	5.6471	-6.72248	6e-11	14.1998
GREM1	-1.52595	2.1889	-6.71422	6.31e-11	14.15
PLIN2	-1.21045	4.02572	-6.70887	6.52e-11	14.1178
PSMB9	-1.35078	4.28344	-6.70704	6.6e-11	14.1068
SKAP2	-0.847802	3.83925	-6.70667	6.61e-11	14.1045
AC116407.1	0.763224	0.918481	6.70517	6.67e-11	14.0955
EIF4EBP1	-1.3582	5.43985	-6.70084	6.85e-11	14.0695
PLOD2	-1.5128	3.94186	-6.69099	7.28e-11	14.0103
UBE2T	-1.18166	3.60989	-6.6824	7.68e-11	13.9587
OASL	-1.19096	2.16766	-6.67024	8.28e-11	13.8858
ANKIB1	-0.675305	3.54657	-6.66627	8.48e-11	13.862
IL4I1	-1.40839	2.84591	-6.66412	8.59e-11	13.8491
LINC01614	-1.37973	1.81846	-6.66403	8.6e-11	13.8485
NRM	-0.905602	3.17386	-6.66237	8.69e-11	13.8386
CAPN9	1.45891	1.37792	6.66106	8.76e-11	13.8308
POLE2	-0.846074	1.73936	-6.65861	8.89e-11	13.8161
HAGH	0.620847	2.94867	6.65035	9.35e-11	13.7667
WFDC2	2.02344	7.26427	6.64781	9.5e-11	13.7515
AL162511.1	0.99546	0.775479	6.64557	9.63e-11	13.7381
VRK1	-0.737686	2.69185	-6.64504	9.66e-11	13.735
BLM	-0.634055	1.15304	-6.64225	9.83e-11	13.7183
CDCA2	-0.843753	1.46843	-6.64138	9.88e-11	13.7131
COL5A2	-1.48711	4.72712	-6.63716	1.01e-10	13.6879
PIMREG	-1.03035	1.72393	-6.6341	1.03e-10	13.6696
AC027288.1	0.871025	0.519798	6.6335	1.04e-10	13.666
STMN1	-1.23276	4.50081	-6.63007	1.06e-10	13.6456
AVL9	-0.693077	2.82409	-6.62961	1.06e-10	13.6428
DNMT1	-0.739142	2.89446	-6.6294	1.06e-10	13.6416
CTSV	-1.17874	1.45089	-6.62626	1.08e-10	13.6229
RIPK2	-0.824071	3.51698	-6.62472	1.09e-10	13.6137
SMS	-0.755267	5.44906	-6.61832	1.14e-10	13.5756
TMEM51	-0.870997	3.77795	-6.61805	1.14e-10	13.574
MAP7D3	-0.586916	1.1808	-6.615	1.16e-10	13.5558
CD63	0.871139	8.48554	6.61364	1.17e-10	13.5477
ANGPTL2	-1.17046	3.9848	-6.61352	1.17e-10	13.547
AQP3	2.16484	6.34265	6.61039	1.19e-10	13.5284
BNIPL	1.36238	1.6777	6.60847	1.21e-10	13.517
NABP1	-0.87404	1.71015	-6.60385	1.24e-10	13.4895
MSLN	3.46512	5.02504	6.60185	1.26e-10	13.4776
NRIP1	-1.03914	2.85007	-6.59997	1.27e-10	13.4664
TNFAIP3	-1.08345	3.66511	-6.59974	1.27e-10	13.465
NUDT1	-0.831722	3.07128	-6.59945	1.28e-10	13.4633
HERC5	-0.851523	1.88301	-6.59601	1.3e-10	13.4429
GPC6	-1.27451	1.85527	-6.59538	1.31e-10	13.4392
KIF3C	-1.01025	2.03027	-6.5912	1.34e-10	13.4144
CLMP	-1.18496	2.15233	-6.59028	1.35e-10	13.4089
CCNB1	-1.26027	4.12461	-6.58879	1.36e-10	13.4
ARHGAP11A	-0.851445	1.67781	-6.58863	1.36e-10	13.3991
TBC1D1	-0.759312	2.58222	-6.586	1.39e-10	13.3835
CDC25C	-0.760871	1.30247	-6.58334	1.41e-10	13.3677
ITGB8	-1.39845	1.743	-6.58198	1.42e-10	13.3597
ARL5B	-0.76322	2.94324	-6.57541	1.48e-10	13.3207
ZNF92	-0.689365	2.3507	-6.57417	1.49e-10	13.3134
APOL2	-0.869258	4.16774	-6.57377	1.49e-10	13.311
C15orf48	-1.7669	3.42472	-6.57357	1.49e-10	13.3098
CCNF	-0.711355	1.89159	-6.57225	1.51e-10	13.302
AC008972.2	0.74084	1.35377	6.56828	1.54e-10	13.2785
MEGF9	0.99485	3.58082	6.56367	1.59e-10	13.2512
GOLIM4	-0.776083	3.95757	-6.54719	1.75e-10	13.1538
CLU	1.84612	5.09757	6.54493	1.78e-10	13.1405
USP1	-0.667561	3.95052	-6.54098	1.82e-10	13.1172
PLEKHO1	-0.885438	3.08637	-6.54054	1.83e-10	13.1146
ADGRF4	-1.23396	1.38221	-6.54049	1.83e-10	13.1143
GPR137B	-0.835185	3.37498	-6.53624	1.87e-10	13.0892
PLA2G4F	0.948336	1.23218	6.53491	1.89e-10	13.0814
AK4	-1.20885	2.14086	-6.53341	1.91e-10	13.0725
RAP2B	-0.718686	3.22252	-6.53072	1.94e-10	13.0567
MAST4	0.82472	2.06067	6.52512	2e-10	13.0238
SKA2	-0.726021	3.75541	-6.51605	2.12e-10	12.9704
RMI2	-0.820026	2.47433	-6.51416	2.14e-10	12.9593
RBPMS	0.998973	3.00962	6.50657	2.24e-10	12.9146
GADD45G	1.43066	3.3921	6.50579	2.25e-10	12.91
MIR6071	0.958972	0.648627	6.49803	2.36e-10	12.8645
HPN	1.63939	3.46968	6.49362	2.42e-10	12.8386
DDX60	-1.12169	2.93847	-6.4812	2.61e-10	12.7659
PCYOX1	0.662032	4.48647	6.47939	2.64e-10	12.7553
CLEC2B	-1.08052	2.66689	-6.47707	2.68e-10	12.7417
PXMP4	1.0014	2.65248	6.47569	2.7e-10	12.7336
BORCS7	0.606925	3.04224	6.4704	2.79e-10	12.7027
HSD17B11	0.885225	4.99481	6.46671	2.85e-10	12.6811
PLD1	-0.631517	1.43683	-6.46218	2.93e-10	12.6546
RCC2	-0.709638	5.21092	-6.44604	3.23e-10	12.5605
POSTN	-1.50797	5.45974	-6.44559	3.23e-10	12.5578
CERS6	-0.86873	2.48196	-6.44154	3.31e-10	12.5342
MLPH	1.39661	4.28993	6.44107	3.32e-10	12.5315
PTPRH	-1.36589	2.05912	-6.43966	3.35e-10	12.5233
GJB2	-1.78442	3.4868	-6.43499	3.45e-10	12.4961
FPR3	-1.23825	3.6473	-6.43347	3.48e-10	12.4872
GNPTG	0.69285	4.01562	6.43196	3.51e-10	12.4784
TYMS	-0.730177	1.7429	-6.43182	3.51e-10	12.4776
RAB8B	-0.824668	3.04647	-6.42604	3.64e-10	12.444
BORA	-0.594679	1.39518	-6.41724	3.83e-10	12.3929
TNFSF13B	-1.08822	2.8256	-6.41412	3.9e-10	12.3748
DDX58	-0.854756	3.14661	-6.41255	3.94e-10	12.3656
PCDH7	-1.18672	1.59555	-6.41093	3.98e-10	12.3562
TNFSF4	-0.742688	1.24153	-6.40792	4.05e-10	12.3388
CLMN	-0.795194	1.55901	-6.40788	4.05e-10	12.3385
MOAP1	0.634584	3.77083	6.40502	4.12e-10	12.322
ARNTL2	-1.32212	2.40752	-6.40501	4.12e-10	12.3219
FOXA2	1.74678	2.77544	6.39769	4.3e-10	12.2795
AC020978.4	0.657383	0.827002	6.39637	4.34e-10	12.2719
ERO1B	1.11765	2.10572	6.39416	4.4e-10	12.259
MED11	0.59869	2.74135	6.39351	4.41e-10	12.2553
SLC16A1	-1.35938	2.36852	-6.3929	4.43e-10	12.2517
PSPH	-0.950892	2.9865	-6.39287	4.43e-10	12.2515
RPL10P19	0.642434	0.685317	6.39137	4.47e-10	12.2429
CMTM3	-0.985775	4.28353	-6.37957	4.79e-10	12.1746
CD300A	-0.952261	2.70525	-6.37573	4.91e-10	12.1525
MRPS25	0.80574	3.02654	6.37547	4.91e-10	12.1509
C1orf210	1.03135	3.79309	6.37276	4.99e-10	12.1353
APOBEC3G	-0.92777	2.19866	-6.37247	5e-10	12.1336
CYB5A	1.13549	3.8501	6.37159	5.03e-10	12.1285
ANKRD22	-1.28496	2.70012	-6.36836	5.12e-10	12.1099
CCL11	-1.18644	1.57256	-6.36068	5.36e-10	12.0656
ST6GALNAC5	-0.81339	1.22063	-6.35641	5.5e-10	12.0409
FASN	1.30321	4.9218	6.35287	5.62e-10	12.0206
ADAM19	-0.97561	2.34345	-6.34675	5.82e-10	11.9853
FBXO32	-1.15291	3.2747	-6.34488	5.89e-10	11.9746
IRS1	-1.00374	2.47676	-6.34411	5.92e-10	11.9701
ZNF256	-0.666718	1.53069	-6.34332	5.94e-10	11.9656
DSE	-0.782248	1.43927	-6.33891	6.1e-10	11.9402
TNC	-1.92055	4.48795	-6.3362	6.2e-10	11.9246
FAM102B	-0.749231	1.8355	-6.33602	6.21e-10	11.9236
BARX1-DT	0.636004	0.271667	6.33596	6.21e-10	11.9233
SULT1A1	0.696073	1.34746	6.33323	6.31e-10	11.9076
CD86	-0.961941	2.70931	-6.33145	6.38e-10	11.8974
PPT2	-0.644727	1.41193	-6.33096	6.39e-10	11.8945
GPR176	-0.914536	1.81136	-6.33006	6.43e-10	11.8894
CPD	-1.14618	4.81014	-6.32959	6.45e-10	11.8867
KLHL7	-0.61763	2.6281	-6.32554	6.6e-10	11.8634
ESRP2	0.878065	3.83762	6.32552	6.6e-10	11.8633
ZNF217	-0.806438	3.94357	-6.32476	6.63e-10	11.8589
OAS3	-1.08882	4.0131	-6.31149	7.17e-10	11.7829
ITGA2	-1.58683	3.65863	-6.31123	7.18e-10	11.7813
ZNF385B	1.17776	1.15327	6.30987	7.24e-10	11.7736
FYB1	-1.0699	2.29104	-6.304	7.5e-10	11.7399
OPA1	-0.616849	3.18938	-6.30298	7.54e-10	11.7341
B3GALNT1	-0.811578	1.54702	-6.29849	7.74e-10	11.7084
LSG1	-0.615692	3.4839	-6.29435	7.93e-10	11.6847
COL3A1	-1.60309	8.03916	-6.29312	7.99e-10	11.6777
SULF2	-1.05961	3.00393	-6.29157	8.06e-10	11.6689
PIF1	-0.656181	0.969165	-6.28986	8.15e-10	11.6591
LILRB2	-0.943573	2.05511	-6.28934	8.17e-10	11.6561
TNS3	-0.818317	3.89317	-6.28495	8.38e-10	11.631
LAT2	-0.837618	2.40186	-6.28455	8.4e-10	11.6287
PPP1R13B	0.780772	2.60898	6.28244	8.51e-10	11.6167
PHLDB2	-0.931081	1.6846	-6.27571	8.85e-10	11.5783
FNDC3B	-0.762314	3.67191	-6.27293	9e-10	11.5625
SLC48A1	0.621446	2.87079	6.27247	9.02e-10	11.5599
EGLN3	-1.53822	2.92996	-6.27034	9.13e-10	11.5477
PDCD1LG2	-0.978575	1.79938	-6.26414	9.47e-10	11.5124
E2F7	-0.692368	0.830384	-6.26381	9.49e-10	11.5105
BRI3BP	-0.68755	2.56538	-6.26058	9.67e-10	11.4921
TMEM65	-0.820286	2.43715	-6.25974	9.72e-10	11.4874
SNX6	-0.752371	4.50939	-6.25889	9.77e-10	11.4825
B3GNT5	-0.94851	2.30845	-6.25529	9.98e-10	11.462
HSD17B13	0.838501	0.523698	6.25349	1.01e-09	11.4518
HMGB2	-0.937722	5.23614	-6.25271	1.01e-09	11.4473
DOCK11	-0.934163	2.26508	-6.25139	1.02e-09	11.4398
PIP4P2	-0.615448	1.72792	-6.24707	1.05e-09	11.4153
STK38L	-0.741486	2.97197	-6.24596	1.05e-09	11.409
PRIM1	-0.663045	1.48061	-6.24442	1.06e-09	11.4003
CHAF1B	-0.681973	1.88752	-6.24397	1.07e-09	11.3977
STK17A	-0.846355	3.56067	-6.24171	1.08e-09	11.3848
MUC1	1.66365	6.90563	6.24105	1.08e-09	11.3811
ZKSCAN1	-0.783283	3.1929	-6.2386	1.1e-09	11.3672
ECT2	-0.993951	3.44562	-6.23443	1.13e-09	11.3435
EML4	-0.76949	4.14687	-6.23033	1.15e-09	11.3203
VOPP1	-0.756545	3.66089	-6.21424	1.27e-09	11.2292
MXD1	-0.859027	2.62289	-6.21171	1.29e-09	11.2149
TENM1	0.874027	0.475821	6.21138	1.29e-09	11.213
TAP2	-0.845546	2.94397	-6.20892	1.31e-09	11.1991
ST3GAL5	1.12793	2.41991	6.20731	1.32e-09	11.19
RPA3	-0.671458	3.27138	-6.20595	1.33e-09	11.1824
PLXNC1	-0.836168	2.12112	-6.20394	1.35e-09	11.171
SKP2	-0.690335	1.35254	-6.20303	1.35e-09	11.1658
CXCL11	-1.50315	2.15257	-6.20034	1.37e-09	11.1507
C1QTNF6	-0.908339	2.30688	-6.19747	1.4e-09	11.1344
BBX	-0.659683	2.72347	-6.19501	1.42e-09	11.1205
GINS4	-0.672862	1.08857	-6.19153	1.45e-09	11.1009
SLC38A1	-1.12073	3.6163	-6.19113	1.45e-09	11.0987
SPAG1	-0.823988	2.34602	-6.19068	1.45e-09	11.0962
UBTD1	0.96286	4.04741	6.1895	1.46e-09	11.0895
PPFIBP1	-0.737549	2.39057	-6.18906	1.47e-09	11.087
PALLD	-0.96304	3.98385	-6.1864	1.49e-09	11.072
PKP1	1.77744	1.55435	6.18573	1.5e-09	11.0682
SPP1	-2.2315	7.05246	-6.18119	1.54e-09	11.0426
MAPK6	-0.699385	3.42633	-6.17929	1.55e-09	11.032
PIP5KL1	0.892963	1.67661	6.17923	1.55e-09	11.0316
AQP7	0.769838	0.684664	6.17424	1.6e-09	11.0035
TCIM	1.66614	6.63483	6.16878	1.65e-09	10.9728
NECAB3	0.9323	3.35594	6.16618	1.68e-09	10.9582
KLF10	-0.666324	4.36706	-6.16303	1.71e-09	10.9405
SLPI	2.30381	7.84167	6.1505	1.83e-09	10.8702
ALPL	1.94108	3.93636	6.15005	1.84e-09	10.8677
GALNT6	-1.29887	3.22762	-6.14801	1.86e-09	10.8562
HAVCR2	-1.0371	3.06788	-6.14362	1.91e-09	10.8316
NEMP1	-0.739774	2.77258	-6.14268	1.92e-09	10.8263
ALDH3B1	1.3067	3.81932	6.13897	1.96e-09	10.8056
TSC22D1	0.773977	4.68586	6.13816	1.97e-09	10.801
CA8	0.858712	0.72912	6.13539	2e-09	10.7855
INHBA	-1.23619	2.72449	-6.13194	2.04e-09	10.7662
WDR53	-0.585354	2.71279	-6.1279	2.09e-09	10.7436
MDFIC	-0.931265	3.82011	-6.1276	2.09e-09	10.742
NLRC5	-0.875084	2.44536	-6.12537	2.12e-09	10.7295
PTAFR	-1.11472	3.15209	-6.12537	2.12e-09	10.7295
TRIM69	-0.657941	2.36796	-6.12293	2.15e-09	10.7158
PLAU	-1.72243	5.16173	-6.12272	2.15e-09	10.7147
STK4	-0.586506	2.8415	-6.11958	2.19e-09	10.6971
IFIT2	-0.927323	2.68438	-6.11771	2.22e-09	10.6867
NCAPD2	-0.855511	3.91971	-6.11401	2.26e-09	10.6661
PCLAF	-0.714047	1.4984	-6.10397	2.4e-09	10.6101
PHTF2	-0.626384	2.48992	-6.10335	2.41e-09	10.6066
GPR84	-0.861503	1.33601	-6.10232	2.42e-09	10.6008
TNFAIP6	-1.06871	2.15911	-6.10196	2.43e-09	10.5989
PRKD3	-0.696626	2.53125	-6.09572	2.51e-09	10.5641
RAB42	-0.891021	2.12365	-6.09345	2.55e-09	10.5515
MITF	-0.67914	1.66638	-6.08686	2.64e-09	10.5148
TMEM132A	-1.08797	3.02963	-6.08593	2.66e-09	10.5096
IGF2BP3	-1.13937	1.21345	-6.08577	2.66e-09	10.5087
AP000695.1	-0.588986	0.784031	-6.08128	2.73e-09	10.4838
LTA4H	0.711339	4.67376	6.07119	2.89e-09	10.4278
RTP4	-1.03841	2.51723	-6.07078	2.9e-09	10.4255
BCL10	-0.638598	3.12757	-6.06943	2.92e-09	10.418
ADM	-1.41622	3.21561	-6.06898	2.93e-09	10.4155
ERO1A	-0.987046	4.88204	-6.06656	2.97e-09	10.4021
SORBS2	0.991759	1.50475	6.06383	3.02e-09	10.387
POGLUT2	-0.723325	1.82631	-6.06095	3.07e-09	10.371
TSC22D2	-0.76018	2.29282	-6.05995	3.08e-09	10.3654
EIF5A2	-0.595694	1.23871	-6.05842	3.11e-09	10.357
MECOM	1.12818	2.72644	6.05735	3.13e-09	10.3511
MPDU1	0.691027	4.29524	6.05734	3.13e-09	10.351
IRF5	-0.815303	2.48475	-6.05586	3.16e-09	10.3428
TMEM59	0.594744	5.31409	6.05107	3.24e-09	10.3163
LRR1	-0.648126	2.25522	-6.05003	3.26e-09	10.3105
THBS2	-1.54841	3.51255	-6.04981	3.27e-09	10.3093
CCDC57	0.614381	1.99962	6.04557	3.35e-09	10.2858
MICB	-0.866859	2.33095	-6.04524	3.35e-09	10.2841
CALHM2	-0.691999	2.54032	-6.0436	3.39e-09	10.275
CHP1	0.759147	5.32944	6.04255	3.41e-09	10.2692
PRKAB1	0.639301	3.53306	6.04112	3.43e-09	10.2613
MTURN	0.930167	2.45802	6.0383	3.49e-09	10.2457
PLBD1	-1.21587	3.84065	-6.03604	3.53e-09	10.2332
CXCL9	-2.04855	4.52782	-6.03529	3.55e-09	10.2291
ATAD5	-0.617	1.24174	-6.03206	3.61e-09	10.2113
TMEM150A	0.823909	3.45012	6.03189	3.62e-09	10.2103
TFCP2L1	1.3202	2.55985	6.03144	3.63e-09	10.2078
ANKRD9	0.702994	1.91386	6.02143	3.84e-09	10.1526
CENPH	-0.730016	2.36827	-6.01923	3.89e-09	10.1405
PDK1	-0.693294	1.77587	-6.01642	3.95e-09	10.1251
EGFL7	1.16118	3.90822	6.01338	4.02e-09	10.1083
AC008703.1	0.655037	0.415395	6.00924	4.11e-09	10.0855
PHPT1	0.900094	5.10336	6.00815	4.14e-09	10.0795
TDP1	-0.62024	1.91839	-6.00707	4.17e-09	10.0736
AMIGO2	-1.35501	4.00679	-6.00702	4.17e-09	10.0733
SNX7	-0.785026	3.52256	-6.00668	4.18e-09	10.0714
YKT6	-0.595564	4.25108	-6.00595	4.19e-09	10.0675
CCL4	-1.11795	2.69658	-6.00363	4.25e-09	10.0547
VAMP2	0.716352	3.90326	6.00321	4.26e-09	10.0524
APOBEC3B	-1.17346	1.79781	-5.9984	4.38e-09	10.0259
AVPI1	1.17371	3.94376	5.99676	4.42e-09	10.0169
TUBB6	-0.988472	3.66939	-5.9962	4.43e-09	10.0139
GZMB	-1.39697	2.84556	-5.99552	4.45e-09	10.0101
SNED1	0.66265	1.481	5.99207	4.54e-09	9.9912
FBXL15	0.688046	2.36125	5.99054	4.57e-09	9.98278
CD274	-1.20928	2.13024	-5.98977	4.59e-09	9.97854
OTULIN	-0.657199	2.44114	-5.98562	4.7e-09	9.95579
COL12A1	-1.65522	3.26836	-5.98232	4.79e-09	9.9377
CCDC71L	-0.73601	2.84137	-5.97995	4.86e-09	9.92472
SNX8	-0.79076	3.27348	-5.97914	4.88e-09	9.92032
CCL8	-1.40091	2.29118	-5.97755	4.92e-09	9.91159
EEPD1	-0.649026	1.71217	-5.97656	4.95e-09	9.90618
AL353807.5	-0.8688	1.64711	-5.96996	5.14e-09	9.87003
PRDM16	0.906132	1.03006	5.96932	5.16e-09	9.86655
PTPRE	0.811613	2.62271	5.96829	5.19e-09	9.86089
SPAG7	0.616931	3.91804	5.96809	5.19e-09	9.85983
AKR1C1	2.616	2.58891	5.96222	5.37e-09	9.82774
CD55	1.24961	5.78584	5.96183	5.38e-09	9.82557
HLTF	-0.859358	2.39512	-5.96149	5.39e-09	9.82372
HROB	-0.760082	1.70243	-5.96031	5.43e-09	9.81729
RNU6-403P	1.7946	2.51969	5.95862	5.48e-09	9.80805
PDLIM3	-0.913984	1.90189	-5.95819	5.49e-09	9.80571
ATP8A1	1.05182	2.21181	5.95678	5.53e-09	9.79801
CENPQ	-0.651501	2.44915	-5.95574	5.57e-09	9.79233
PDPN	-1.17918	3.01343	-5.95389	5.63e-09	9.78225
AMBP	1.59749	1.1443	5.9526	5.67e-09	9.77517
PTCSC3	1.18549	1.2242	5.95209	5.68e-09	9.7724
WIPF1	-0.823512	3.13312	-5.95058	5.73e-09	9.76417
ARL6IP6	-0.617056	2.79747	-5.94935	5.77e-09	9.75746
WTIP	0.603089	1.04583	5.94917	5.78e-09	9.75649
RASAL2	-0.670001	1.8524	-5.94711	5.84e-09	9.74525
ANKRD29	0.939608	1.41106	5.94505	5.91e-09	9.73402
TMEM108	0.790351	1.03983	5.94408	5.94e-09	9.72874
COL11A1	-1.86131	2.42824	-5.9425	6e-09	9.72011
SEMA3A	-1.21322	1.65478	-5.94226	6.01e-09	9.71878
SECISBP2L	0.759056	3.14734	5.94193	6.02e-09	9.71699
TDRP	0.913066	2.83529	5.93885	6.12e-09	9.70023
NENF	0.787691	5.60583	5.93675	6.19e-09	9.68878
HUNK	0.715026	0.868903	5.93622	6.21e-09	9.68589
AP003498.2	1.07171	1.85719	5.92397	6.65e-09	9.61927
DAAM2	0.78428	1.22852	5.92266	6.7e-09	9.61216
GNA12	-0.667405	4.10892	-5.91946	6.82e-09	9.59475
MEIS3P2	0.751882	0.877628	5.91652	6.94e-09	9.57879
IFI44	-1.30534	4.12639	-5.91314	7.07e-09	9.56043
RAB32	-0.881814	4.42551	-5.9128	7.08e-09	9.55861
MBIP	1.12816	4.36692	5.91169	7.13e-09	9.55258
TMEM63B	0.756999	4.52532	5.91089	7.16e-09	9.54822
RPL26P30	0.871634	0.712535	5.90871	7.25e-09	9.53639
GBP4	-1.16828	3.27876	-5.90574	7.37e-09	9.52029
XPOT	-0.690052	4.07579	-5.90405	7.44e-09	9.51116
MARCKSL1	-0.99958	7.04004	-5.90375	7.45e-09	9.50952
BICC1	-0.971148	1.89298	-5.90334	7.47e-09	9.50728
ITGA5	-1.06317	3.82516	-5.8991	7.65e-09	9.48435
TBC1D4	-0.646142	2.1354	-5.89691	7.74e-09	9.47245
MTARC2	0.803808	2.63883	5.89363	7.89e-09	9.4547
SIGLEC10	-0.901639	1.72926	-5.89153	7.98e-09	9.44335
CCND3	0.853723	4.37115	5.89012	8.04e-09	9.43574
ARV1	0.596299	3.40884	5.8865	8.2e-09	9.41617
DAPP1	-0.9034	2.38829	-5.88609	8.22e-09	9.41393
RHBDL1	0.993576	1.65076	5.88293	8.37e-09	9.39684
TLCD2	0.608472	1.72147	5.88251	8.39e-09	9.39459
NCS1	-0.810234	2.39261	-5.87944	8.53e-09	9.37803
CCNE2	-0.616991	1.01624	-5.87662	8.67e-09	9.36275
GLIPR1	-0.782517	2.06104	-5.87657	8.67e-09	9.36248
CDHR3	1.01072	0.814581	5.87565	8.72e-09	9.35755
CEBPD	1.08821	6.07855	5.87219	8.89e-09	9.33884
MIS18BP1	-0.684373	2.53399	-5.87193	8.9e-09	9.33747
SLC4A7	-0.788165	1.94334	-5.87162	8.91e-09	9.33578
SLC25A13	-0.640326	3.58334	-5.86739	9.13e-09	9.313
MAST2	-0.626188	3.19304	-5.86538	9.23e-09	9.30215
ALDH1B1	-0.785863	3.88863	-5.8652	9.24e-09	9.30115
BCAT2	0.72634	3.30271	5.85992	9.51e-09	9.27272
PALM2AKAP2	-0.764736	2.54911	-5.8452	1.03e-08	9.19356
ADAMTS12	-0.971847	1.96183	-5.84435	1.04e-08	9.18895
SLAMF8	-0.877445	1.73227	-5.83663	1.08e-08	9.1475
SPRY4	0.872277	3.14171	5.83437	1.1e-08	9.13537
TNFAIP8	-0.717785	2.18145	-5.83328	1.1e-08	9.12955
FCGRT	0.837409	5.27518	5.8256	1.15e-08	9.08835
RARRES1	-1.43802	3.69507	-5.82353	1.16e-08	9.07727
TMTC3	-0.637803	2.60362	-5.82273	1.17e-08	9.07298
INPP4B	-0.863022	1.73856	-5.82109	1.18e-08	9.06418
CCT6A	-0.722955	5.98763	-5.8195	1.19e-08	9.05566
LMNB2	-0.834734	3.99126	-5.81672	1.21e-08	9.04077
IL15RA	-0.772657	2.83906	-5.81354	1.23e-08	9.02378
DACT1	-0.793352	1.52932	-5.81193	1.24e-08	9.01517
AL109936.2	0.668419	0.890341	5.81013	1.25e-08	9.00556
SDCBP	-0.586859	5.60437	-5.80502	1.29e-08	8.97821
TFAP2E	0.591931	0.928716	5.80332	1.3e-08	8.96917
PRR5L	-0.758347	1.72507	-5.80113	1.32e-08	8.95746
CLSTN1	-0.702761	5.58244	-5.8008	1.32e-08	8.9557
GLIPR2	-0.911509	3.50485	-5.80065	1.32e-08	8.95486
GCNT1	-0.892069	1.70631	-5.79759	1.34e-08	8.93856
OR2I1P	-1.3362	1.98685	-5.79657	1.35e-08	8.93309
PATL1	-0.600909	3.89098	-5.78843	1.41e-08	8.88969
GALNT3	-1.15436	3.92275	-5.78756	1.42e-08	8.88508
ZBED2	-0.918114	1.48165	-5.78132	1.47e-08	8.85184
LNX2	0.668257	3.03962	5.78027	1.48e-08	8.84621
NCOA3	-0.644552	3.43116	-5.77995	1.48e-08	8.84455
LCP1	-1.12062	5.15203	-5.77861	1.49e-08	8.83741
TMEM158	-1.01059	1.61184	-5.7784	1.49e-08	8.83629
TMEM263	-0.630929	4.20653	-5.77542	1.52e-08	8.82042
AC004130.2	-0.825865	1.2684	-5.77425	1.53e-08	8.81419
EIF2AK2	-0.61202	3.31919	-5.77002	1.56e-08	8.79172
ZNFX1	-0.625262	3.60446	-5.76678	1.59e-08	8.77447
TNFRSF9	-0.75062	1.1502	-5.76362	1.62e-08	8.7577
IFI44L	-1.27322	2.22592	-5.76183	1.63e-08	8.74818
CYB5R1	0.629022	4.27175	5.75938	1.66e-08	8.73519
UCK2	-0.858518	1.94082	-5.75414	1.71e-08	8.70738
ASPG	0.632103	0.336578	5.75291	1.72e-08	8.70086
BCL2A1	-1.10512	3.2789	-5.74473	1.8e-08	8.6575
RFC2	-0.647469	4.09875	-5.74427	1.8e-08	8.6551
IFIT3	-1.03355	4.2339	-5.74336	1.81e-08	8.65025
LAPTM5	-1.10771	5.5015	-5.74257	1.82e-08	8.64611
PC	0.774632	2.55108	5.7403	1.84e-08	8.63409
BAG1	0.723638	3.63898	5.73809	1.86e-08	8.6224
AC127526.5	1.02745	2.31309	5.73773	1.87e-08	8.62047
ACAP2	-0.649615	2.69354	-5.73757	1.87e-08	8.61964
SAPCD2	-0.850923	1.87172	-5.73621	1.88e-08	8.61243
IL2RB	-1.00499	2.56402	-5.73352	1.91e-08	8.59821
PRR15L	1.40814	4.9576	5.73287	1.92e-08	8.59478
CISH	0.916086	3.01533	5.72811	1.97e-08	8.5696
CDH3	-1.59957	3.98137	-5.72743	1.97e-08	8.566
RMDN2	0.595398	1.29591	5.72648	1.98e-08	8.56103
CD53	-1.08504	4.92553	-5.72639	1.98e-08	8.56051
COL1A2	-1.38457	7.20488	-5.72065	2.05e-08	8.53021
LARP6	-0.655799	1.1434	-5.71818	2.08e-08	8.5172
PDK3	-0.6503	1.89119	-5.71578	2.1e-08	8.50452
DIP2B	-0.591237	2.81933	-5.70981	2.17e-08	8.47309
FCGR1A	-0.767632	1.56294	-5.70535	2.23e-08	8.4496
TTYH3	-0.925488	4.74049	-5.70533	2.23e-08	8.4495
OGFRL1	-0.793637	2.45297	-5.69926	2.3e-08	8.41751
ROR2	-0.701941	1.34609	-5.69829	2.31e-08	8.41244
RSAD2	-0.977683	2.40654	-5.69559	2.35e-08	8.39824
PMF1	0.595459	3.21514	5.69053	2.41e-08	8.37165
GAL3ST4	-0.817406	2.21146	-5.68682	2.46e-08	8.35216
BATF2	-0.959162	2.62574	-5.68619	2.47e-08	8.34888
NMI	-0.622966	3.45107	-5.68408	2.5e-08	8.33777
IL1B	-0.995181	1.76935	-5.68133	2.54e-08	8.32337
TLR6	-0.615615	1.20067	-5.67005	2.7e-08	8.26423
LILRB4	-1.06883	2.48941	-5.6686	2.72e-08	8.25662
TRAPPC1	0.704297	5.39388	5.66418	2.78e-08	8.23352
NPC2	1.12884	6.76496	5.65845	2.87e-08	8.20351
SIK1B	1.12744	2.03177	5.65617	2.91e-08	8.19159
IL1RAP	-0.775198	1.89847	-5.65292	2.96e-08	8.17463
DNAJC22	-0.985346	1.47689	-5.64936	3.01e-08	8.15605
SMDT1	0.641848	4.3592	5.64929	3.02e-08	8.15565
USP27X	0.82047	1.95408	5.64921	3.02e-08	8.15527
TIMP2	-0.995657	5.47559	-5.64845	3.03e-08	8.15128
DENND5B	-0.626077	1.27122	-5.64795	3.04e-08	8.1487
CLIP2	-0.737009	1.99527	-5.64602	3.07e-08	8.13859
ELOVL7	-0.853488	1.98025	-5.64547	3.08e-08	8.13575
ELK3	-0.780871	4.13081	-5.64509	3.08e-08	8.13377
FAM174B	0.946398	3.1546	5.64465	3.09e-08	8.13145
USP18	-0.741791	2.8411	-5.64433	3.1e-08	8.12977
DNM1	-0.653632	1.22083	-5.64423	3.1e-08	8.12925
MIR22HG	0.621423	2.72049	5.64053	3.16e-08	8.10995
LAMB1	-0.840798	3.14439	-5.63837	3.2e-08	8.09871
CSE1L	-0.639855	4.84029	-5.63715	3.22e-08	8.09236
G2E3	-0.630929	1.84503	-5.63246	3.3e-08	8.0679
PGM2L1	-0.817355	2.67871	-5.62927	3.36e-08	8.05131
RHBDF2	-0.728605	3.09768	-5.62541	3.43e-08	8.03122
AL137018.1	0.691748	0.334129	5.62517	3.43e-08	8.03
NETO2	-0.812384	2.22203	-5.62376	3.46e-08	8.02266
ADD3	-0.954183	3.65668	-5.62256	3.48e-08	8.01638
GXYLT2	-0.941978	1.90781	-5.62166	3.5e-08	8.01172
RANBP1	-0.654176	3.91293	-5.61878	3.55e-08	7.99674
CHST11	-0.84212	2.92479	-5.61855	3.56e-08	7.99555
CCL2	-1.12767	4.3	-5.61834	3.56e-08	7.99446
DDRGK1	0.71267	4.97795	5.61793	3.57e-08	7.99233
CYTH4	-0.763286	2.25812	-5.61554	3.62e-08	7.97991
AL034548.2	0.603607	1.11028	5.61544	3.62e-08	7.97943
DYRK2	-0.659827	2.49805	-5.61316	3.66e-08	7.96758
FUOM	-0.946152	2.77824	-5.61277	3.67e-08	7.96554
SFRP2	-1.82108	5.48272	-5.61235	3.68e-08	7.96336
FCER1G	-1.1144	5.60658	-5.6114	3.7e-08	7.95843
MYO5A	-0.618508	2.03083	-5.61049	3.72e-08	7.95372
LILRB1	-0.733847	1.6763	-5.60878	3.75e-08	7.94481
RIBC2	-0.773492	1.40607	-5.60872	3.75e-08	7.94453
CD151	0.832212	6.07458	5.60524	3.82e-08	7.92646
DDX60L	-0.73942	1.95171	-5.60402	3.85e-08	7.92016
DEK	-0.602775	4.50594	-5.60253	3.88e-08	7.9124
OBSL1	1.07043	2.84493	5.59631	4.01e-08	7.88018
LAP3	-0.643964	5.14561	-5.59507	4.04e-08	7.87375
MOB3B	-0.652747	1.68969	-5.59434	4.05e-08	7.87
ACADVL	0.683119	5.55003	5.59201	4.1e-08	7.85795
DUSP14	-0.609389	3.29373	-5.58775	4.2e-08	7.83587
HSD11B1	-0.998628	2.3755	-5.58767	4.2e-08	7.8355
G0S2	-1.57711	4.47771	-5.58354	4.29e-08	7.8141
SLC7A2	1.79126	2.7418	5.58349	4.29e-08	7.81386
TMEM38B	-0.69204	2.02616	-5.58242	4.32e-08	7.80834
COL6A3	-1.19269	5.14572	-5.58118	4.35e-08	7.80192
RNY3P8	0.975817	1.09768	5.57994	4.38e-08	7.79554
PARP9	-0.599899	3.79459	-5.57751	4.43e-08	7.783
CCL26	-0.688982	0.816834	-5.57613	4.47e-08	7.77587
RESF1	-0.860565	3.28089	-5.57534	4.48e-08	7.77176
IRS2	1.09812	2.73537	5.57275	4.55e-08	7.75841
MB21D2	-0.700923	1.72452	-5.5677	4.67e-08	7.73234
CRELD2	0.682315	3.50953	5.56732	4.68e-08	7.7304
OLFML2B	-0.98867	3.37834	-5.56262	4.8e-08	7.70618
CDK5R1	-0.666289	1.43255	-5.56119	4.84e-08	7.69882
KIF1C	0.587686	3.95305	5.55762	4.93e-08	7.68044
SRPX2	-1.10378	2.43344	-5.55528	4.99e-08	7.66838
LMAN2	0.690074	6.54434	5.55498	5e-08	7.66685
CDK6	-0.913609	1.91142	-5.55475	5e-08	7.66566
CRYBG1	-0.999358	2.65569	-5.55321	5.05e-08	7.65775
RIC1	-0.606322	2.08678	-5.55169	5.09e-08	7.64993
TMEM45A	-1.1788	2.39332	-5.55012	5.13e-08	7.64181
CRACR2B	1.04936	2.74571	5.55003	5.13e-08	7.64138
LAIR1	-0.857854	2.46059	-5.5432	5.32e-08	7.60629
RFLNA	-1.00948	1.28766	-5.5399	5.42e-08	7.58932
HOMER1	-0.617939	1.75883	-5.53294	5.62e-08	7.55362
MIS18A	-0.636637	3.20483	-5.52809	5.77e-08	7.52873
ENPP1	-0.601666	0.814111	-5.52285	5.93e-08	7.50192
AL008729.2	0.901111	2.69176	5.52135	5.98e-08	7.49423
FAAP24	-0.595958	1.72818	-5.52036	6.01e-08	7.48918
SSX2IP	-0.590758	1.75705	-5.51906	6.05e-08	7.48252
AZIN1	-0.594814	5.20926	-5.51886	6.06e-08	7.48148
ZNF107	-0.638867	1.78548	-5.51706	6.11e-08	7.47228
GPNMB	-1.25102	5.38593	-5.51686	6.12e-08	7.47127
OSGIN2	-0.666991	3.30204	-5.51629	6.14e-08	7.46836
UNG	-0.63081	4.16123	-5.51547	6.17e-08	7.46416
MSC	-0.866887	1.93953	-5.51491	6.18e-08	7.46128
PXDN	-1.11953	3.5552	-5.5132	6.24e-08	7.45254
ERP29	0.702323	6.08039	5.51273	6.26e-08	7.45016
SLC39A14	-0.838869	3.1907	-5.51001	6.35e-08	7.43621
HIGD1B	0.660581	1.37341	5.50704	6.45e-08	7.42108
CCR5	-0.878268	2.18431	-5.50414	6.55e-08	7.40623
TPT1	0.722945	7.54111	5.50092	6.66e-08	7.38982
FAP	-0.910695	1.92011	-5.4999	6.69e-08	7.38459
LCP2	-0.815762	2.65057	-5.49627	6.82e-08	7.36611
TSPAN5	-0.834675	2.46355	-5.49065	7.03e-08	7.33743
KIT	1.45909	2.8969	5.48882	7.1e-08	7.32814
PCBD1	0.666523	5.69666	5.4846	7.26e-08	7.30663
BICDL2	0.89725	2.45112	5.48249	7.34e-08	7.29589
GPD1L	0.84587	3.69107	5.47862	7.49e-08	7.27621
STUM	0.939309	0.570599	5.47588	7.6e-08	7.26228
TMEM156	-1.0403	1.75113	-5.47409	7.67e-08	7.2532
ZYG11A	-0.651581	0.807561	-5.47369	7.69e-08	7.25115
PRKDC	-0.810143	4.07043	-5.47352	7.69e-08	7.25031
CITED2	0.936489	5.24451	5.47303	7.71e-08	7.24782
CILP	-1.30366	1.88326	-5.47201	7.75e-08	7.24265
H2AZ1	-0.696611	5.82217	-5.4718	7.76e-08	7.24154
ARRB1	0.71927	2.68884	5.47066	7.81e-08	7.23575
BOK	0.861511	3.97806	5.46708	7.96e-08	7.21757
MPP1	-0.721015	2.49268	-5.466	8e-08	7.21214
RUNX3	-0.812466	2.2682	-5.46546	8.03e-08	7.20938
RASSF7	0.98679	4.50058	5.46199	8.17e-08	7.19175
TMEM80	0.703567	2.4658	5.45861	8.32e-08	7.17465
SPINT1-AS1	0.778832	2.37241	5.45793	8.35e-08	7.17117
NGEF	-0.964169	1.61299	-5.45576	8.45e-08	7.16021
NFKBIE	-0.691897	3.57003	-5.45563	8.45e-08	7.15951
PRRX1	-0.970149	2.66613	-5.452	8.61e-08	7.14115
ENTPD3	0.896382	1.97564	5.4516	8.63e-08	7.13912
CHSY1	-0.605419	3.33809	-5.45144	8.64e-08	7.13829
SAP30	-0.623438	2.71724	-5.44299	9.03e-08	7.09557
GLOD5	0.60201	1.03466	5.44215	9.07e-08	7.09131
PNKD	0.826107	4.60826	5.44055	9.15e-08	7.0832
BID	-0.624535	3.10826	-5.43854	9.24e-08	7.07307
CCL4L2	-0.968556	2.06993	-5.4344	9.45e-08	7.05215
PIGT	0.596195	3.4254	5.43193	9.57e-08	7.0397
PGAP3	0.821418	3.96283	5.4317	9.58e-08	7.03851
EMP2	0.825284	4.35828	5.43062	9.63e-08	7.03309
MYO1E	-0.738538	3.16793	-5.42919	9.71e-08	7.02583
SPINK5	1.36271	1.542	5.42643	9.85e-08	7.01191
LYPD5	-0.654195	0.935887	-5.42176	1.01e-07	6.98837
NUP62CL	-0.649392	1.54166	-5.41943	1.02e-07	6.97666
STYK1	-0.790192	1.98273	-5.41889	1.02e-07	6.97395
FOXC1	-0.932582	1.98081	-5.41873	1.03e-07	6.97314
KCTD17	-0.66365	2.63173	-5.41801	1.03e-07	6.9695
PLLP	0.86088	1.88851	5.41573	1.04e-07	6.958
RAB17	0.776759	2.81532	5.41458	1.05e-07	6.95222
AOAH	-0.864452	2.10763	-5.41161	1.06e-07	6.93728
EPHX2	0.727858	1.89216	5.40593	1.1e-07	6.9087
SEMA7A	-0.988828	2.50777	-5.40543	1.1e-07	6.90623
SLC1A3	-0.801127	1.74953	-5.40489	1.1e-07	6.90351
IL17RE	0.889036	2.34529	5.40217	1.12e-07	6.88985
DST	-0.933297	1.94232	-5.40166	1.12e-07	6.88725
KNSTRN	-0.67272	2.47291	-5.39748	1.15e-07	6.86626
GBP1P1	-0.861258	1.65512	-5.39615	1.15e-07	6.85958
PLXNA2	0.900525	2.37526	5.39574	1.16e-07	6.85754
KRTCAP3	1.14251	4.88608	5.39563	1.16e-07	6.857
CD72	-0.655975	1.5537	-5.39348	1.17e-07	6.84622
PECR	-0.645768	2.20185	-5.38902	1.2e-07	6.82383
TIAM1	-0.656897	1.36711	-5.38859	1.2e-07	6.82166
TMEM92	0.930779	2.774	5.38759	1.21e-07	6.81666
ALDH5A1	0.654086	2.35923	5.38486	1.22e-07	6.80298
NKX2-1	1.61815	4.80422	5.37751	1.27e-07	6.76618
LRRC25	-0.795146	2.28374	-5.37666	1.28e-07	6.76194
TMC4	0.977663	4.93343	5.37253	1.3e-07	6.74128
B4GALT4	-0.613387	2.50943	-5.37097	1.31e-07	6.73348
DNMT3B	-0.717986	1.31868	-5.36836	1.33e-07	6.72042
RHOBTB3	-0.929568	3.49863	-5.36822	1.33e-07	6.71976
FOXN2	-0.588442	2.62643	-5.35963	1.39e-07	6.67687
BAIAP2	0.691003	2.54201	5.35638	1.42e-07	6.66066
CCL7	-0.841759	1.02041	-5.35386	1.44e-07	6.64806
ASPHD2	-0.637864	1.27272	-5.35268	1.44e-07	6.64221
XRN1	-0.62156	2.42634	-5.35215	1.45e-07	6.63955
MEST	-0.755221	3.75386	-5.35137	1.45e-07	6.63567
CPXM1	-1.04005	2.67228	-5.3492	1.47e-07	6.62488
RALGPS2	-0.669989	2.36339	-5.34649	1.49e-07	6.61138
SLFN11	-0.883321	3.14914	-5.34406	1.51e-07	6.59927
TESMIN	-0.692555	0.948107	-5.34119	1.53e-07	6.58501
FAM3C	-0.838493	4.35368	-5.33997	1.54e-07	6.57891
ATP11B	-0.634195	3.08257	-5.33211	1.61e-07	6.53986
MUC16	-1.00659	1.14412	-5.33204	1.61e-07	6.53949
AL391121.1	0.604235	1.64276	5.32786	1.64e-07	6.51876
CTSH	1.19499	4.66439	5.32554	1.66e-07	6.50726
ATP11A	1.06259	4.19994	5.32084	1.7e-07	6.48395
TFAP2A	-0.832852	1.33258	-5.32011	1.71e-07	6.48031
SLC2A3	-1.03582	3.31708	-5.31556	1.75e-07	6.45779
SSPN	-0.697335	1.65847	-5.31504	1.75e-07	6.45522
HMGCS1	-0.796881	3.04732	-5.31431	1.76e-07	6.45158
ATP11C	-0.622916	2.16925	-5.31182	1.78e-07	6.43926
CKS2	-0.990459	5.39302	-5.3095	1.8e-07	6.42776
CDKN2C	-0.714723	2.53375	-5.30745	1.82e-07	6.41764
MMP9	-1.50335	4.28791	-5.30701	1.83e-07	6.41545
APOL3	-0.825854	2.73604	-5.30436	1.85e-07	6.40235
RHOB	0.925573	6.85589	5.30168	1.88e-07	6.38911
GMNN	-0.682887	3.16023	-5.30051	1.89e-07	6.38332
TIMELESS	-0.746628	3.21213	-5.30012	1.89e-07	6.38138
DGAT1	0.722221	3.68716	5.29811	1.91e-07	6.37146
RFC3	-0.659485	2.66365	-5.29645	1.93e-07	6.36323
PLXNA1	-0.728072	3.46263	-5.29558	1.94e-07	6.35897
RNASE1	1.36562	8.17299	5.29524	1.94e-07	6.35729
TRPS1	-0.74846	1.4549	-5.29513	1.94e-07	6.35673
HSPH1	-0.616052	3.90461	-5.29322	1.96e-07	6.34731
OVGP1	0.65793	1.3195	5.28882	2.01e-07	6.3256
MSLNL	0.9578	0.676552	5.28739	2.02e-07	6.31856
KLHL23	-0.713659	2.55431	-5.28713	2.02e-07	6.31729
ALDH3A1	1.91532	1.77805	5.2865	2.03e-07	6.31418
SERPINE2	-0.954332	2.0636	-5.286	2.04e-07	6.31168
EPB41L2	-0.710873	2.39906	-5.28148	2.08e-07	6.28943
GFPT2	-0.864399	2.15328	-5.28084	2.09e-07	6.28626
DRAM1	0.983509	4.57978	5.276	2.14e-07	6.26247
SAMSN1	-0.778047	2.03561	-5.27493	2.15e-07	6.25718
PMAIP1	-1.13269	3.28825	-5.273	2.17e-07	6.24771
AC015922.3	0.661747	3.20853	5.27218	2.18e-07	6.24364
PRRX2	-1.15605	2.07735	-5.27178	2.19e-07	6.24171
OSBPL8	-0.624643	3.28071	-5.27038	2.2e-07	6.23479
TPST1	-0.630702	3.19445	-5.266	2.25e-07	6.21327
CFI	0.702035	1.63517	5.26509	2.26e-07	6.20881
FAAH2	0.691576	2.91919	5.26498	2.27e-07	6.20827
GOLT1B	-0.677851	4.30956	-5.26417	2.28e-07	6.20427
ADCY3	-0.611857	2.32369	-5.26315	2.29e-07	6.19928
CYBB	-1.25508	4.48742	-5.26043	2.32e-07	6.18592
CCDC80	-1.08263	3.38503	-5.25947	2.33e-07	6.18122
TNFAIP2	-1.14988	4.57253	-5.25762	2.35e-07	6.17211
FAM171B	-0.743545	1.36962	-5.25605	2.37e-07	6.16442
C3AR1	-0.930368	2.86108	-5.2478	2.47e-07	6.124
IGFBP3	-1.28298	5.97516	-5.24728	2.48e-07	6.12142
STK10	-0.585246	2.53848	-5.2469	2.48e-07	6.1196
FYN	-0.677524	2.79402	-5.24347	2.53e-07	6.10278
SEC14L6	0.794849	1.12156	5.24266	2.54e-07	6.09884
CPAMD8	0.994669	1.46413	5.24131	2.56e-07	6.09223
HK2	-0.980237	3.77999	-5.24122	2.56e-07	6.09178
MSR1	-1.04168	2.90851	-5.24095	2.56e-07	6.09043
MCM7	-0.824867	4.87118	-5.23993	2.57e-07	6.08548
PBK	-1.0183	2.32723	-5.23658	2.62e-07	6.06909
EMCN	0.687713	1.55192	5.23544	2.63e-07	6.06353
PYROXD2	0.728085	1.96453	5.23049	2.7e-07	6.03931
SMO	-0.8621	1.87952	-5.2302	2.7e-07	6.0379
RNASE6	-0.899963	4.2093	-5.22945	2.71e-07	6.03424
AC009244.1	0.787625	0.721739	5.22881	2.72e-07	6.03111
SLC9A7	-0.653478	2.13737	-5.22823	2.73e-07	6.0283
GPX7	-0.878289	3.0847	-5.2257	2.77e-07	6.01593
LOX	-1.00489	2.91044	-5.22192	2.82e-07	5.99748
AP1S2	-0.671813	2.37291	-5.21989	2.85e-07	5.98758
TFEC	-0.682958	1.20454	-5.21858	2.87e-07	5.98121
NCKAP1L	-0.813216	2.40247	-5.21672	2.9e-07	5.97214
ABHD14B	0.646673	4.14366	5.21339	2.94e-07	5.95592
CYTIP	-0.893218	2.81991	-5.2132	2.95e-07	5.95497
ELOVL6	-0.914059	1.8053	-5.21279	2.95e-07	5.95297
NR4A1	1.22564	3.15382	5.21101	2.98e-07	5.94431
MFSD10	0.825179	4.90944	5.21084	2.98e-07	5.94348
MELTF	-1.04936	1.79497	-5.21075	2.98e-07	5.94304
SH2B3	-0.619559	2.76481	-5.20849	3.02e-07	5.93205
MED10	-0.615169	4.14721	-5.20805	3.02e-07	5.92992
APOD	1.76529	3.67991	5.20269	3.11e-07	5.90387
PRTFDC1	-0.758743	2.40853	-5.20234	3.11e-07	5.90215
NUP210	-0.827155	3.68236	-5.20068	3.14e-07	5.89407
IRF1	-0.773758	3.09611	-5.20029	3.15e-07	5.89221
RECQL4	-0.89416	2.50034	-5.19841	3.18e-07	5.88307
DSC2	-0.824549	2.47837	-5.19282	3.27e-07	5.8559
PCED1B	-0.823584	2.91067	-5.18741	3.36e-07	5.82966
DNA2	-0.620859	1.56301	-5.18733	3.36e-07	5.82928
PILRA	-0.80702	2.61441	-5.18676	3.37e-07	5.8265
MX1	-1.05255	3.57175	-5.18436	3.41e-07	5.8149
C1orf116	1.49617	4.6433	5.18109	3.47e-07	5.79906
SNX30	0.810018	2.55138	5.17734	3.53e-07	5.78088
LIMD2	-0.821941	2.837	-5.17618	3.55e-07	5.77525
KNDC1	0.766506	0.941976	5.17565	3.56e-07	5.77268
LTBP1	-0.891615	3.49691	-5.17464	3.58e-07	5.76781
EPAS1	0.714987	5.51655	5.17434	3.59e-07	5.76635
KIF22	-0.602979	3.23358	-5.1719	3.63e-07	5.75454
CD163L1	-0.645472	1.15878	-5.17109	3.64e-07	5.75064
FSCN1	-1.2941	4.70985	-5.17108	3.64e-07	5.75058
GEMIN2	-0.630141	2.27179	-5.17052	3.65e-07	5.74789
UACA	-0.630778	2.29557	-5.16763	3.71e-07	5.7339
COL15A1	-1.07689	3.22626	-5.16602	3.74e-07	5.72614
GZMA	-1.21733	3.44643	-5.16573	3.74e-07	5.7247
FCHO2	0.662339	3.45447	5.16498	3.76e-07	5.72112
DSTN	0.595486	6.94039	5.16282	3.8e-07	5.71066
TNFSF13	0.659116	2.57851	5.16024	3.85e-07	5.6982
GMPR	0.772375	2.11037	5.15289	3.99e-07	5.66275
CDCP1	-0.986166	3.65658	-5.14937	4.06e-07	5.64581
LGI3	0.635597	0.464197	5.14909	4.07e-07	5.64446
FAM83E	1.12238	3.54658	5.14471	4.16e-07	5.62338
MCM3	-0.649914	4.91178	-5.14436	4.17e-07	5.62168
AMN	0.987359	1.36446	5.14257	4.2e-07	5.61304
TRIM14	-0.620899	3.43433	-5.14232	4.21e-07	5.61186
PLEKHO2	-0.639897	3.73009	-5.14112	4.23e-07	5.60608
ATP2C2	0.872302	1.96118	5.13981	4.26e-07	5.59979
PIM3	0.814204	5.68272	5.13931	4.27e-07	5.59736
CCDC34	-0.667246	2.3865	-5.12904	4.5e-07	5.54803
DMTN	0.886021	2.90717	5.12811	4.52e-07	5.54358
COL1A1	-1.48939	7.92556	-5.12586	4.57e-07	5.53275
LMO3	1.38954	2.99895	5.12349	4.62e-07	5.5214
LPXN	-0.713066	3.39938	-5.12196	4.66e-07	5.51403
TEDC2	-0.656852	1.70228	-5.11994	4.71e-07	5.50438
SNAI1	-0.78341	2.06943	-5.11956	4.72e-07	5.50255
OXCT1	-0.939983	2.86029	-5.11589	4.8e-07	5.48497
WARS1	-0.984392	5.29131	-5.11556	4.81e-07	5.4834
TUBA1C	-0.704953	4.40842	-5.1121	4.89e-07	5.46683
ALPG	0.871367	0.573186	5.11116	4.92e-07	5.46229
COL5A1	-1.16146	4.6947	-5.10606	5.04e-07	5.43791
FSTL1	-0.893377	4.70274	-5.10474	5.08e-07	5.4316
BIN2	-0.715585	2.17393	-5.10443	5.09e-07	5.43011
OAS1	-0.996002	3.94432	-5.10158	5.16e-07	5.41649
PLA2G7	-0.89836	2.97095	-5.09763	5.26e-07	5.39761
ADAMDEC1	-1.27781	2.23944	-5.096	5.3e-07	5.38984
PRMT6	-0.638156	2.20629	-5.09326	5.38e-07	5.37677
AL391427.1	1.09934	0.899246	5.0911	5.43e-07	5.36644
AC104031.1	0.914417	0.976492	5.08929	5.48e-07	5.35781
TAGAP	-0.679808	1.86657	-5.08729	5.54e-07	5.34829
MARCHF1	-0.625194	1.50489	-5.08624	5.57e-07	5.34328
TLR1	-0.679511	1.8838	-5.08553	5.59e-07	5.33989
WNT3	0.621951	1.71787	5.08424	5.62e-07	5.33377
LINC02100	-0.631003	0.832546	-5.08133	5.7e-07	5.31988
PTPN7	-0.704319	1.92719	-5.07482	5.89e-07	5.2889
BCAR3	-0.718985	2.22825	-5.07479	5.89e-07	5.28876
CTSK	-0.971363	3.22758	-5.07454	5.9e-07	5.28757
AL133466.1	0.589678	0.433916	5.06921	6.06e-07	5.26224
SPOCK1	-1.11545	1.4811	-5.06831	6.08e-07	5.25799
HILPDA	-1.05021	3.3959	-5.06733	6.11e-07	5.25333
OSR2	-0.759644	1.40506	-5.06627	6.14e-07	5.24829
GSTP1	0.960737	8.41434	5.06464	6.19e-07	5.24052
TOB1	0.829519	4.77661	5.06201	6.27e-07	5.22807
AC007405.3	0.655494	1.36113	5.0557	6.47e-07	5.19813
SAMD4A	-0.708418	1.75689	-5.05547	6.48e-07	5.19703
SHE	0.94403	1.56263	5.0554	6.48e-07	5.19669
SH2D2A	-0.675018	1.97791	-5.05368	6.54e-07	5.18856
LAG3	-0.899993	1.77524	-5.0529	6.56e-07	5.18487
IL10RA	-0.774629	2.58148	-5.05241	6.58e-07	5.18254
BATF3	-0.697402	1.50722	-5.04929	6.68e-07	5.16775
IL18BP	-0.73447	2.65271	-5.04818	6.72e-07	5.16249
DOCK10	-0.717614	1.7527	-5.04742	6.74e-07	5.1589
AC078925.4	1.2132	1.78774	5.04628	6.78e-07	5.1535
GLT8D2	-0.754943	1.89929	-5.04436	6.84e-07	5.1444
RGS10	-0.797124	4.60259	-5.04433	6.85e-07	5.14426
HDGFL3	-0.596934	1.42018	-5.04107	6.96e-07	5.12886
TWIST1	-0.871832	1.16335	-5.03793	7.06e-07	5.11403
FHOD3	-0.725189	0.948544	-5.03685	7.1e-07	5.10892
VIPR1	0.668154	1.26373	5.03473	7.18e-07	5.09891
VSIG2	1.62309	2.9265	5.03359	7.22e-07	5.0935
PLEK	-1.00332	3.57711	-5.03138	7.3e-07	5.08306
MAFB	-0.851179	3.80927	-5.03121	7.3e-07	5.08228
APP	-0.632395	6.98963	-5.02763	7.43e-07	5.06537
TCTA	0.597039	3.79975	5.02508	7.53e-07	5.05338
AIFM2	0.638412	2.80019	5.01902	7.75e-07	5.0248
SHH	0.764194	0.975149	5.01859	7.77e-07	5.02279
GAS5	0.865826	5.08028	5.0166	7.84e-07	5.01342
TMEM200B	-0.61499	1.40293	-5.01553	7.89e-07	5.00838
COL8A2	-1.02456	2.6934	-5.01484	7.91e-07	5.00512
PTPRC	-1.01739	3.20356	-5.01474	7.92e-07	5.00466
DHCR24	0.761848	6.37888	5.01411	7.94e-07	5.0017
SIGLEC9	-0.613454	1.55261	-5.01029	8.09e-07	4.9837
LILRA5	-0.660232	1.41496	-5.00257	8.4e-07	4.94742
ALYREF	-0.686377	5.30358	-5.00177	8.44e-07	4.94369
EMP3	-0.871613	4.50402	-4.99934	8.54e-07	4.93227
SLC12A8	-0.615384	2.49787	-4.99877	8.56e-07	4.92957
MAF	-0.666168	2.82487	-4.9985	8.57e-07	4.9283
AOC1	1.73773	2.19482	4.9981	8.59e-07	4.92642
SLC2A6	-0.676603	1.91493	-4.99803	8.59e-07	4.92612
FCGR2B	-0.725211	1.71943	-4.99301	8.8e-07	4.90256
FKBP10	-1.12674	4.83594	-4.99287	8.81e-07	4.90192
CD7	-0.948137	2.37906	-4.9927	8.82e-07	4.90111
WFDC5	0.637637	0.156218	4.98968	8.95e-07	4.88694
MEX3D	-0.63873	3.44036	-4.98247	9.27e-07	4.85317
NCF2	-0.895059	3.82226	-4.97582	9.57e-07	4.82209
CACNB3	0.655132	2.54742	4.97574	9.58e-07	4.82172
FLRT3	1.10806	2.7486	4.97462	9.63e-07	4.81648
HCLS1	-0.835058	3.73352	-4.9739	9.66e-07	4.81311
CCL3L3	-0.635358	1.15563	-4.97318	9.7e-07	4.80977
SMCHD1	-0.632163	2.7268	-4.97315	9.7e-07	4.80959
MAD2L2	-0.655319	3.3502	-4.97157	9.77e-07	4.80224
GAS1	-0.907402	1.86635	-4.96895	9.9e-07	4.78998
CLEC7A	-0.913979	2.71094	-4.96695	1e-06	4.78064
CD200	-0.602534	2.06391	-4.96666	1e-06	4.77929
ABO	1.10167	2.28995	4.96655	1e-06	4.77878
SNAI2	-0.887044	2.04002	-4.96468	1.01e-06	4.77006
PSIP1	-0.61823	3.07293	-4.96366	1.02e-06	4.76531
C1QC	-1.21087	6.88349	-4.96128	1.03e-06	4.75422
LRRC15	-1.2299	2.18232	-4.95974	1.04e-06	4.74702
AL353572.4	0.626466	0.821183	4.95673	1.05e-06	4.73303
KLHDC9	0.738104	1.9966	4.95341	1.07e-06	4.71757
XAF1	-0.659005	1.43305	-4.95083	1.08e-06	4.70552
GNPNAT1	-0.643594	2.82567	-4.9478	1.1e-06	4.69143
CALD1	-0.806245	4.31535	-4.94455	1.11e-06	4.67634
SRD5A1	-0.668931	2.32508	-4.94432	1.12e-06	4.67527
E2F1	-0.90125	3.16516	-4.94324	1.12e-06	4.67024
MILR1	-0.78565	2.29298	-4.93797	1.15e-06	4.64577
NASP	-0.588586	3.83965	-4.93729	1.15e-06	4.6426
ARL4A	-0.625689	3.02917	-4.93579	1.16e-06	4.63562
ADSS1	0.776425	1.76755	4.93435	1.17e-06	4.62895
MME	-0.8303	1.21362	-4.93357	1.18e-06	4.62534
PKP2	-1.03993	1.73599	-4.93224	1.18e-06	4.61918
NID2	-0.697149	1.59451	-4.93158	1.19e-06	4.61612
TRIO	-0.715984	3.20733	-4.92466	1.23e-06	4.58405
CDKN2D	-0.586307	2.59218	-4.92273	1.24e-06	4.57511
ITGB2	-1.05026	4.66092	-4.92218	1.24e-06	4.57254
INPP5D	-0.719633	2.42975	-4.92112	1.25e-06	4.56767
ZNF486	-1.20897	2.14038	-4.92064	1.25e-06	4.56542
LSP1	-0.835526	3.0878	-4.91668	1.28e-06	4.54708
IFIT1	-1.07844	2.90088	-4.91531	1.28e-06	4.54078
TRPM2	-0.66122	1.74517	-4.91122	1.31e-06	4.52187
SLAMF7	-1.08196	3.2285	-4.91093	1.31e-06	4.52054
GPRIN1	-0.679206	1.73158	-4.90994	1.32e-06	4.51595
ENO3	0.985886	1.34257	4.90764	1.33e-06	4.50532
TNFRSF11B	-0.900898	1.74474	-4.90639	1.34e-06	4.49956
NAA38	0.733034	4.10678	4.90363	1.36e-06	4.48682
AC046185.3	-0.668858	1.29484	-4.89981	1.38e-06	4.46918
PPARG	-0.871919	2.13963	-4.89828	1.39e-06	4.46217
SERPINA1	1.59687	6.66049	4.89202	1.44e-06	4.43332
SLC44A4	1.38767	4.81792	4.8907	1.44e-06	4.42724
PHACTR3	1.05505	1.1683	4.8898	1.45e-06	4.42308
SOSTDC1	0.753284	0.604731	4.88957	1.45e-06	4.42203
AQP9	-0.905024	2.01931	-4.88751	1.47e-06	4.41255
CTLA4	-0.684228	1.53748	-4.88459	1.49e-06	4.39911
IL22RA1	-0.833929	1.10288	-4.87827	1.53e-06	4.37006
SCD5	-0.920972	2.16407	-4.87747	1.54e-06	4.3664
RASA3	-0.638549	2.53702	-4.87253	1.58e-06	4.34374
PCNA	-0.705904	6.04464	-4.87108	1.59e-06	4.33705
TNNT1	-1.65601	2.66579	-4.87079	1.59e-06	4.33574
SLC2A10	-0.992054	2.7507	-4.86833	1.61e-06	4.32445
TNFRSF10C	0.669263	1.3448	4.86567	1.63e-06	4.31228
RHPN2	-0.835643	3.08136	-4.86498	1.63e-06	4.30911
BARX1	1.68746	1.47965	4.86256	1.65e-06	4.29801
CRNDE	0.727694	1.52453	4.86	1.67e-06	4.28628
CXCL8	-1.39192	4.12109	-4.85704	1.7e-06	4.27276
LPIN2	0.77168	4.11397	4.85497	1.71e-06	4.26328
ALDH1L2	-0.678091	1.2742	-4.85456	1.72e-06	4.2614
SEPTIN3	-0.706507	0.983631	-4.85332	1.73e-06	4.25575
ZNF300	-0.692852	1.21476	-4.8533	1.73e-06	4.25565
LCK	-0.79823	2.38964	-4.85274	1.73e-06	4.2531
SMAGP	-0.668961	2.62795	-4.85236	1.74e-06	4.25134
GATA3	-0.666798	1.31403	-4.85178	1.74e-06	4.24872
PRSS16	0.597919	2.34287	4.8498	1.76e-06	4.23964
GEM	0.963871	3.83214	4.84968	1.76e-06	4.23909
TIGIT	-0.618228	1.33672	-4.84851	1.77e-06	4.23375
ADAMTS2	-0.804992	2.35426	-4.84738	1.78e-06	4.22858
SECTM1	-0.943062	3.67201	-4.8387	1.85e-06	4.18897
PPDPF	0.972033	7.54128	4.83702	1.87e-06	4.18132
LINC02257	1.02211	1.43396	4.83691	1.87e-06	4.18081
BNIP3P11	-0.787572	1.6341	-4.83543	1.88e-06	4.17408
FAM102A	-0.632673	3.96725	-4.83102	1.92e-06	4.154
CLDN7	0.773685	5.43455	4.83018	1.93e-06	4.15015
CD163	-1.12245	3.72911	-4.82903	1.94e-06	4.14495
CMAS	-0.600377	4.43973	-4.82836	1.95e-06	4.14188
ATRAID	0.590795	5.82725	4.82609	1.97e-06	4.13157
UBE2S	-0.85755	2.95349	-4.8259	1.97e-06	4.13071
NRIP3	-0.802964	1.48934	-4.82177	2.01e-06	4.11191
LAMA4	-0.725907	2.64887	-4.81202	2.1e-06	4.06762
CMPK2	-0.716471	2.34254	-4.81012	2.12e-06	4.059
FOXK1	-0.593815	2.58748	-4.80637	2.16e-06	4.04202
LDLRAD3	-0.62984	1.56763	-4.80393	2.18e-06	4.03095
VAV3	-0.759958	1.40142	-4.80276	2.2e-06	4.02567
C8orf34-AS1	0.689648	0.905247	4.80098	2.22e-06	4.01761
ITGAX	-0.778907	2.75266	-4.7976	2.25e-06	4.00231
CSF1	-0.846443	3.65111	-4.79646	2.26e-06	3.99715
CSF1R	-0.916406	3.91953	-4.79334	2.3e-06	3.98304
NBL1	-0.897519	5.43046	-4.78771	2.36e-06	3.95758
LINC02489	1.00935	1.23671	4.78754	2.36e-06	3.95681
APOL1	-1.02262	5.52604	-4.78707	2.37e-06	3.95467
AL359704.2	1.22798	0.665761	4.78478	2.39e-06	3.94434
AKR1C2	2.52381	2.70225	4.78055	2.44e-06	3.92528
TGFB3	-0.62572	2.32697	-4.77949	2.45e-06	3.92046
SLC27A3	0.61292	2.67671	4.77755	2.47e-06	3.91174
PLPP4	-0.596121	0.759862	-4.77696	2.48e-06	3.90909
CAD	-0.610081	3.27319	-4.77633	2.49e-06	3.90623
CCDC69	0.710031	3.1675	4.77365	2.52e-06	3.89416
HCP5	-0.75986	2.74506	-4.77356	2.52e-06	3.89373
CD84	-0.773812	1.96702	-4.76928	2.57e-06	3.87446
CMKLR1	-0.746166	2.1416	-4.7687	2.58e-06	3.87185
CCR1	-0.815807	2.98324	-4.76303	2.65e-06	3.84635
IQGAP2	-0.752869	1.89039	-4.7629	2.65e-06	3.84579
IFI16	-0.906177	4.555	-4.75924	2.7e-06	3.82932
AC027288.2	0.71362	0.738686	4.7579	2.71e-06	3.82331
PGF	-0.618209	1.51021	-4.75677	2.73e-06	3.81825
EVA1C	0.807029	2.48251	4.75621	2.74e-06	3.81571
CFAP251	-0.635852	1.27631	-4.75515	2.75e-06	3.81096
PMVK	0.659624	5.59505	4.75464	2.76e-06	3.80868
SMIM10L2A	0.761441	1.22308	4.75347	2.77e-06	3.80342
SEMA4A	0.687657	2.8688	4.74828	2.84e-06	3.78013
CSTA	-0.960234	2.54873	-4.74766	2.85e-06	3.77736
TALDO1	0.777274	6.2911	4.74507	2.88e-06	3.76576
PFKP	-0.892968	4.14309	-4.73567	3.01e-06	3.72365
ARSL	1.37727	2.55953	4.73312	3.05e-06	3.71225
C1QB	-1.19007	6.94383	-4.72544	3.16e-06	3.67794
CPVL	-0.921061	3.26175	-4.72348	3.19e-06	3.66922
PTGS1	-0.694134	2.23251	-4.7174	3.28e-06	3.64208
MMP2	-1.0316	5.9074	-4.7139	3.33e-06	3.6265
TM7SF2	0.8162	3.32789	4.71323	3.34e-06	3.62351
SKIL	-0.632771	3.75444	-4.70951	3.4e-06	3.60696
FBN1	-0.945618	3.03144	-4.70813	3.42e-06	3.60082
GYG2	0.742188	1.98886	4.70743	3.44e-06	3.59769
CHRD	0.706432	1.1999	4.70627	3.45e-06	3.59251
CTSD	0.867262	6.75421	4.70519	3.47e-06	3.58771
GADD45A	-0.850882	4.3021	-4.70275	3.51e-06	3.57687
ISG15	-1.28996	6.28531	-4.70256	3.51e-06	3.57603
SRGN	-0.968386	6.75891	-4.70146	3.53e-06	3.57114
TRIM8	0.624166	4.97652	4.6993	3.57e-06	3.56157
CCT5	-0.647991	5.26939	-4.69756	3.6e-06	3.55382
PKIB	-1.0518	2.19075	-4.69743	3.6e-06	3.55324
KBTBD12	-0.590414	0.723666	-4.69667	3.61e-06	3.54989
ALCAM	0.82033	4.98306	4.69505	3.64e-06	3.54266
HCK	-0.895602	3.41615	-4.69496	3.64e-06	3.54227
VAV1	-0.672052	2.69294	-4.69384	3.66e-06	3.5373
TGFB2	-0.824824	1.58083	-4.69331	3.67e-06	3.53495
SPON2	-0.888832	2.9074	-4.69326	3.67e-06	3.53474
CD8A	-0.957597	2.60734	-4.69242	3.68e-06	3.53102
IL6R	0.714276	3.13186	4.68959	3.73e-06	3.51847
PDP1	-0.676031	3.32241	-4.68861	3.75e-06	3.51409
RAB25	0.860164	6.12229	4.68344	3.84e-06	3.49119
PSME2	-0.618207	5.3627	-4.68232	3.86e-06	3.48623
ISLR	-1.08311	4.63364	-4.68132	3.88e-06	3.48182
PAQR4	-0.592362	1.99451	-4.67828	3.93e-06	3.46835
TSPAN2	-0.594719	1.42366	-4.67824	3.93e-06	3.46818
FAM3C2P	-0.790476	3.18794	-4.67776	3.94e-06	3.46605
CSRNP1	0.640044	3.77871	4.6766	3.96e-06	3.46093
RNASE2	-0.693079	1.50173	-4.67247	4.04e-06	3.44267
MCOLN2	-0.597129	1.41638	-4.6704	4.08e-06	3.43353
ZNF467	0.695112	2.21714	4.66944	4.1e-06	3.42931
ARHGAP30	-0.698588	3.03606	-4.66862	4.11e-06	3.42567
CYP4Z2P	0.65177	0.398313	4.66743	4.14e-06	3.42043
CALHM6	-0.722988	1.06959	-4.66549	4.17e-06	3.41184
PRRG2	0.598372	2.77618	4.66466	4.19e-06	3.40817
ZNF229	-0.645734	1.05179	-4.65563	4.37e-06	3.36836
MFSD2A	0.870736	3.02453	4.65479	4.38e-06	3.36466
MS4A6A	-0.861615	3.22876	-4.65263	4.43e-06	3.35515
FERMT3	-0.816615	3.56471	-4.65023	4.48e-06	3.34461
NPNT	1.04425	3.20401	4.64645	4.56e-06	3.32798
BMP6	1.02977	1.49742	4.64498	4.59e-06	3.3215
IGFBP2	1.52932	4.29413	4.6446	4.59e-06	3.31983
SMC4	-0.66352	2.89154	-4.6419	4.65e-06	3.30796
ATP1A1	0.73449	5.01579	4.63827	4.73e-06	3.29202
H2BC11	-0.99145	1.58727	-4.63653	4.77e-06	3.28441
MAP3K5	-0.594274	3.16671	-4.63598	4.78e-06	3.28199
LINC02195	-0.712739	1.02734	-4.63412	4.82e-06	3.27383
HTR1D	-0.772388	0.989512	-4.63286	4.85e-06	3.2683
SCAT8	0.815031	1.16523	4.62636	5e-06	3.23982
ARHGAP18	-0.618694	3.65972	-4.62327	5.07e-06	3.22628
SLFN13	-0.695952	2.6162	-4.62086	5.12e-06	3.21573
STK39	-0.691746	4.1929	-4.61855	5.18e-06	3.20562
CD40	-0.857024	3.77837	-4.61706	5.21e-06	3.19912
GPR68	-0.748731	2.23727	-4.61528	5.26e-06	3.19133
ABRACL	-0.594086	5.07458	-4.61393	5.29e-06	3.18545
ITPKC	0.598526	4.18686	4.61223	5.33e-06	3.17799
NOTCH2	-0.681934	3.33506	-4.61162	5.35e-06	3.17534
NRP2	-0.758402	2.77581	-4.60872	5.42e-06	3.16267
VEGFD	0.832199	1.0756	4.60817	5.43e-06	3.16027
MMP7	-1.71963	4.48905	-4.60672	5.47e-06	3.15396
ABCA3	1.25929	4.03724	4.60649	5.47e-06	3.15296
NOP53	0.61451	5.26184	4.6054	5.5e-06	3.14818
SLA	-0.700789	2.39901	-4.59571	5.75e-06	3.10594
STARD10	0.848	4.80065	4.59392	5.8e-06	3.09816
ABCC4	0.702097	2.34222	4.5905	5.89e-06	3.08329
ABCC3	1.04559	4.43875	4.58797	5.95e-06	3.07226
APOBEC3C	-0.730674	4.23356	-4.58768	5.96e-06	3.07103
FHL2	-0.924772	3.30642	-4.58673	5.99e-06	3.06687
SQLE	-0.71015	4.0031	-4.58447	6.05e-06	3.05707
MGST1	0.852818	5.16307	4.58189	6.12e-06	3.04588
IFNG	-0.646733	0.790589	-4.58123	6.14e-06	3.043
SLC15A3	-0.70107	2.83715	-4.57844	6.22e-06	3.03088
TRPV2	-0.628306	2.8004	-4.578	6.23e-06	3.02899
CATSPER1	-0.665521	0.994842	-4.57726	6.25e-06	3.02576
SUGCT	-0.653364	1.31632	-4.57689	6.26e-06	3.02418
CXCL16	0.711217	5.45167	4.56935	6.48e-06	2.9915
FAM20A	0.873657	3.13071	4.56856	6.5e-06	2.98805
NOSTRIN	0.608398	1.59642	4.56659	6.56e-06	2.97953
PGK1	-0.648144	6.91336	-4.56642	6.57e-06	2.97881
SDS	-0.797596	1.93252	-4.56565	6.59e-06	2.97548
ITGB1	-0.619596	4.89623	-4.56506	6.61e-06	2.9729
ZNF880	-0.632802	1.86432	-4.56285	6.67e-06	2.96337
EMILIN2	-0.600945	2.50722	-4.56205	6.7e-06	2.95989
C1orf53	0.724896	2.72688	4.56123	6.72e-06	2.95633
SSR4	0.762701	5.98195	4.56028	6.75e-06	2.95224
DCBLD2	-1.06608	3.43404	-4.55921	6.79e-06	2.94759
EPHA4	0.777748	1.96655	4.55821	6.82e-06	2.94329
DOK5	-0.696396	1.11787	-4.55766	6.83e-06	2.9409
EPHB2	-0.803746	1.9744	-4.5572	6.85e-06	2.93894
DPYSL3	-0.921193	4.71719	-4.55486	6.92e-06	2.9288
F5	-0.991294	1.32181	-4.55345	6.96e-06	2.92271
NUAK1	-0.661183	2.2698	-4.55336	6.97e-06	2.92235
EFNA1	0.838342	6.28244	4.55321	6.97e-06	2.92171
CRISPLD2	-0.698985	2.98215	-4.5522	7e-06	2.91731
KCTD12	-0.814188	4.27679	-4.55202	7.01e-06	2.91656
ABCC5	-0.615671	2.38915	-4.55184	7.02e-06	2.91575
AIF1	-0.862808	4.5182	-4.55077	7.05e-06	2.91116
PLXDC2	-0.782317	2.95148	-4.54907	7.1e-06	2.9038
SH2D4A	0.667467	3.4561	4.54744	7.16e-06	2.89681
PSAT1	-1.06192	3.51649	-4.54669	7.18e-06	2.89354
CD99L2	0.617787	3.87771	4.54667	7.18e-06	2.89348
ELAPOR1	1.3506	2.58424	4.54128	7.36e-06	2.87025
SP6	-0.697082	1.18451	-4.54053	7.38e-06	2.86703
JAK3	-0.602581	2.40502	-4.53669	7.51e-06	2.85047
HGSNAT	0.610349	4.0287	4.52636	7.87e-06	2.80606
ESYT3	0.650835	1.26143	4.51854	8.15e-06	2.77252
DOCK2	-0.651879	1.86861	-4.51582	8.25e-06	2.76084
TUBB2A	-0.842235	3.38345	-4.51567	8.26e-06	2.7602
C12orf75	-1.07989	2.57832	-4.51564	8.26e-06	2.76006
RGS1	-1.05145	4.36123	-4.51486	8.29e-06	2.75676
LINC01871	-0.878101	2.03806	-4.50851	8.53e-06	2.72956
MPEG1	-0.823386	3.33423	-4.50829	8.54e-06	2.72861
SYTL2	-0.756915	2.37454	-4.5077	8.56e-06	2.72608
ITGA11	-0.951385	2.16906	-4.50698	8.59e-06	2.72302
CYB5R3	0.598014	5.20383	4.50192	8.78e-06	2.70137
IL2RA	-0.724479	1.71879	-4.50108	8.82e-06	2.69777
ADGRF5	1.23599	4.50859	4.49562	9.04e-06	2.67448
P3H4	-0.70297	3.59945	-4.49489	9.07e-06	2.67134
CD96	-0.695174	1.63819	-4.49482	9.07e-06	2.67105
CAVIN2	0.920347	3.14887	4.48893	9.31e-06	2.64591
FAM126A	-0.724489	2.03067	-4.48839	9.33e-06	2.64362
PKDCC	-0.757171	1.91573	-4.48792	9.35e-06	2.64161
INSIG1	-0.60595	3.94058	-4.48774	9.36e-06	2.64086
C1QA	-1.09732	6.99197	-4.48694	9.39e-06	2.63744
CKS1B	-0.725587	3.76867	-4.48402	9.52e-06	2.62501
ATAD3C	0.692232	1.71092	4.47759	9.8e-06	2.59764
PDCD1	-0.68288	1.4553	-4.45906	1.06e-05	2.51901
ABCA1	-0.707955	2.61979	-4.45784	1.07e-05	2.51384
PPIB	0.587555	6.21936	4.45779	1.07e-05	2.51362
SPIRE2	0.599307	1.78593	4.45734	1.07e-05	2.5117
AC010503.4	0.689802	3.89121	4.45442	1.09e-05	2.49935
TLR8	-0.65764	1.39005	-4.45394	1.09e-05	2.49729
TSPAN4	0.689971	3.35229	4.45219	1.1e-05	2.48991
LPAR6	-0.604986	2.43552	-4.44731	1.12e-05	2.46928
FTLP14	0.707407	1.91791	4.44321	1.14e-05	2.45195
KCNK3	0.767018	1.13821	4.44246	1.15e-05	2.44877
SERPINB9	-0.686397	3.00306	-4.44211	1.15e-05	2.44731
FAM149A	0.609075	1.39861	4.44047	1.16e-05	2.44039
MIR4653	-0.773089	2.06835	-4.44012	1.16e-05	2.4389
DEPDC7	-0.660241	0.9726	-4.4386	1.16e-05	2.43249
FBXW5	0.652766	5.14661	4.43679	1.17e-05	2.42486
RNF213	-0.695967	3.86601	-4.43577	1.18e-05	2.42055
FKBP11	0.617514	3.02321	4.43474	1.19e-05	2.41622
IFI35	-0.74913	4.59343	-4.432	1.2e-05	2.40465
AC129507.4	1.03775	0.991333	4.42936	1.21e-05	2.39354
CXCR6	-0.664974	1.70888	-4.42909	1.22e-05	2.39242
C5AR1	-0.717615	3.121	-4.42604	1.23e-05	2.37956
AL109615.3	-0.700349	1.12166	-4.42576	1.23e-05	2.3784
AC022733.1	0.983966	0.948993	4.42436	1.24e-05	2.37252
GIMAP4	-0.716037	3.87888	-4.42375	1.24e-05	2.36994
FBXO2	0.976738	2.38939	4.42066	1.26e-05	2.35694
P2RY10	-0.625697	1.50378	-4.41542	1.29e-05	2.33493
NOXA1	0.856883	2.93787	4.41541	1.29e-05	2.3349
TKT	0.668046	5.79686	4.41505	1.29e-05	2.33336
MMP11	-1.49104	3.97024	-4.41053	1.32e-05	2.3144
VIM	-0.723794	6.23191	-4.40862	1.33e-05	2.30641
FLNC	-0.926514	1.58407	-4.40627	1.34e-05	2.29656
ADAMTS4	-0.67164	1.58814	-4.40487	1.35e-05	2.29068
NQO1	1.33857	5.78063	4.39854	1.39e-05	2.26419
SELENOW	0.668118	5.34371	4.39828	1.39e-05	2.2631
NR4A2	0.98533	2.69441	4.39809	1.39e-05	2.26228
CLEC3B	0.76329	1.80525	4.39683	1.4e-05	2.25701
CLEC4E	-0.66311	1.30823	-4.39658	1.4e-05	2.25599
LXN	-0.600808	3.74091	-4.39482	1.41e-05	2.2486
SLC16A5	0.772986	3.10618	4.3944	1.42e-05	2.24684
CST6	-1.47084	3.71271	-4.39192	1.43e-05	2.23649
HPDL	-0.678461	1.02649	-4.38968	1.45e-05	2.22711
SYT11	-0.605746	2.18822	-4.38055	1.5e-05	2.18902
FGL2	-0.91832	2.86452	-4.3755	1.54e-05	2.16798
PAM	0.64115	4.77746	4.37501	1.54e-05	2.16597
LOXL2	-0.90207	3.07477	-4.36898	1.58e-05	2.14088
BTK	-0.592019	1.93959	-4.36704	1.6e-05	2.13279
THEMIS2	-0.631793	3.4666	-4.36653	1.6e-05	2.13065
ZDHHC9	0.670256	5.1622	4.36611	1.6e-05	2.12894
EVI2A	-0.678328	1.86981	-4.36497	1.61e-05	2.12419
PTPN22	-0.683717	1.73192	-4.36299	1.62e-05	2.11597
RRAGD	-0.710609	2.61722	-4.35949	1.65e-05	2.10141
NKG7	-1.04279	3.37649	-4.35534	1.68e-05	2.08421
PLK2	-0.729301	3.42371	-4.35366	1.69e-05	2.07725
DIO2	-0.778656	1.42765	-4.34936	1.72e-05	2.05942
ICAM5	0.747718	1.44421	4.34592	1.75e-05	2.04517
HGD	1.405	2.2211	4.34358	1.77e-05	2.03551
CCL5	-1.08534	4.81294	-4.34259	1.78e-05	2.03141
IL32	-0.898952	4.5155	-4.34129	1.79e-05	2.02604
SH2D1A	-0.594929	1.26908	-4.33945	1.8e-05	2.01843
GGTLC1	1.39647	2.183	4.3375	1.82e-05	2.01035
IDO1	-1.19187	3.05108	-4.33486	1.84e-05	1.99948
CCN1	-0.903121	5.37277	-4.33474	1.84e-05	1.99897
EVI2B	-0.762078	3.41895	-4.33457	1.84e-05	1.99829
SLAMF6	-0.710124	2.0118	-4.3328	1.85e-05	1.99096
SASH3	-0.738856	3.08714	-4.33195	1.86e-05	1.98746
SH3BGRL2	0.853923	3.65773	4.33155	1.86e-05	1.9858
NCF1C	-0.58943	1.49149	-4.33141	1.86e-05	1.98522
CBR3	0.742298	1.61768	4.32757	1.9e-05	1.96938
C1QTNF1	-0.683427	2.45452	-4.32605	1.91e-05	1.96314
FER1L4	-0.784124	1.43011	-4.32369	1.93e-05	1.9534
GAS7	-0.605574	2.08967	-4.32295	1.93e-05	1.95033
PHLDA1	-0.800675	3.22955	-4.31724	1.98e-05	1.92684
ZNF750	0.96676	1.90177	4.31639	1.99e-05	1.92337
LGALS1	-0.941883	7.56887	-4.31028	2.04e-05	1.89824
EMILIN1	-0.880228	4.40234	-4.30989	2.05e-05	1.89662
HSD17B8	0.685529	3.75161	4.30948	2.05e-05	1.89493
HOXA3	-0.631632	1.06484	-4.30858	2.06e-05	1.89127
IRF8	-0.715369	2.56563	-4.30754	2.07e-05	1.88699
TDRD10	0.80773	1.15011	4.3069	2.07e-05	1.88436
GGH	-0.74016	1.76776	-4.30444	2.1e-05	1.87425
RAB6B	-0.671425	1.73625	-4.30289	2.11e-05	1.86789
SNHG29	0.705158	4.52883	4.30283	2.11e-05	1.86764
GOLT1A	0.976186	3.59319	4.30278	2.11e-05	1.86746
TRAF1	-0.60738	2.46563	-4.29844	2.15e-05	1.84965
TGM2	-0.821554	5.82733	-4.29776	2.16e-05	1.84687
MMP3	-0.764268	0.937911	-4.29697	2.16e-05	1.84364
DPP7	0.72147	5.18036	4.29549	2.18e-05	1.83756
NHS	-0.598116	1.31183	-4.29306	2.2e-05	1.82762
SYNPR-AS1	0.656389	1.1417	4.28811	2.25e-05	1.80739
PRKAG2-AS1	0.614207	1.38623	4.28774	2.25e-05	1.80586
MYLK	-0.663037	2.29511	-4.28649	2.26e-05	1.80076
CD2	-0.863774	3.58857	-4.28646	2.26e-05	1.80065
WAS	-0.673825	2.89951	-4.28636	2.27e-05	1.80021
SYNDIG1	-0.646711	1.16495	-4.28539	2.28e-05	1.79625
STAB1	-0.689538	2.78006	-4.28471	2.28e-05	1.79348
WNT2	-0.651471	1.56246	-4.28083	2.32e-05	1.77763
ELMO3	0.724162	4.06221	4.28023	2.33e-05	1.7752
ANO1	-0.846979	2.13148	-4.27524	2.38e-05	1.75485
PADI2	-0.751556	1.63229	-4.27422	2.39e-05	1.75067
SIRPG	-0.589703	1.39078	-4.27322	2.4e-05	1.74661
PDGFRA	-0.734579	2.35845	-4.26768	2.46e-05	1.72402
HES1	-0.691128	4.61099	-4.26665	2.47e-05	1.71985
ITGA6	-0.909301	3.49148	-4.26512	2.48e-05	1.71363
KLF6	-0.603538	4.8497	-4.25912	2.55e-05	1.6892
SLC39A4	0.802747	3.28661	4.2559	2.58e-05	1.67615
CLPSL2	0.629923	0.728923	4.25431	2.6e-05	1.66967
CYFIP2	0.58667	2.20011	4.25379	2.61e-05	1.66758
LINC02446	-0.69669	0.962634	-4.25331	2.61e-05	1.66564
C1orf162	-0.640877	2.9054	-4.25066	2.64e-05	1.65486
CD14	-0.908893	5.71478	-4.24879	2.66e-05	1.6473
SNHG9	0.721831	2.38581	4.24533	2.7e-05	1.63328
EYA2	-1.15926	1.82678	-4.24501	2.71e-05	1.63197
SPOCD1	-0.596598	1.06994	-4.24479	2.71e-05	1.63107
CTSE	1.90574	4.60223	4.24137	2.75e-05	1.61723
SNHG19	0.822789	3.89086	4.23819	2.79e-05	1.60435
SH3PXD2B	-0.600713	3.25332	-4.23452	2.83e-05	1.58951
GOLGA2P10	0.594442	1.68858	4.22759	2.91e-05	1.56153
MTMR11	-0.69837	2.72614	-4.22551	2.94e-05	1.55315
BTBD9	0.595538	2.66857	4.22373	2.96e-05	1.54597
KDELR3	-0.703986	4.76692	-4.22247	2.98e-05	1.54088
TFPI2	-1.87802	3.79313	-4.22186	2.99e-05	1.53843
APBB1IP	-0.635583	2.52989	-4.21678	3.05e-05	1.51796
HTRA3	-1.00023	4.12395	-4.21494	3.07e-05	1.51057
ANP32E	-0.687255	5.13329	-4.21192	3.11e-05	1.49839
HLA-B	-0.818985	9.25702	-4.20847	3.16e-05	1.48454
LINC00665	-0.689639	1.51147	-4.20685	3.18e-05	1.47801
BMP8A	-0.617958	1.52852	-4.20645	3.19e-05	1.47643
HNF4G	-0.679629	1.41625	-4.20481	3.21e-05	1.46982
MFAP2	-0.828697	2.8763	-4.20383	3.22e-05	1.46588
CORO1A	-0.750672	3.7796	-4.20339	3.23e-05	1.46412
CXCR4	-0.726831	5.21768	-4.20247	3.24e-05	1.46046
GLRX	-0.606092	2.87828	-4.19958	3.28e-05	1.44886
TCEA3	0.905505	3.89767	4.19826	3.3e-05	1.44355
COX4I2	0.668741	2.43445	4.19731	3.31e-05	1.43975
CACNA2D1	-0.600214	1.14575	-4.19578	3.33e-05	1.43362
AL135999.3	1.09937	1.69855	4.195	3.35e-05	1.43049
GGT7	0.630034	3.31694	4.19434	3.36e-05	1.42783
AL035661.1	0.859467	4.02613	4.19403	3.36e-05	1.4266
ROBO1	-0.612463	2.07399	-4.19363	3.37e-05	1.42499
C2CD4A	-1.03455	2.00318	-4.18917	3.43e-05	1.40712
LZTS3	0.712701	3.25707	4.18897	3.43e-05	1.40635
CRYM	1.13454	1.98645	4.1883	3.44e-05	1.40367
AC241585.1	-0.642826	2.5106	-4.18525	3.49e-05	1.39145
TMEM171	-0.67456	1.10239	-4.18262	3.53e-05	1.38094
GRAMD2A	0.757552	2.016	4.18082	3.55e-05	1.37376
ZFP36L2	-0.655233	4.65769	-4.18052	3.56e-05	1.37254
FSTL4	0.870827	1.15394	4.17944	3.57e-05	1.36823
ST8SIA4	-0.694172	2.49476	-4.17615	3.62e-05	1.35509
ARHGEF6	-0.5865	2.48047	-4.17608	3.62e-05	1.35481
CD6	-0.59756	1.76573	-4.17497	3.64e-05	1.3504
DPYSL2	0.671526	4.23486	4.17409	3.65e-05	1.34687
CCT8P1	0.744109	1.92522	4.17375	3.66e-05	1.34554
VTCN1	-1.13206	1.59363	-4.17193	3.69e-05	1.33827
SPSB2	0.665652	3.33669	4.17181	3.69e-05	1.33777
PTGIS	-0.818461	2.34452	-4.17084	3.71e-05	1.33392
TRDC	-0.691833	1.21853	-4.16926	3.73e-05	1.32764
ZBTB10	-0.621407	2.45042	-4.16593	3.78e-05	1.31435
AC108215.1	0.702193	0.65071	4.1641	3.81e-05	1.30707
NUDT14	0.629077	3.57913	4.16131	3.86e-05	1.29597
TCF7L1	0.744334	2.37668	4.16127	3.86e-05	1.29581
ITGA9	0.660327	2.03645	4.15796	3.91e-05	1.28264
MFAP5	-0.881561	1.2251	-4.15512	3.96e-05	1.27137
PRR15	-1.16896	2.12601	-4.15452	3.97e-05	1.26899
LINC01655	0.7328	0.970611	4.15222	4.01e-05	1.25984
ETV7	-0.65492	2.55507	-4.15215	4.01e-05	1.25957
SLC26A2	-0.704979	2.32555	-4.15156	4.02e-05	1.25724
ULBP2	-0.669791	1.40665	-4.15126	4.02e-05	1.25604
CASP1	-0.61619	2.9246	-4.14878	4.06e-05	1.24622
SELL	-0.849996	2.89359	-4.14627	4.11e-05	1.23627
GFUS	0.62124	4.91905	4.14595	4.11e-05	1.23499
CLEC5A	-0.715113	1.65834	-4.14489	4.13e-05	1.23078
ALOX5AP	-0.916929	4.33444	-4.14453	4.14e-05	1.22937
AC110285.2	0.640927	1.0912	4.14364	4.15e-05	1.22584
MTUS1	0.702649	3.58905	4.14325	4.16e-05	1.2243
INMT	0.922748	2.33936	4.14163	4.19e-05	1.21786
CAMK2N1	-0.979465	3.61494	-4.14048	4.21e-05	1.21331
SHISA4	0.616708	3.37559	4.13984	4.22e-05	1.21079
AP001542.3	0.628747	1.88431	4.1398	4.22e-05	1.21063
CDH24	-0.634064	2.19755	-4.13838	4.25e-05	1.20498
HOXB3	-0.730294	1.44411	-4.13801	4.25e-05	1.20352
THBS1	-0.968835	5.04241	-4.13423	4.32e-05	1.18857
ZYX	-0.611069	5.59675	-4.13207	4.36e-05	1.18004
CTSB	-0.60146	7.09634	-4.13207	4.36e-05	1.18003
TSC22D3	0.784882	5.28537	4.13056	4.39e-05	1.17407
MMP15	0.821746	4.32618	4.12562	4.48e-05	1.15456
CELF2	0.660901	2.78381	4.12385	4.51e-05	1.14758
KCNS3	0.77829	4.06123	4.1234	4.52e-05	1.1458
ARSD	0.666987	3.76267	4.12338	4.52e-05	1.14572
MIR200CHG	0.766023	2.79231	4.11911	4.6e-05	1.12891
KLHDC8B	0.590312	3.77724	4.11844	4.61e-05	1.12628
CFAP221	0.628188	1.11616	4.11679	4.65e-05	1.11975
MEDAG	-0.775741	2.0043	-4.11638	4.65e-05	1.11814
LINC02688	0.590851	0.463226	4.1158	4.67e-05	1.11588
B3GAT1-DT	0.602533	0.674182	4.11392	4.7e-05	1.10846
SPP2	0.671062	0.515108	4.11356	4.71e-05	1.10705
PKIG	-0.612237	3.86241	-4.11337	4.71e-05	1.1063
PIM2	-0.796803	4.61644	-4.11215	4.74e-05	1.1015
CYP1B1	-0.869383	3.50799	-4.10909	4.8e-05	1.08947
RPP25	-0.603741	3.09602	-4.10518	4.88e-05	1.07408
AXL	-0.693085	3.52475	-4.1027	4.93e-05	1.06434
SOX21	-0.865094	0.966663	-4.10101	4.96e-05	1.05773
ACSS1	0.694722	2.53533	4.0983	5.02e-05	1.0471
LTBP3	0.65554	4.03452	4.09474	5.09e-05	1.03312
DUSP2	-0.651528	2.45808	-4.09453	5.1e-05	1.03229
CD3D	-0.842591	3.58628	-4.08184	5.37e-05	0.982666
HNF1B	0.793005	2.30052	4.08023	5.41e-05	0.976353
DSP	-1.05775	4.99393	-4.07949	5.42e-05	0.973453
COCH	-0.684249	0.981453	-4.07918	5.43e-05	0.972241
GUCY1A1	-0.602056	2.05644	-4.07812	5.45e-05	0.968127
AKAP12	-0.965241	2.35489	-4.07442	5.54e-05	0.953695
LAMC2	-1.1839	5.08262	-4.06693	5.71e-05	0.924487
SUCNR1	-0.756846	1.31327	-4.05816	5.92e-05	0.890358
DAB2	-0.601026	3.17311	-4.05481	6e-05	0.877336
SIGLEC1	-0.682252	2.12137	-4.05238	6.06e-05	0.867895
FAM171A2	-0.6077	1.21984	-4.05021	6.12e-05	0.859498
DPY19L1	-0.67283	4.19033	-4.04894	6.15e-05	0.854548
TNFSF15	0.6919	1.77624	4.0473	6.19e-05	0.848224
SERPINE1	-1.05461	4.83118	-4.04596	6.23e-05	0.843007
AIM2	-1.06206	2.29419	-4.04211	6.33e-05	0.828088
AGR3	1.57693	4.61451	4.04181	6.33e-05	0.826951
TPBG	-0.604087	3.72901	-4.04041	6.37e-05	0.821524
PLEK2	-0.748874	3.63431	-4.03793	6.44e-05	0.811922
CRB3	0.617628	3.88242	4.03306	6.56e-05	0.793073
FEZF1-AS1	0.824715	1.16774	4.03292	6.57e-05	0.792529
ADGRD1-AS1	0.810752	1.3734	4.03194	6.6e-05	0.788745
PRKCA	-0.648993	2.15817	-4.03166	6.6e-05	0.787682
CSF2RB	-0.652822	2.51096	-4.03161	6.6e-05	0.787487
MS4A4A	-0.729155	2.93359	-4.02928	6.67e-05	0.778473
TRBD1	-1.09536	2.76485	-4.02487	6.79e-05	0.761447
SPTSSB	-0.861334	0.900133	-4.02112	6.89e-05	0.747009
HK3	-0.746633	2.24838	-4.01701	7.01e-05	0.731155
LPAR1	0.659858	2.74572	4.01684	7.01e-05	0.730529
A4GALT	-0.716046	2.72984	-4.01659	7.02e-05	0.729569
TNFAIP8L2	-0.618032	2.49351	-4.01566	7.05e-05	0.725983
MAP1B	-0.867821	2.27177	-4.01556	7.05e-05	0.72559
FPR1	-0.744387	2.49497	-4.01491	7.07e-05	0.723072
UGT8	-0.888179	1.88007	-4.01438	7.09e-05	0.721057
IL7R	-0.850499	3.13664	-4.01224	7.15e-05	0.712808
SIK1	0.618516	0.818565	4.01069	7.19e-05	0.706843
CACNA1H	0.612734	1.03972	4.0041	7.39e-05	0.681534
FAAH	0.61262	3.0932	4.00338	7.41e-05	0.678764
C11orf96	0.747249	2.97859	4.00324	7.41e-05	0.678235
CILP2	-0.798025	1.73619	-4.00226	7.44e-05	0.674479
SLC6A20	-0.741683	0.904134	-3.99655	7.62e-05	0.652569
FBLN1	-0.803531	4.28144	-3.99563	7.65e-05	0.649053
COL6A2	-0.908667	6.17688	-3.99448	7.68e-05	0.644659
HMGA2	-0.82379	0.79791	-3.99234	7.75e-05	0.636452
CABLES1	0.589665	2.15586	3.98683	7.93e-05	0.61537
MCF2L-AS1	0.619388	1.36428	3.98596	7.95e-05	0.612028
FIBIN	-0.694441	1.87993	-3.98592	7.95e-05	0.611895
HMGA1	-0.855001	6.71861	-3.98249	8.07e-05	0.598783
VEGFC	-0.708745	2.05411	-3.98214	8.08e-05	0.597465
NINJ2	0.68664	2.69723	3.98186	8.09e-05	0.596393
ZFP36	0.820709	6.47754	3.98089	8.12e-05	0.592667
TMPRSS2	1.00295	3.62126	3.97945	8.17e-05	0.587182
IL1R2	-0.688092	1.28954	-3.97762	8.23e-05	0.580208
PHYHD1	0.803822	2.01814	3.97583	8.29e-05	0.573373
FN3K	0.6043	2.82948	3.97385	8.35e-05	0.565799
IL1A	-0.659513	0.773079	-3.9727	8.39e-05	0.561434
HS3ST1	-0.688627	2.01236	-3.9701	8.48e-05	0.551525
CES1	1.41012	3.86215	3.96983	8.49e-05	0.550486
IGFL2	-0.650234	0.908041	-3.96441	8.68e-05	0.529852
TRAC	-0.843202	4.84323	-3.96229	8.75e-05	0.521803
FEZF1	0.628695	0.709292	3.96116	8.79e-05	0.517497
METRN	0.65888	2.54152	3.96001	8.83e-05	0.513154
NDRG1	-0.761228	5.50398	-3.95944	8.85e-05	0.510973
GBP3	-0.874235	3.4964	-3.95828	8.9e-05	0.50657
NPTX2	-0.852979	1.20436	-3.95728	8.93e-05	0.502763
TSPYL5	-0.896779	2.86477	-3.95725	8.93e-05	0.502651
HOXB5	-0.723218	1.56001	-3.95718	8.94e-05	0.50238
KRT80	-0.836288	3.80255	-3.95528	9e-05	0.495196
DPM3	0.826383	5.09534	3.95383	9.06e-05	0.489678
GLS	-0.903945	4.07771	-3.94331	9.45e-05	0.449824
NEURL1B	-0.744205	2.74964	-3.93771	9.66e-05	0.428636
HP	1.31085	2.01136	3.93647	9.71e-05	0.423938
FAS	-0.612036	2.3688	-3.93234	9.87e-05	0.408331
TTC9	-0.672112	3.09794	-3.92754	0.00010065	0.390223
SCEL	1.02652	3.18262	3.92175	0.000103008	0.368421
SOX9	-1.08437	2.81276	-3.92134	0.00010318	0.366852
KLHDC7B	-0.629334	1.15748	-3.92092	0.000103351	0.365292
LRRK2-DT	0.863662	1.28229	3.91911	0.000104102	0.358473
C6orf141	-0.668699	1.34052	-3.91484	0.000105892	0.342423
ARHGAP4	-0.6629	2.93605	-3.91081	0.000107611	0.327269
GSTA1	1.47492	2.54447	3.90235	0.000111303	0.295528
SLC7A5	-0.939816	4.45825	-3.90136	0.000111743	0.291816
NNMT	0.872059	5.597	3.90109	0.000111863	0.290806
CXCR3	-0.690622	2.01524	-3.89331	0.000115382	0.261667
COL7A1	-0.824869	1.51907	-3.8913	0.000116307	0.254158
TNS4	-1.24317	2.15416	-3.88551	0.000119011	0.232539
HAGLR	0.965263	2.63071	3.88392	0.000119766	0.226591
CRTAC1	0.961031	2.06216	3.87719	0.000123006	0.20149
NR1D1	-0.624446	2.78538	-3.87521	0.000123975	0.194112
H3C10	-0.834206	2.0163	-3.87447	0.000124338	0.191363
RNF208	0.670259	2.84112	3.87426	0.000124444	0.190561
CXCL12	-0.717279	2.69641	-3.87218	0.000125472	0.182829
LRRK2	1.00411	2.2114	3.87209	0.000125516	0.182499
GATM	-0.706828	1.63184	-3.87205	0.000125534	0.182366
ETS1	-0.602948	3.97502	-3.86993	0.000126595	0.174455
RBP1	-0.699278	2.11473	-3.86889	0.000127115	0.170596
SYT7	0.930493	2.84084	3.8688	0.000127161	0.17026
BIRC3	-0.897672	3.57327	-3.86776	0.000127686	0.166382
FCGR2A	-0.67338	3.51741	-3.86735	0.000127894	0.164856
DPT	-0.747195	2.09639	-3.86604	0.000128558	0.159985
VNN2	-0.615174	1.52204	-3.86536	0.000128902	0.157477
ITGAM	-0.710859	2.58486	-3.86247	0.000130383	0.146739
SLC9A3R2	0.709129	4.81385	3.86025	0.000131531	0.138498
NCF4	-0.613707	2.96695	-3.85777	0.000132822	0.129318
COL6A1	-0.832107	5.71968	-3.85572	0.000133905	0.121686
BTG2	0.744532	5.32065	3.85243	0.000135654	0.109492
MNDA	-0.746575	3.12532	-3.85179	0.000135991	0.107157
H2AX	-0.600398	4.83638	-3.85145	0.000136175	0.105889
INHA	1.17192	1.14328	3.8493	0.000137336	0.0979129
SDF2L1	0.645991	4.85801	3.8484	0.00013782	0.0946042
MAPK15	0.818014	1.85225	3.84831	0.000137874	0.0942406
RENBP	-0.703238	3.06674	-3.84825	0.000137902	0.0940474
HOXB4	-0.641291	1.46223	-3.84704	0.000138562	0.0895597
SYCP2	-0.662135	0.94198	-3.83629	0.000144546	0.0498457
PKIA	-0.664328	1.5374	-3.83615	0.000144627	0.0493176
COL16A1	-0.62719	2.62338	-3.83358	0.000146094	0.0398388
SLFN5	-0.591386	3.63424	-3.83287	0.000146498	0.0372456
TRIB3	-0.67247	3.59573	-3.83206	0.000146968	0.0342354
DUSP9	-0.654409	0.772303	-3.83131	0.000147399	0.0314902
MLF1	-0.608779	2.95768	-3.82798	0.000149339	0.0192054
ACTA2	-0.767113	4.69495	-3.82622	0.000150373	0.0127302
HSD17B6	0.861631	2.43429	3.82207	0.000152836	-0.00252872
GPCPD1	-0.654295	3.67617	-3.82011	0.000154011	-0.00971791
RNF39	0.692292	1.98996	3.81969	0.000154269	-0.0112903
DNTTIP1	-0.719288	5.03982	-3.81846	0.000155013	-0.0158074
APOL4	-0.591809	2.09242	-3.81755	0.000155563	-0.0191295
PTPRU	0.777873	3.44881	3.81574	0.000156667	-0.0257699
CBX6	-0.61224	3.10222	-3.81377	0.000157881	-0.0330158
PERP	-0.631511	6.03393	-3.81354	0.000158021	-0.0338444
IL36RN	-0.698249	0.738155	-3.81331	0.000158168	-0.0347173
FURIN	0.884054	5.78816	3.81321	0.000158226	-0.0350628
IL18	-0.63776	3.19509	-3.81147	0.000159307	-0.0414513
ALOX5	-0.708426	3.64593	-3.80906	0.000160812	-0.0502785
PSMB8	-0.599911	5.09807	-3.80695	0.000162146	-0.0580347
EFHD2	-0.611632	5.50282	-3.80604	0.00016272	-0.0613509
EPDR1	0.867439	4.0692	3.8011	0.000165889	-0.0794503
C3	1.07357	6.41177	3.80085	0.000166045	-0.0803317
SPI1	-0.745789	4.1261	-3.79975	0.000166763	-0.0843826
GIMAP2	-0.591721	2.69774	-3.79813	0.000167815	-0.0902815
PLAAT4	-0.98194	5.65491	-3.79278	0.000171348	-0.10983
FAM167A	0.698516	1.46251	3.7926	0.000171472	-0.110504
MMP1	-1.48265	4.09226	-3.7917	0.000172073	-0.113788
POLR2L	0.629137	6.1199	3.78717	0.000175129	-0.130305
SPARC	-0.709273	7.91713	-3.78701	0.00017524	-0.130895
KCNK1	0.810427	3.42118	3.78157	0.000178981	-0.150706
SMIM22	0.740287	2.76971	3.78062	0.000179643	-0.154172
SLCO2B1	-0.709883	3.02083	-3.78032	0.000179853	-0.155268
BPIFB2	1.15461	1.10164	3.77902	0.000180762	-0.159994
IL23A	-0.606752	1.61672	-3.77858	0.000181067	-0.161576
CTSL	-0.672105	4.75632	-3.77385	0.000184421	-0.178785
PAX9	-0.751771	1.44608	-3.77274	0.000185216	-0.182819
EPHX3	0.87293	2.96554	3.77131	0.000186246	-0.18802
MT1L	-0.883584	2.6404	-3.77086	0.000186567	-0.189632
STC2	-0.74046	1.85559	-3.77052	0.000186818	-0.190893
SMIM3	-0.599383	3.52515	-3.76943	0.000187607	-0.194846
VWA2	0.745208	2.64411	3.76196	0.000193105	-0.221923
RCN3	-0.880156	4.38938	-3.75887	0.000195421	-0.233099
GZMH	-0.795382	2.30463	-3.75641	0.000197293	-0.242032
HLA-DMB	-0.719585	3.79825	-3.75434	0.00019887	-0.249495
HIF3A	0.696524	1.09406	3.74842	0.000203466	-0.270901
TNFSF10	-0.778741	5.126	-3.74362	0.000207261	-0.288217
KIF12	0.853296	1.79317	3.74153	0.000208936	-0.295759
NMNAT2	-0.864543	1.40532	-3.73687	0.000212716	-0.312552
HOXB6	-0.613917	0.992396	-3.73575	0.000213627	-0.316556
MT1H	-0.632513	0.964602	-3.73533	0.000213973	-0.318071
AP002498.1	0.680551	0.993494	3.72988	0.000218503	-0.337691
FAM3B	1.02134	2.50775	3.72859	0.000219587	-0.342325
LYZ	-1.15329	6.97909	-3.72723	0.000220736	-0.347212
RCOR2	-0.624935	1.24617	-3.713	0.000233098	-0.398227
SELPLG	-0.639781	3.69923	-3.71278	0.000233288	-0.398992
SOD2	-0.609642	4.68741	-3.70933	0.000236391	-0.411357
PTPRZ1	-0.670404	0.75773	-3.70813	0.000237478	-0.415649
TAGLN	-0.723789	4.31703	-3.70722	0.000238299	-0.418882
LRP1	-0.617557	4.2151	-3.70447	0.000240815	-0.42871
SLC47A1	0.623114	1.3425	3.70056	0.000244438	-0.442683
GJA1	-0.863177	4.7648	-3.69947	0.000245457	-0.446575
GPRC5A	0.895574	5.83967	3.69713	0.000247655	-0.454916
AHR	-0.695883	4.28057	-3.69675	0.000248011	-0.456259
CAPN8	1.092	3.54679	3.69553	0.000249165	-0.460603
EPS8L2	0.587292	4.27257	3.69093	0.000253564	-0.476975
ANKRD1	-0.686633	0.988008	-3.6885	0.000255919	-0.48562
H2AC11	-0.621163	0.895158	-3.68697	0.000257412	-0.491061
ERBB3	0.629456	4.7499	3.68623	0.000258135	-0.493686
UPP1	-0.658754	3.89817	-3.68357	0.000260762	-0.503153
FXYD5	-0.702313	5.04325	-3.68333	0.000260995	-0.503988
IGSF6	-0.674191	2.841	-3.68314	0.000261192	-0.504694
ANKRD65	0.913717	3.14882	3.67852	0.000265811	-0.521089
ANTXR1	-0.7544	4.27734	-3.66501	0.000279772	-0.568942
AC011447.7	-0.607823	0.943649	-3.66193	0.000283044	-0.57981
SLC1A1	-0.72256	2.23721	-3.65812	0.000287147	-0.593258
SYTL1	0.625537	3.01703	3.65783	0.000287467	-0.594301
MT1G	-0.910062	2.29626	-3.65696	0.000288414	-0.597372
ASPH	-0.819357	4.25047	-3.65607	0.000289381	-0.6005
QPCT	-1.10933	3.43957	-3.65443	0.000291178	-0.606287
SLC5A3	-0.679144	2.59401	-3.65126	0.000294684	-0.617468
FOXE1	-0.64388	0.689727	-3.65061	0.000295407	-0.619756
P2RY6	-0.733324	2.52695	-3.65039	0.000295647	-0.620517
MS4A7	-0.633161	2.85014	-3.64921	0.000296965	-0.624672
SKAP1	-0.666651	2.25492	-3.6415	0.000305714	-0.651794
CACNG4	-1.00101	1.78472	-3.64141	0.000305815	-0.652103
DPYD	-0.673191	3.07137	-3.64092	0.000306379	-0.653823
GASK1B	-0.673257	2.7605	-3.63948	0.000308045	-0.65889
GPR183	-0.719434	3.54222	-3.63433	0.000314066	-0.676965
SLC5A1	-0.859945	1.09558	-3.63405	0.0003144	-0.677959
LGALS3BP	0.691951	8.23598	3.63285	0.00031582	-0.682167
SLC16A14	0.935204	2.17415	3.6326	0.000316116	-0.683042
CEACAM1	-0.70777	3.17024	-3.62966	0.000319627	-0.693352
DKK1	-1.20277	1.8029	-3.62866	0.000320831	-0.696862
TMEM98	0.695966	3.74808	3.62594	0.00032412	-0.706386
CXCL6	-0.874948	1.31725	-3.62579	0.000324294	-0.706887
CHRDL2	0.588582	0.919393	3.62471	0.000325608	-0.710663
NFKBIZ	-0.681618	3.21645	-3.62193	0.000329016	-0.720382
LAX1	-0.591074	1.47196	-3.61954	0.000331982	-0.728757
HOXB7	-0.908162	2.69154	-3.6184	0.0003334	-0.732735
AQP4	1.17127	2.71136	3.61685	0.000335343	-0.73816
HOXB2	-0.825416	1.96438	-3.61618	0.000336179	-0.740484
LARGE2	0.84101	3.2516	3.61367	0.000339357	-0.749265
HIF1A-AS3	-0.636417	0.880978	-3.60732	0.000347499	-0.771385
ZBTB18	0.608725	3.56656	3.60615	0.000349018	-0.775456
AC092535.5	-0.67614	1.77482	-3.60309	0.000353034	-0.78613
ERICH2	0.659807	2.07887	3.60173	0.000354819	-0.790835
IL2RG	-0.625403	2.34237	-3.59618	0.000362243	-0.810147
CYBRD1	0.697114	4.3935	3.5913	0.000368876	-0.82707
TYROBP	-0.790113	6.08888	-3.58419	0.000378755	-0.851714
BHLHA15	0.703249	1.93068	3.58346	0.000379784	-0.854244
ST6GALNAC1	1.08886	3.75013	3.57685	0.000389214	-0.877107
HSPA6	-0.785294	2.51258	-3.5765	0.000389715	-0.878305
BAMBI	-1.00773	2.88574	-3.57585	0.000390654	-0.880548
MAGEA3	-1.29666	1.20754	-3.57555	0.0003911	-0.881611
HMGB3	0.907368	5.74282	3.57546	0.000391216	-0.88189
THY1	-0.64109	3.25963	-3.57288	0.000394977	-0.890805
BCAS1	0.904061	1.56754	3.56967	0.000399699	-0.90188
ADORA1	-0.700433	1.37036	-3.56083	0.000412982	-0.932342
LY96	-0.603916	4.51428	-3.55967	0.000414757	-0.936337
HMGCS2	0.722514	0.50696	3.55752	0.00041807	-0.943749
SPAG4	-0.600073	2.92652	-3.55713	0.000418662	-0.945067
GPR37	-0.611192	1.12608	-3.55601	0.000420394	-0.948912
OPLAH	0.591708	2.68037	3.55594	0.000420503	-0.949154
CD3E	-0.701651	3.12412	-3.55534	0.000421434	-0.951212
PLA2G2D	-0.87976	1.8251	-3.54964	0.000430384	-0.970784
UNC13D	-0.701912	3.13067	-3.54702	0.000434561	-0.97978
SLC6A8	-0.721446	2.90535	-3.54683	0.00043486	-0.980419
PLAC8	-0.840105	2.09049	-3.54085	0.000444542	-1.00092
LGSN	0.853415	1.68969	3.53877	0.000447955	-1.00804
KLF2	0.609944	2.96485	3.53679	0.000451226	-1.01482
MDFI	-0.74892	3.19754	-3.53572	0.000453008	-1.01849
DHRS9	-0.789777	1.64465	-3.5348	0.00045453	-1.02161
OSGIN1	0.779067	2.00841	3.53471	0.000454686	-1.02193
STXBP1	0.591452	2.87401	3.53369	0.000456396	-1.02542
DACT2	0.736222	1.01731	3.53018	0.000462306	-1.03739
CST7	-0.74082	3.47992	-3.52782	0.000466324	-1.04545
CYTH3	-0.591317	3.37161	-3.52638	0.000468782	-1.05034
PLN	-0.654602	1.86286	-3.52357	0.00047364	-1.05993
GRIN2D	-0.630567	1.139	-3.52189	0.00047656	-1.06565
CD4	-0.638412	4.50697	-3.52029	0.000479357	-1.0711
DOK2	-0.618504	2.93519	-3.51776	0.000483818	-1.07971
TMPRSS6	0.818045	1.27311	3.51657	0.000485924	-1.08376
VSIG4	-0.849335	4.04853	-3.51647	0.000486114	-1.08412
SOX2	-1.14417	2.44571	-3.50585	0.000505328	-1.12017
PANX2	0.783633	2.32474	3.50403	0.000508699	-1.12635
NYNRIN	-0.604382	2.74581	-3.50377	0.00050917	-1.12722
SV2A	-0.618672	1.34492	-3.50131	0.000513749	-1.13554
AEBP1	-0.785521	6.03116	-3.50092	0.000514493	-1.13689
IGHG1	-1.42502	10.1073	-3.49795	0.000520086	-1.14694
ID1	0.888359	4.9551	3.49445	0.000526752	-1.15878
TMEM238	0.648945	2.71344	3.48942	0.000536461	-1.17575
SMOX	-0.594994	2.46291	-3.48883	0.000537624	-1.17776
NPW	0.958133	1.22234	3.48033	0.000554451	-1.2064
ERN2	1.04758	1.44679	3.47922	0.000556696	-1.21016
STC1	-0.791474	2.78508	-3.47379	0.000567752	-1.22842
GSTA4	0.613007	3.4634	3.46982	0.00057597	-1.24177
GPR34	-0.659839	2.29347	-3.46911	0.000577448	-1.24415
H2AC13	-0.788194	1.28374	-3.46713	0.000581587	-1.25079
CHI3L2	0.773869	2.073	3.46301	0.000590303	-1.2646
CLIC6	1.18411	4.29262	3.46301	0.000590309	-1.26461
APOC1	-0.812364	4.55627	-3.45273	0.000612598	-1.29902
PHGDH	-0.73771	1.85972	-3.45028	0.000618021	-1.3072
GJB1	0.936255	1.56924	3.44923	0.000620364	-1.31071
AGPAT2	0.67818	5.81219	3.44877	0.000621393	-1.31225
CXCL17	1.28552	6.86753	3.44798	0.000623168	-1.31489
RASSF6	-0.591332	1.59888	-3.44765	0.000623897	-1.31598
DUSP5	-0.667524	4.13073	-3.44286	0.000634732	-1.33195
GPR35	-0.591387	1.17792	-3.43955	0.000642327	-1.34299
PRSS23	-0.613262	3.76396	-3.43818	0.000645505	-1.34757
ZSCAN31	0.598476	2.25951	3.43418	0.000654835	-1.36088
PEG10	-1.25772	3.0951	-3.43331	0.000656871	-1.36376
SERPINF1	-0.704655	5.24252	-3.43008	0.000664514	-1.37449
LAMP3	0.849716	4.06485	3.42823	0.000668926	-1.38063
ADGRF1	-1.04737	2.35423	-3.42018	0.000688478	-1.40734
HSPA7	-0.688087	2.22874	-3.41363	0.000704781	-1.42904
CLGN	-0.708135	1.28351	-3.41272	0.000707055	-1.43202
IER3	-0.736699	4.45268	-3.40925	0.000715875	-1.44351
S100P	1.94367	6.63278	3.40855	0.000717662	-1.44582
OLR1	-0.780206	3.19062	-3.40341	0.000730899	-1.46276
TPPP	0.63089	1.66028	3.40317	0.000731535	-1.46356
AFAP1L2	-0.612584	2.11282	-3.40153	0.000735812	-1.46896
[truncated: 316 more rows]
