# Supplementary material for: Identification of a novel nucleotide metabolism-related signature for predicting lung adenocarcinoma prognosis
Source: Research Square preprint supplement (doi:10.21203/rs.3.rs-7509527/v1), 2025-10-06
Supplement: Supplementary file 2 [file b82d39771b160de3c4d16b69.xlsx]

## Sheet: univariate Cox
id	HR	HR.95L	HR.95H	pvalue
age	0.996934	0.978778	1.01543	0.743287
gender	1.02687	0.718151	1.46831	0.884442
stage	1.64068	1.39316	1.93216	2.95664e-09
T	1.59881	1.28577	1.98805	2.43352e-05
M	1.74368	0.95826	3.17286	0.0687026
N	1.7739	1.44784	2.17339	3.18165e-08
riskscore	5.38029	3.0176	9.59288	1.17494e-08

## Sheet: multivariate Cox
id	HR	HR.95L	HR.95H	pvalue
age	1.00917	0.989892	1.02883	0.35352
gender	1.03	0.714163	1.48552	0.874293
stage	1.83779	1.12531	3.00137	0.0150283
T	1.1564	0.908899	1.4713	0.236972
M	0.427296	0.116763	1.56369	0.198941
N	0.932598	0.605557	1.43626	0.751453
riskscore	4.22234	2.28586	7.79933	4.21394e-06
