# Supplementary material for: Identification of a novel nucleotide metabolism-related signature for predicting lung adenocarcinoma prognosis
Source: Research Square preprint supplement (doi:10.21203/rs.3.rs-7509527/v1), 2025-10-06
Supplement: Supplementary file 3 [file c60e14ed1267a50c27b4c0db.xlsx]

## Sheet: lasso coefficient
gene	coef	hr	low.ci	upp.ci
IRX5	-0.128648	0.762257	0.623779	0.931478
GADD45G	-0.0778267	0.803146	0.655916	0.983425
TSPAN7	-0.0733072	0.785311	0.643869	0.957826
MKI67	0.000163894	1.24374	1.09302	1.41523
TGFBI	0.0237285	1.17368	1.04567	1.31736
CDCA5	0.0357987	1.23828	1.08672	1.41098
BARX1	0.0894056	1.14687	1.00201	1.31267
PTTG1	0.122971	1.25181	1.09784	1.42738
SEMA3C	0.135467	1.29216	1.12915	1.47872
