# Supplementary material for: Identification of a novel nucleotide metabolism-related signature for predicting lung adenocarcinoma prognosis
Source: Research Square preprint supplement (doi:10.21203/rs.3.rs-7509527/v1), 2025-10-06
Supplement: Supplementary file 4 [file d88ead0029bf52158f916086.xlsx]

## Sheet: Coxoutput.tcga
gene	HR	z	pvalue	lower	upper
SEMA3C	1.29216	3.72525	0.000195121	1.12915	1.47872
PTTG1	1.25181	3.35395	0.000796659	1.09784	1.42738
MKI67	1.24374	3.30954	0.000934505	1.09302	1.41523
CDCA5	1.23828	3.20845	0.00133452	1.08672	1.41098
TPX2	1.18309	2.86212	0.00420816	1.05442	1.32745
MMP14	1.22118	2.85691	0.00427782	1.06474	1.4006
TGFBI	1.17368	2.71791	0.00656951	1.04567	1.31736
IRX5	0.762257	-2.65389	0.00795702	0.623779	0.931478
BIRC5	1.20766	2.63306	0.00846182	1.04942	1.38977
AURKA	1.19023	2.57916	0.00990403	1.04269	1.35863
TSPAN7	0.785311	-2.38524	0.017068	0.643869	0.957826
MELK	1.16703	2.37693	0.0174576	1.02747	1.32555
FAM83D	1.16774	2.36031	0.0182595	1.02665	1.32821
GGT6	0.800212	-2.35914	0.0183175	0.664949	0.962991
POSTN	1.17884	2.31721	0.0204923	1.02569	1.35486
CDK1	1.14885	2.25517	0.0241226	1.01833	1.29609
CLMP	1.14012	2.22887	0.0258228	1.01595	1.27948
SELENBP1	0.813055	-2.22056	0.0263807	0.677311	0.976005
RAP1GAP	0.824959	-2.21043	0.027075	0.695559	0.978432
SFTPB	0.820064	-2.19654	0.0280531	0.687029	0.978861
IRX2	0.795869	-2.14081	0.0322892	0.645743	0.980897
GADD45G	0.803146	-2.12174	0.03386	0.655916	0.983425
ASF1B	1.13582	2.05668	0.039717	1.00601	1.28238
BARX1	1.14687	1.98907	0.0466934	1.00201	1.31267
SCNN1B	0.728428	-1.98779	0.046835	0.532966	0.995574
CACNA2D2	0.827468	-1.97796	0.0479337	0.685884	0.998279
